# Supplementary material
Source: PubMed Central journal article supplement (PMC6254018)
Supplement: molecules-14-00352-s002.pdf [file molecules-14-00352-s002.pdf]

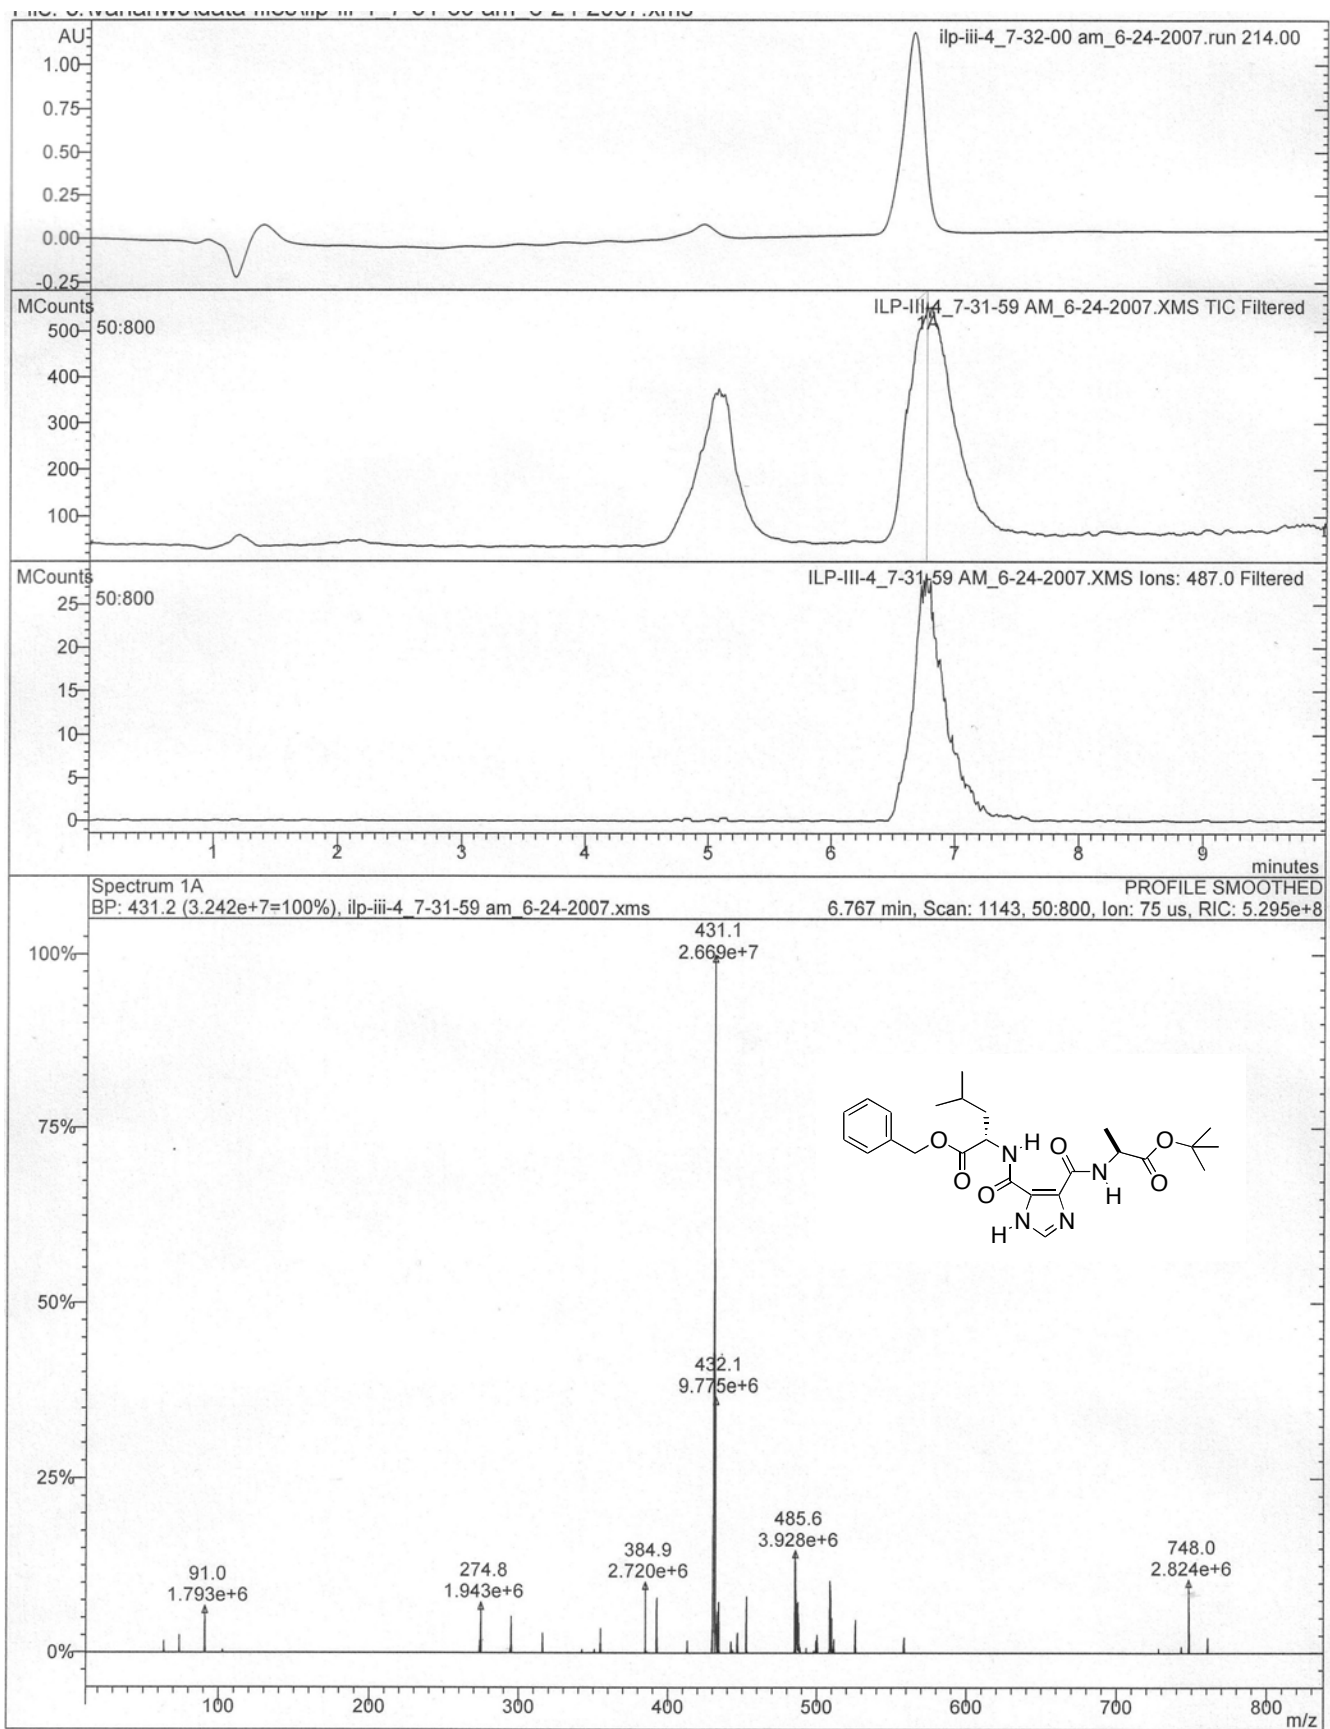

Figure S27. LC/MS data for 4{27}.

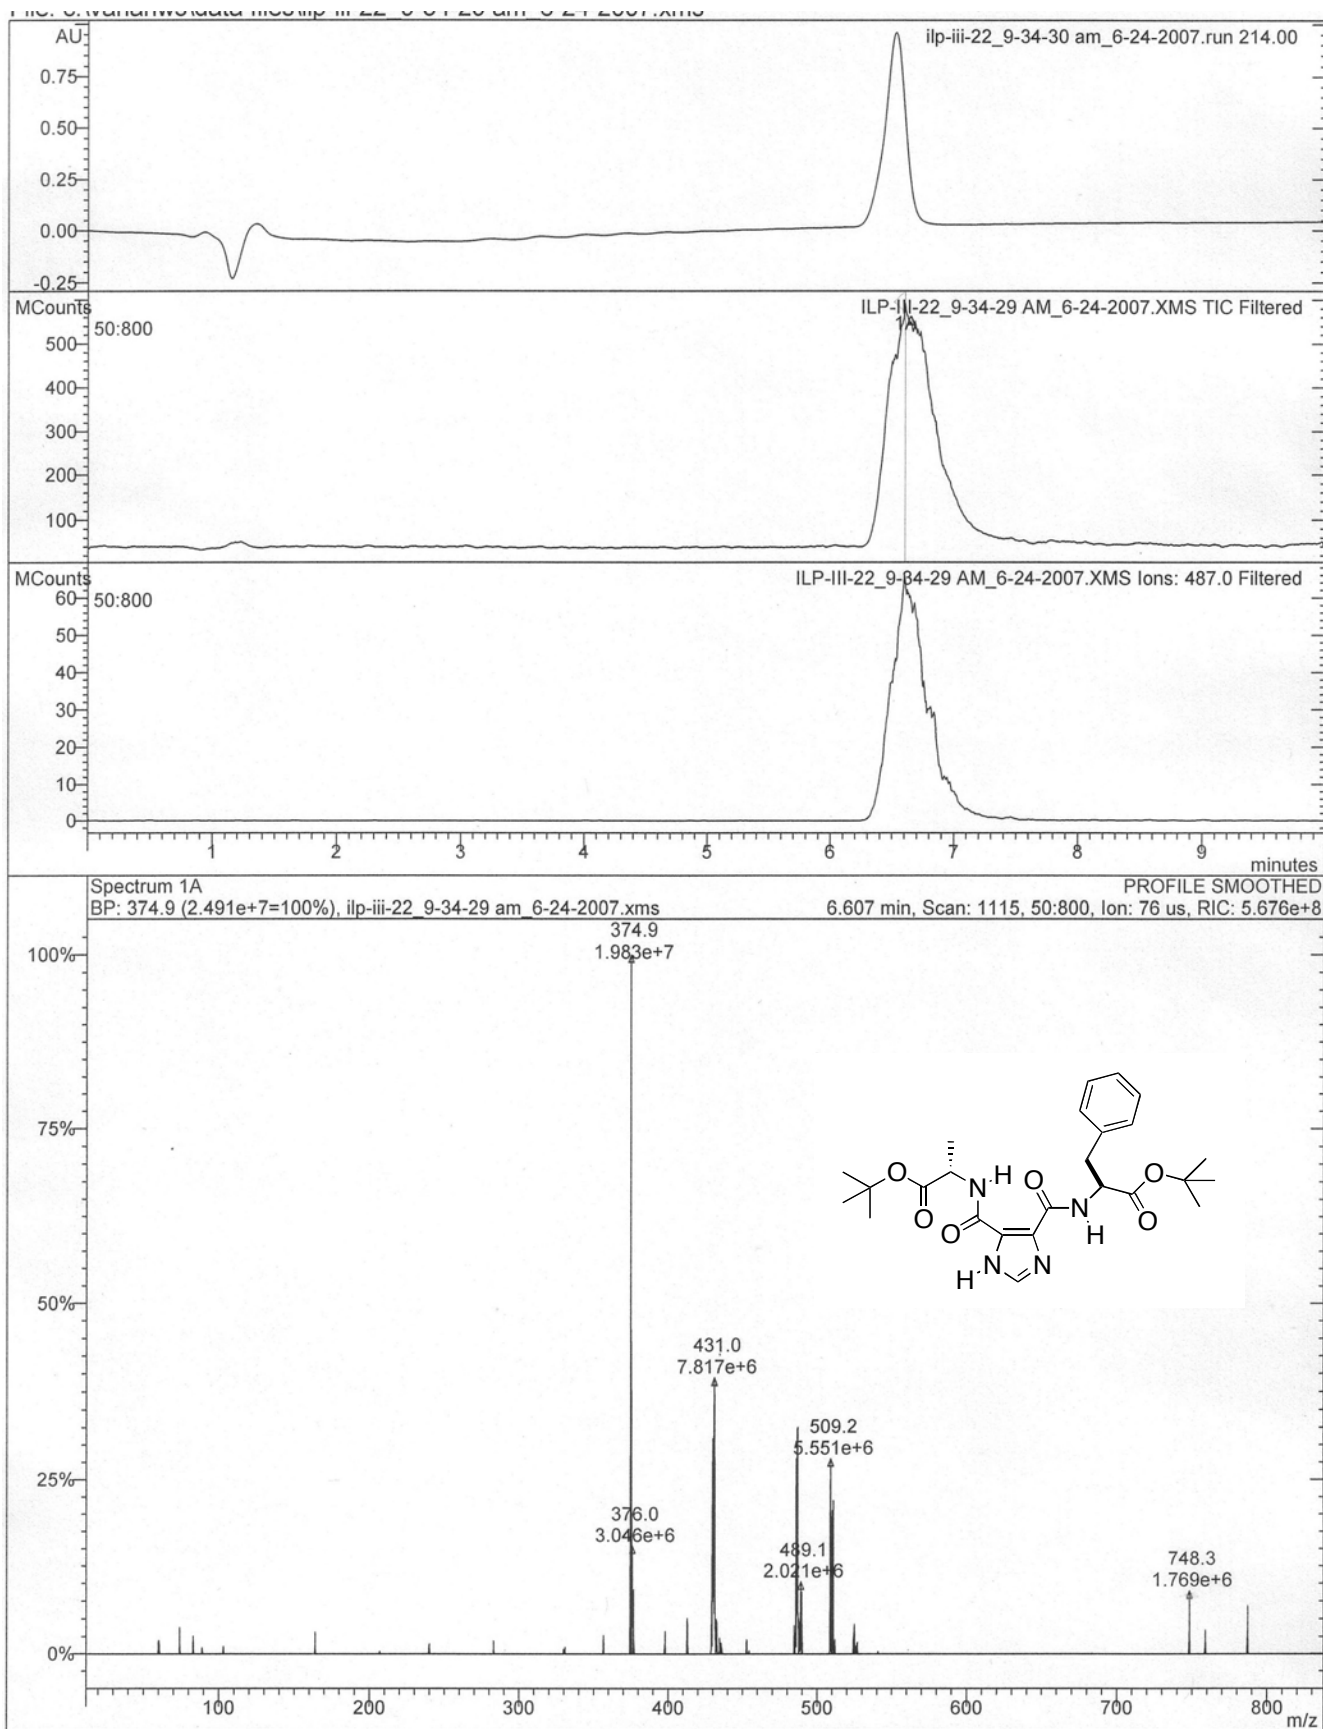

Figure S28. LC/MS data for 4{28}.

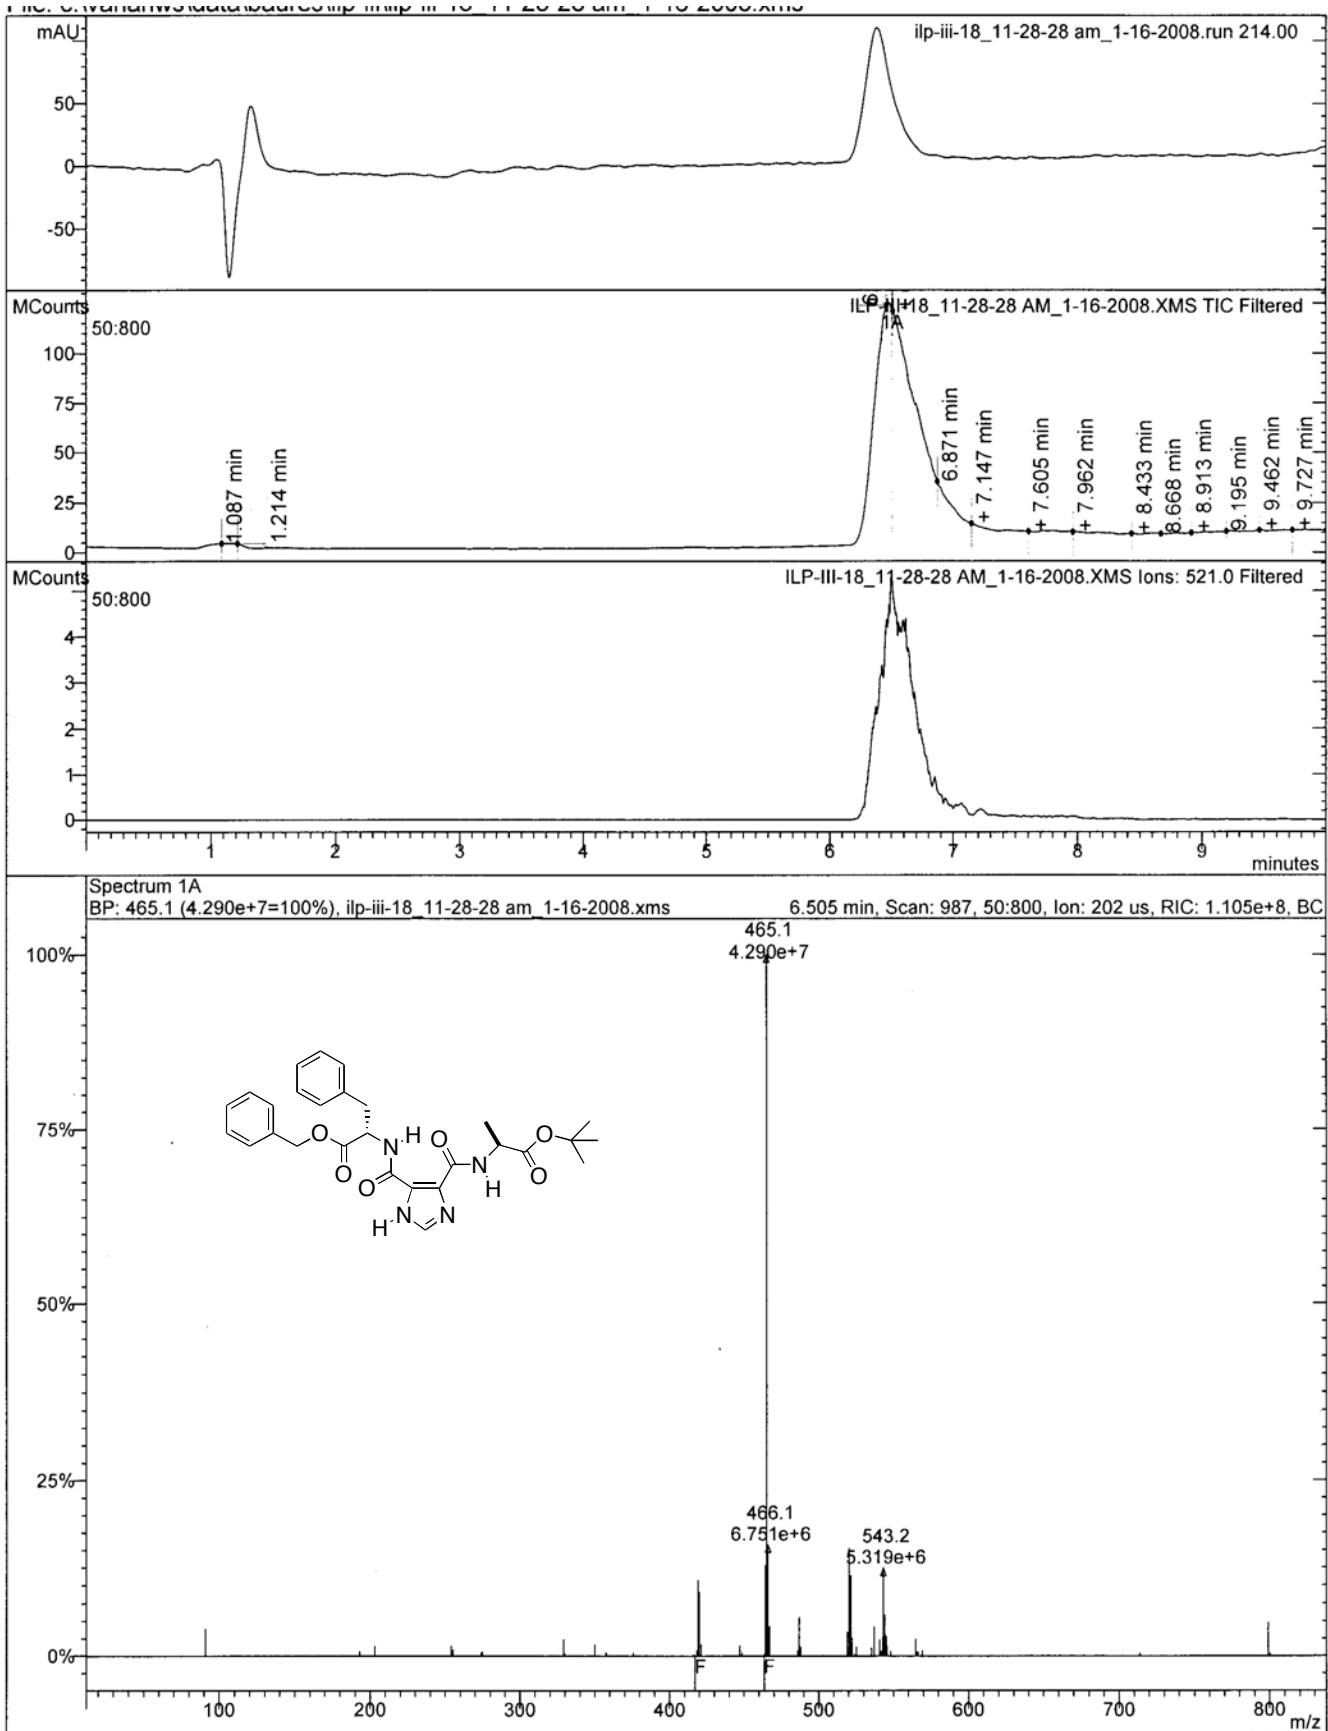

Figure S29. LC/MS data for 4{29}.

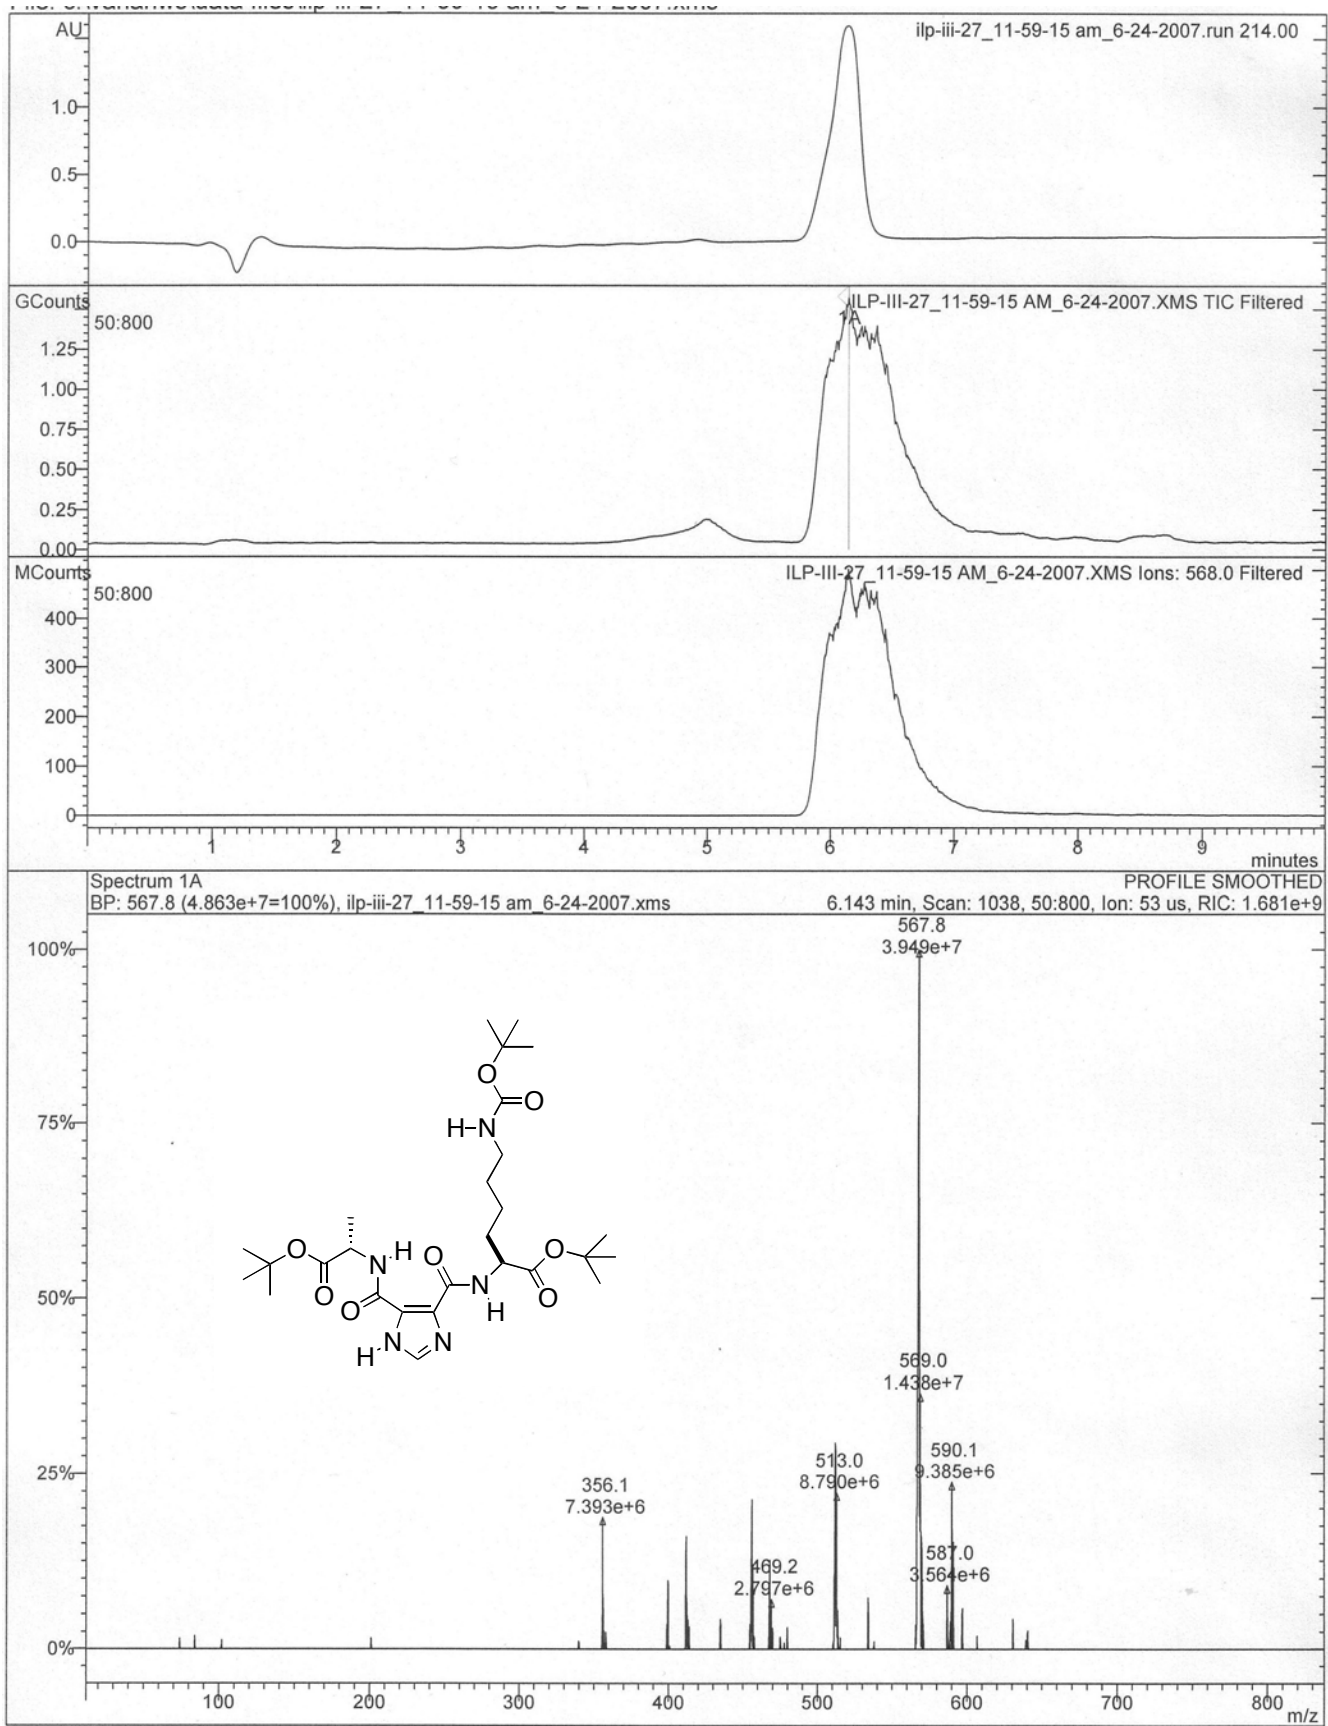

Figure S30. LC/MS data for 4{30}.

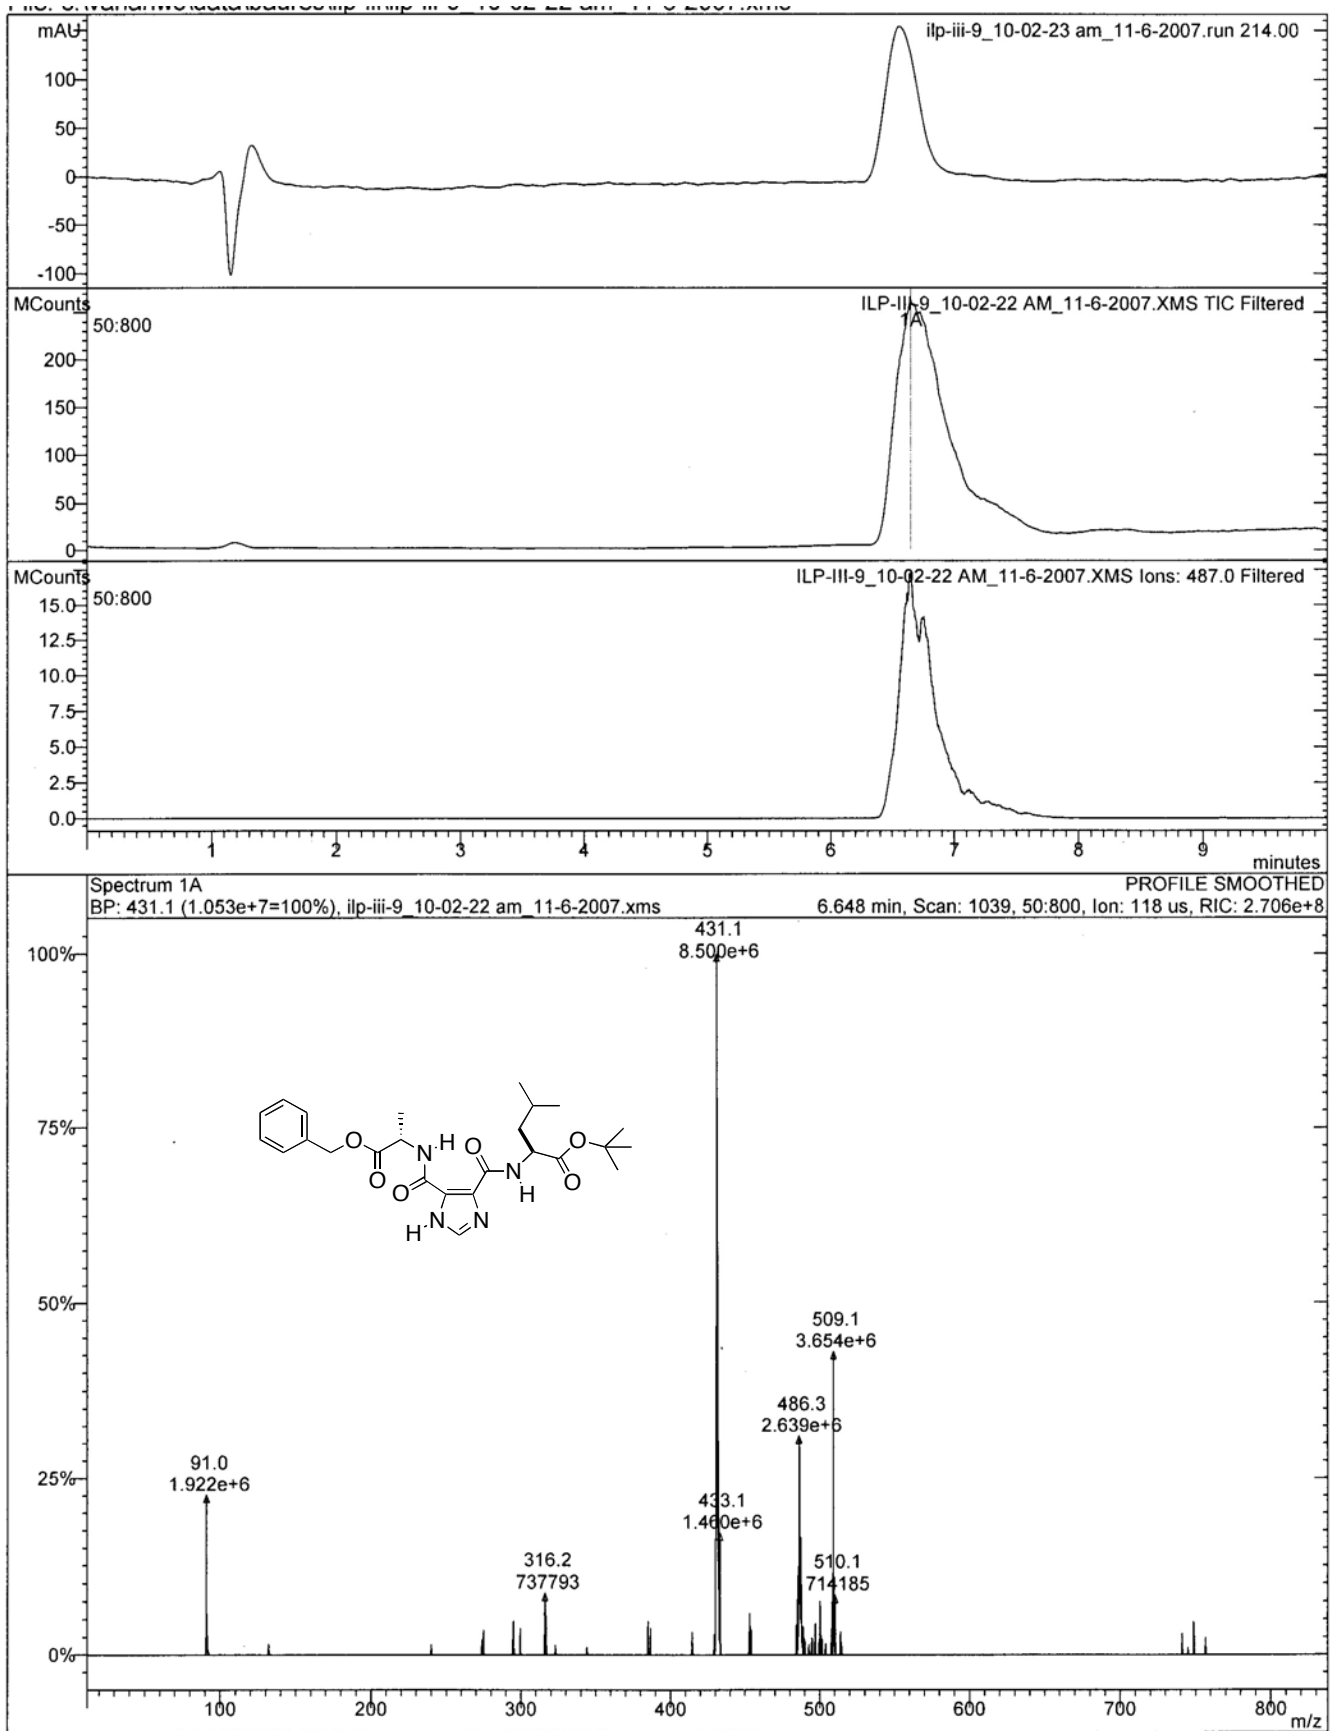

Figure S31. LC/MS data for 4{31}.

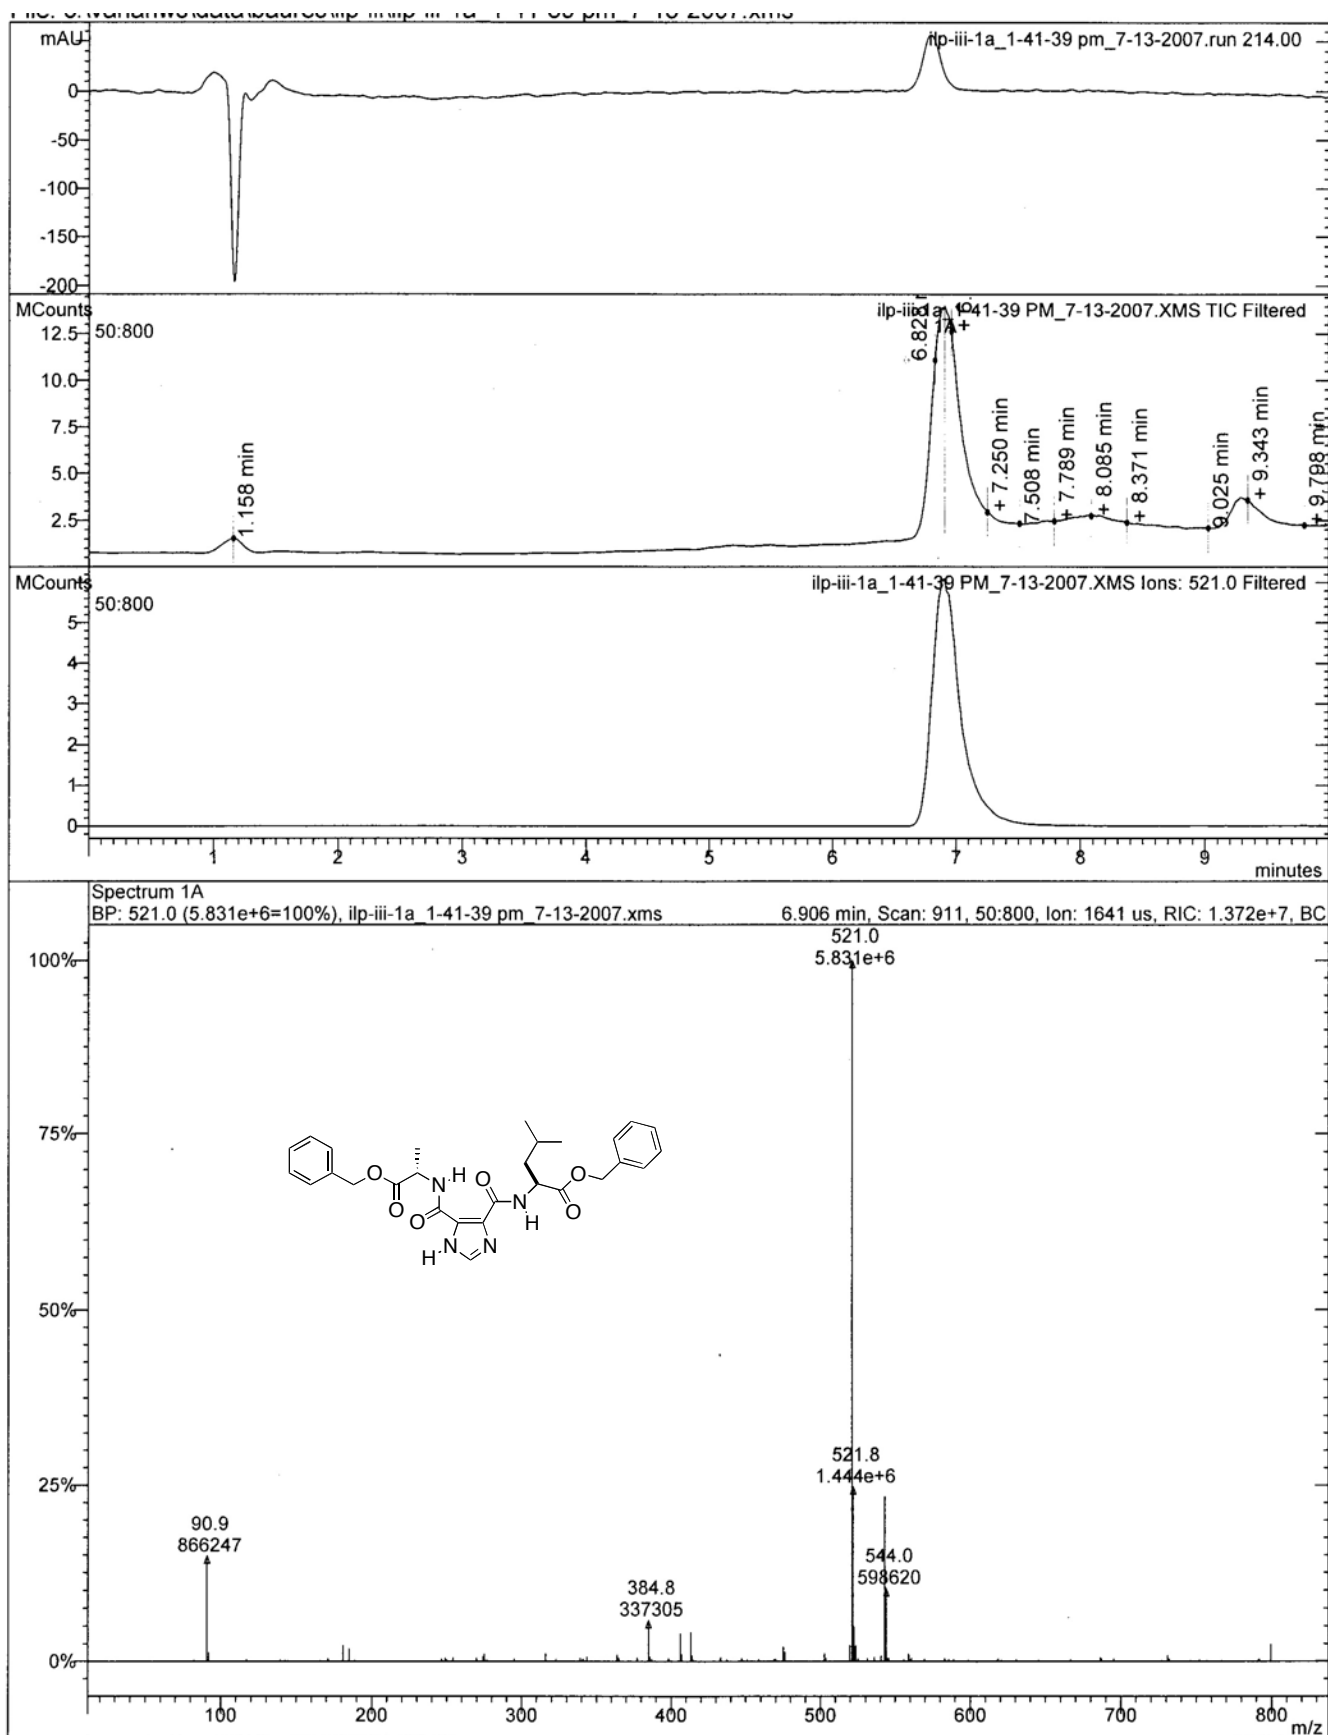

Figure S32. LC/MS data for 4{32}.

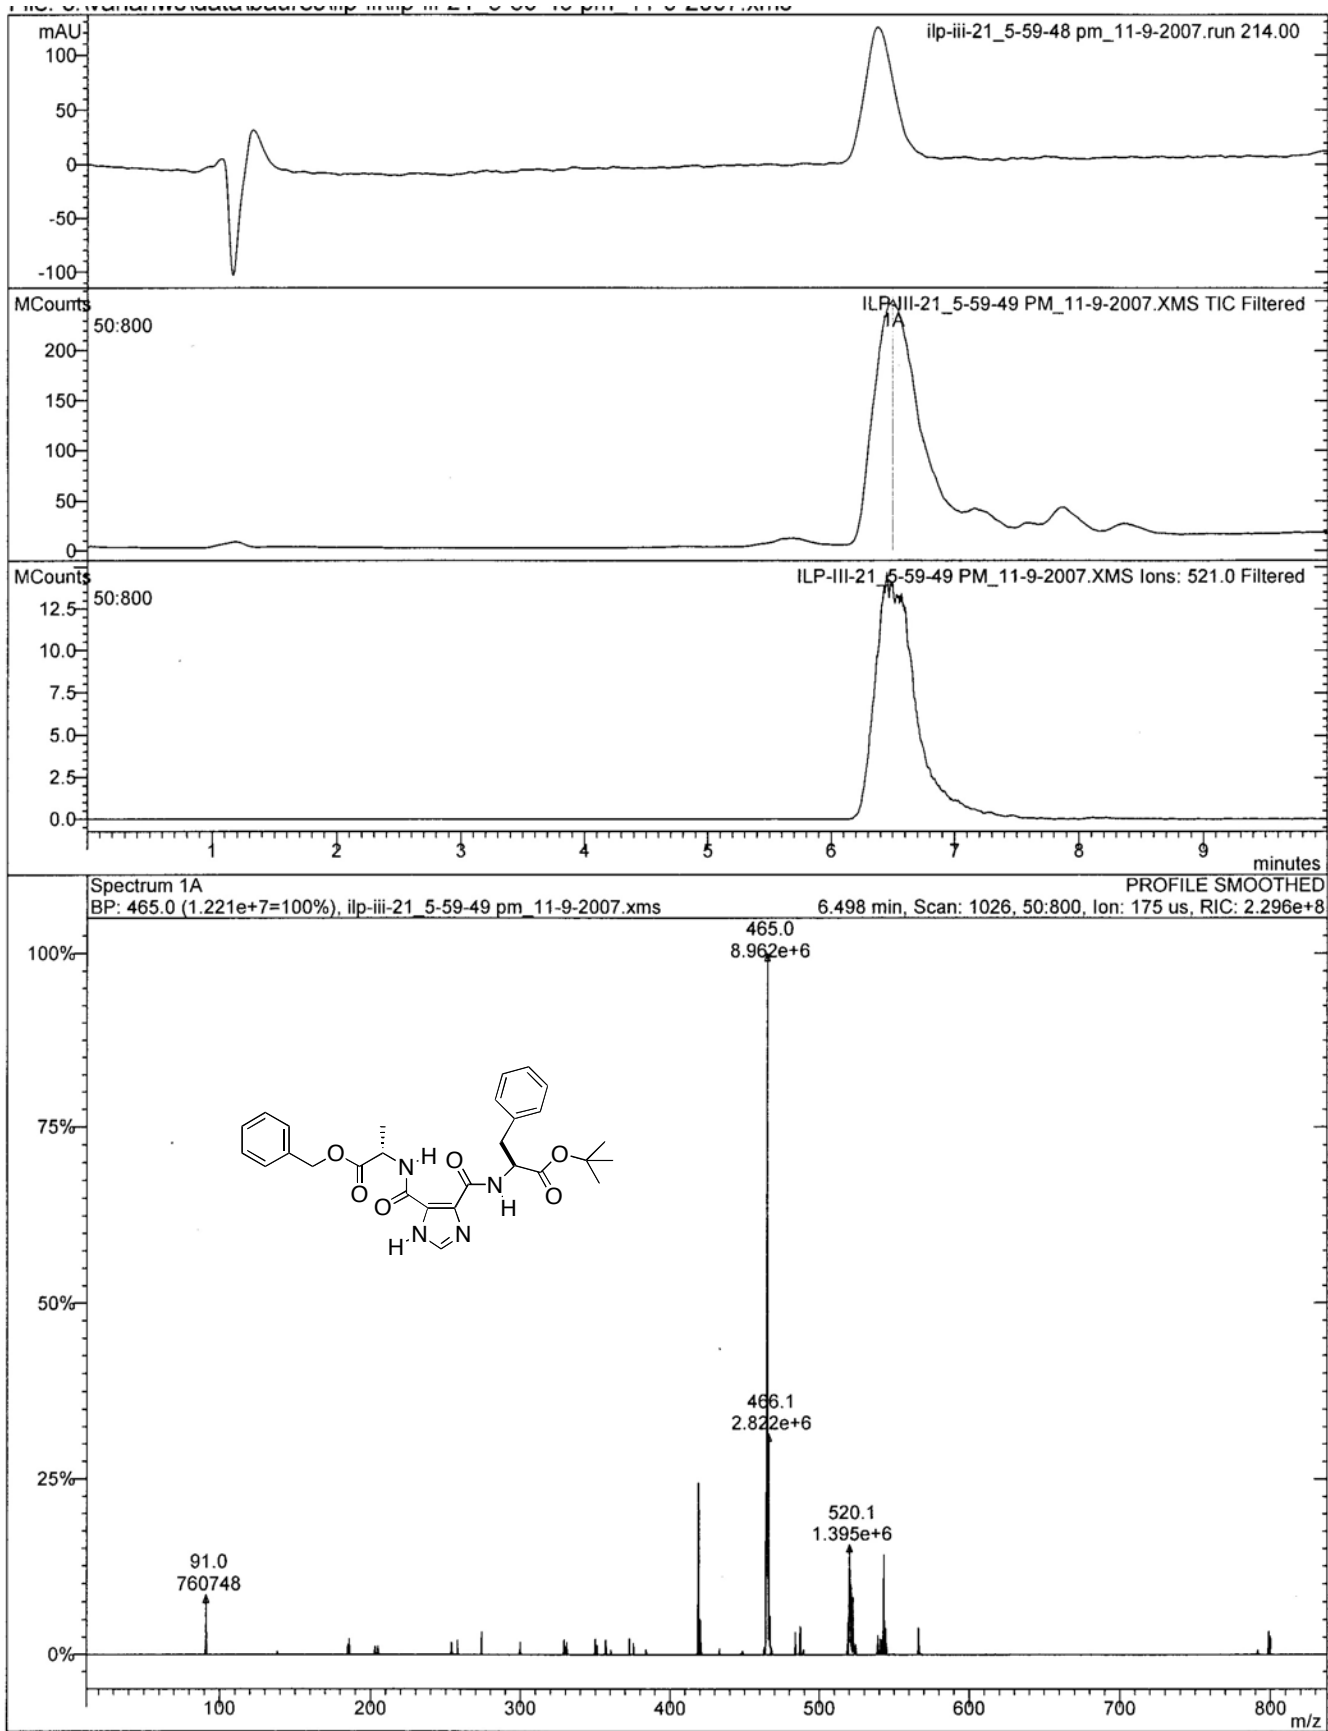

Figure S33. LC/MS data for 4{33}.

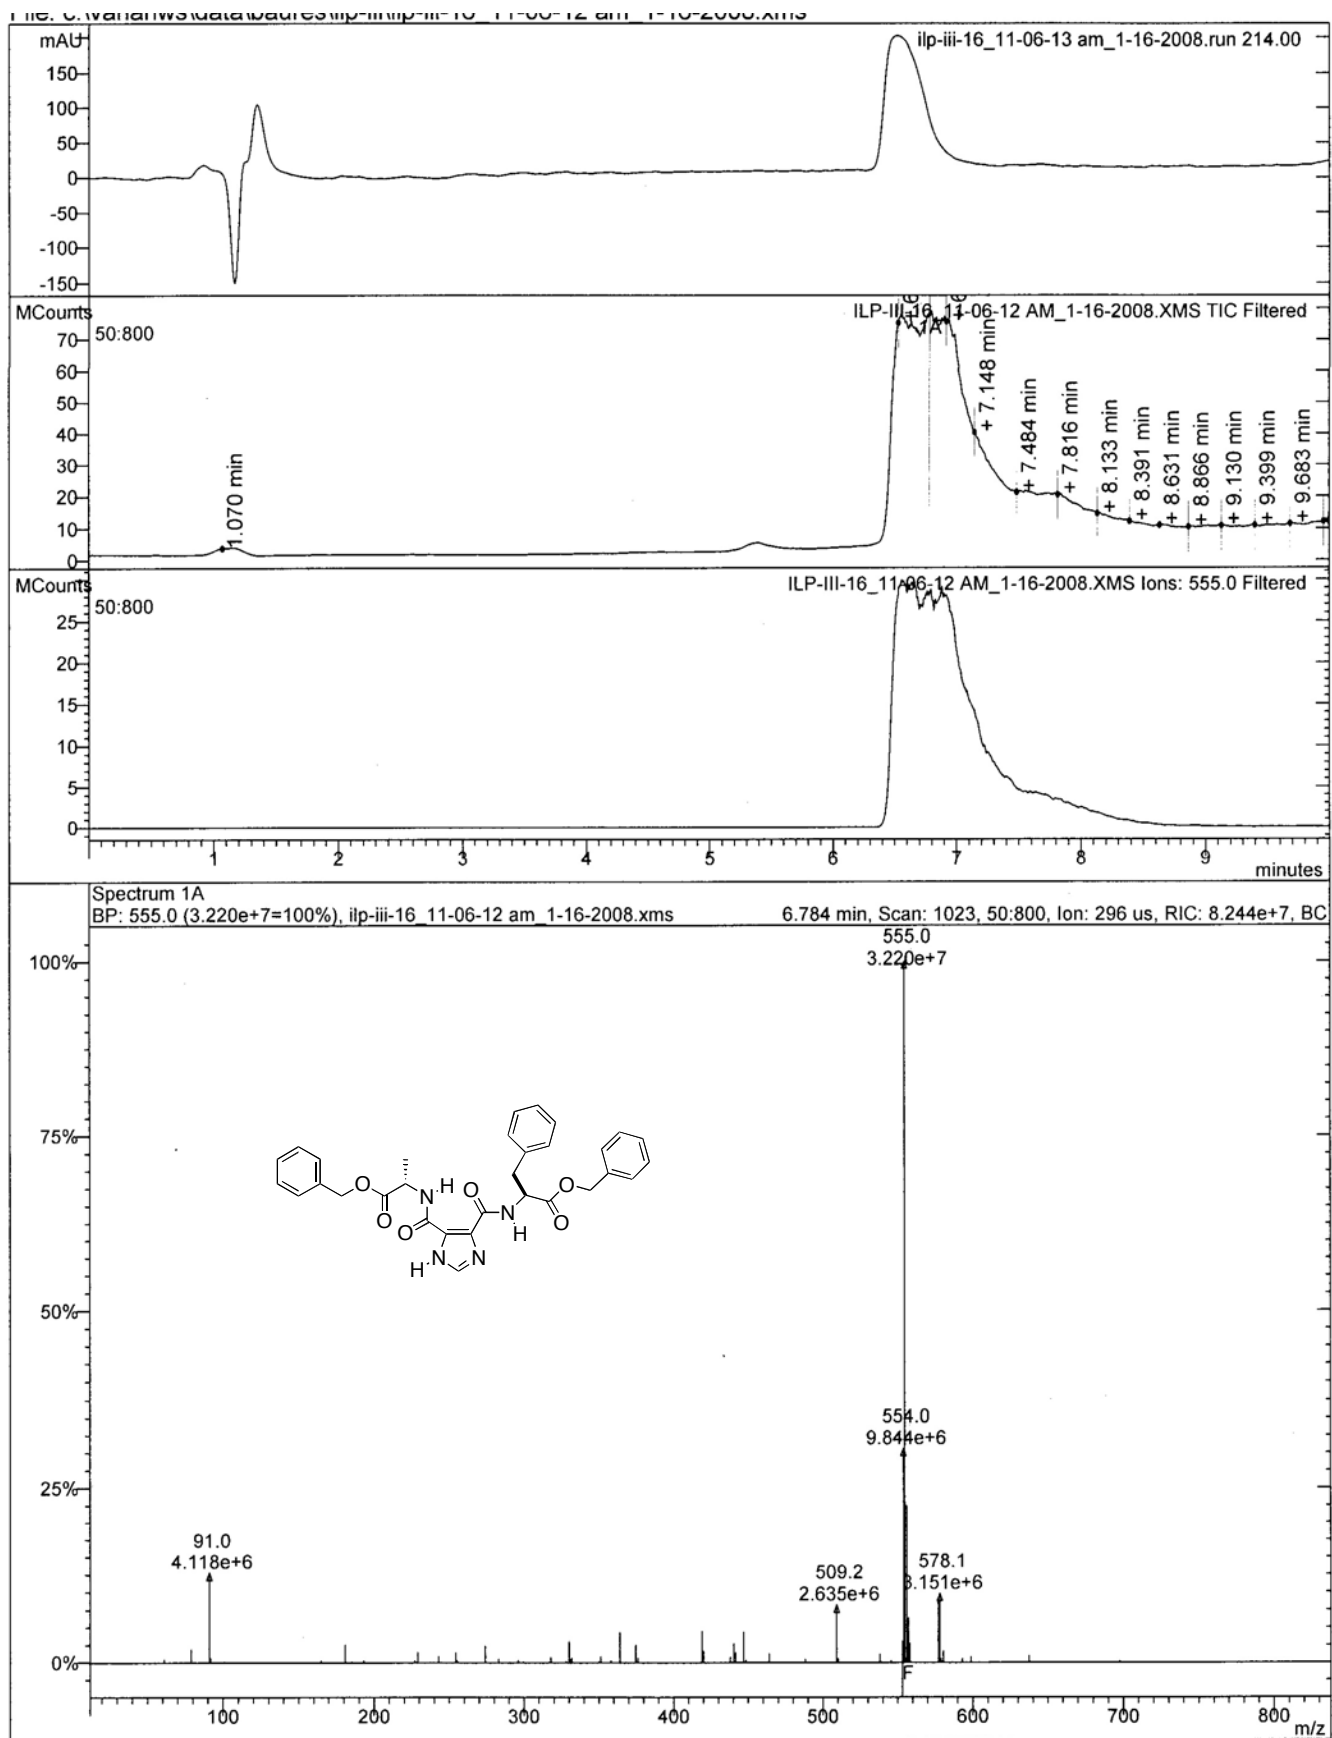

Figure S34. LC/MS data for 4{34}.



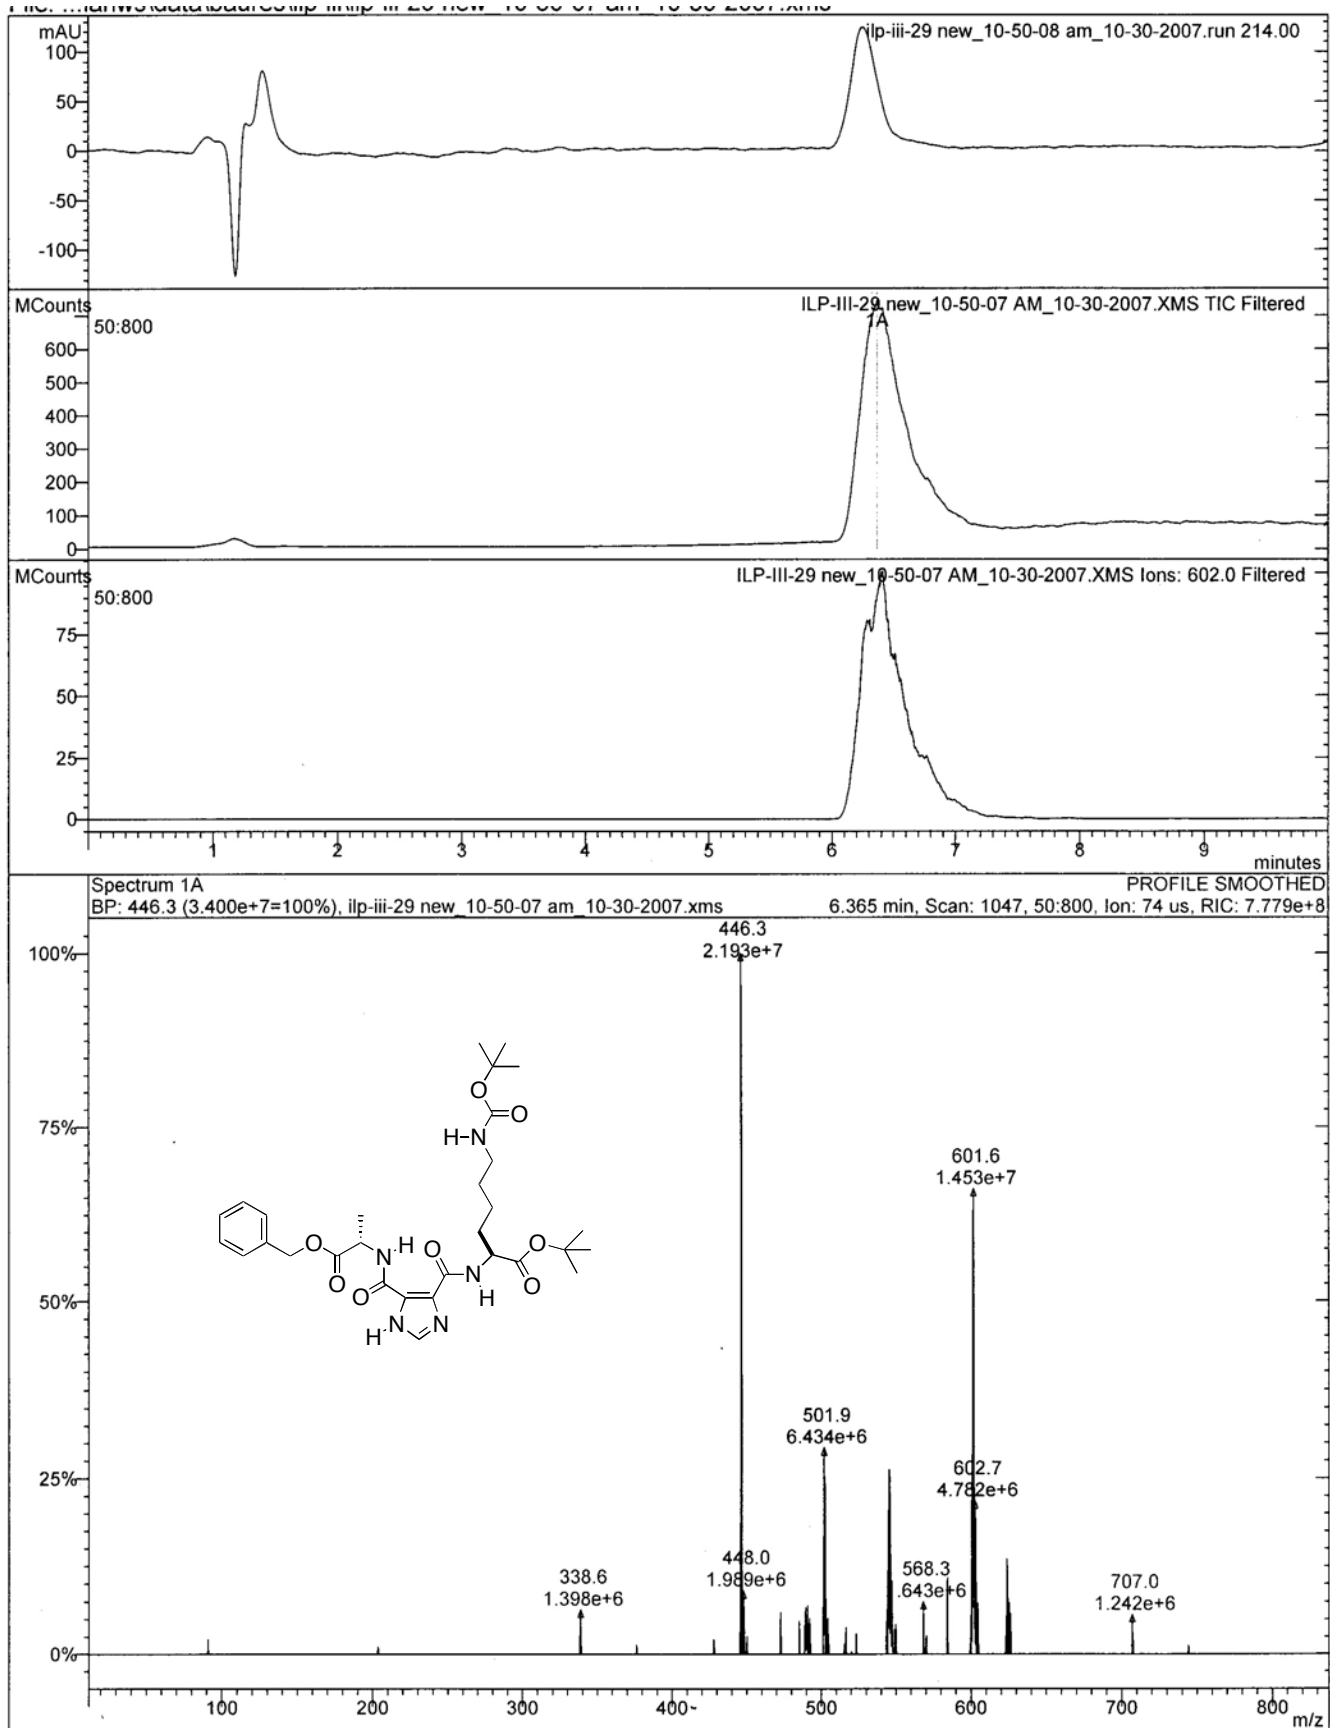

Figure S35. LC/MS data for 4{35}.

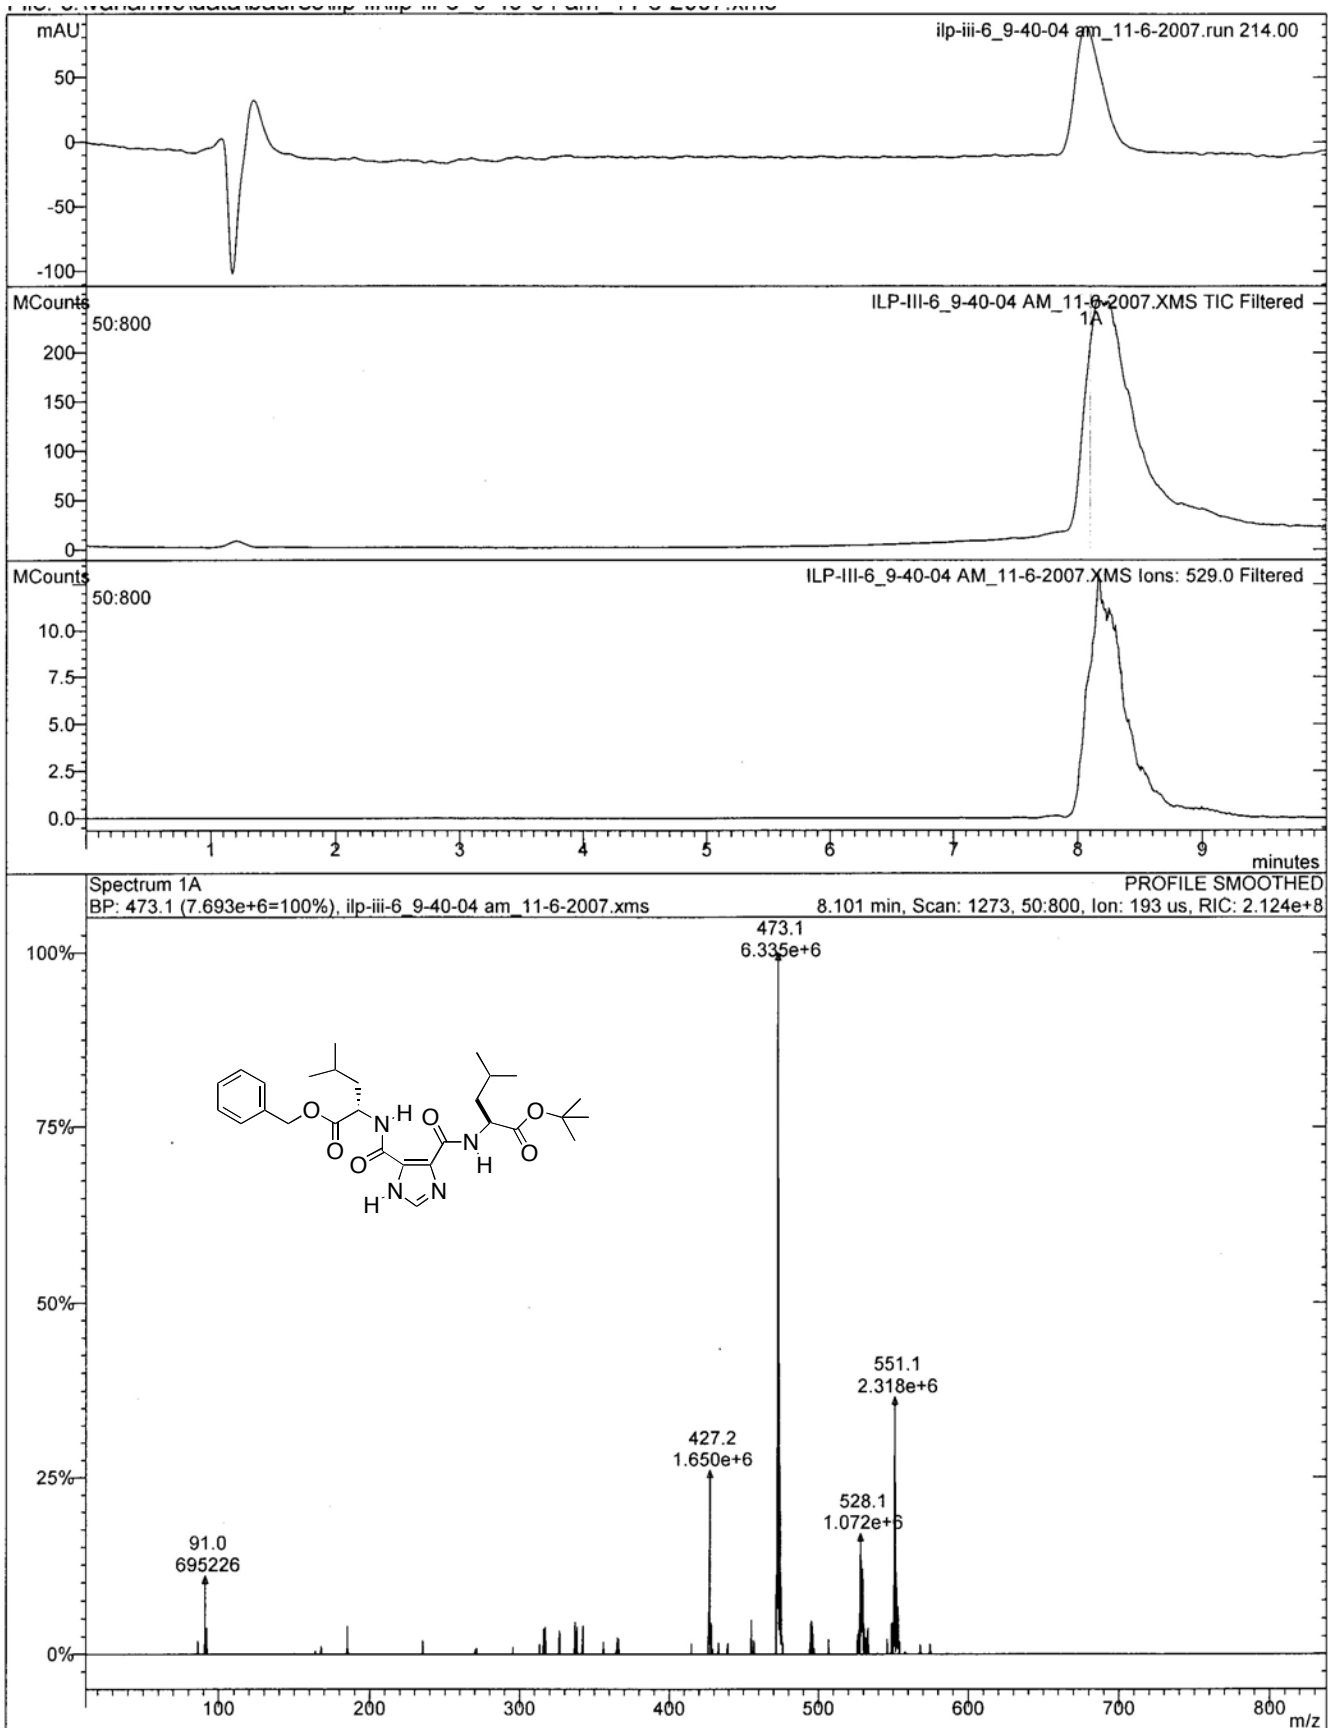

Figure S36. LC/MS data for 4{36}.

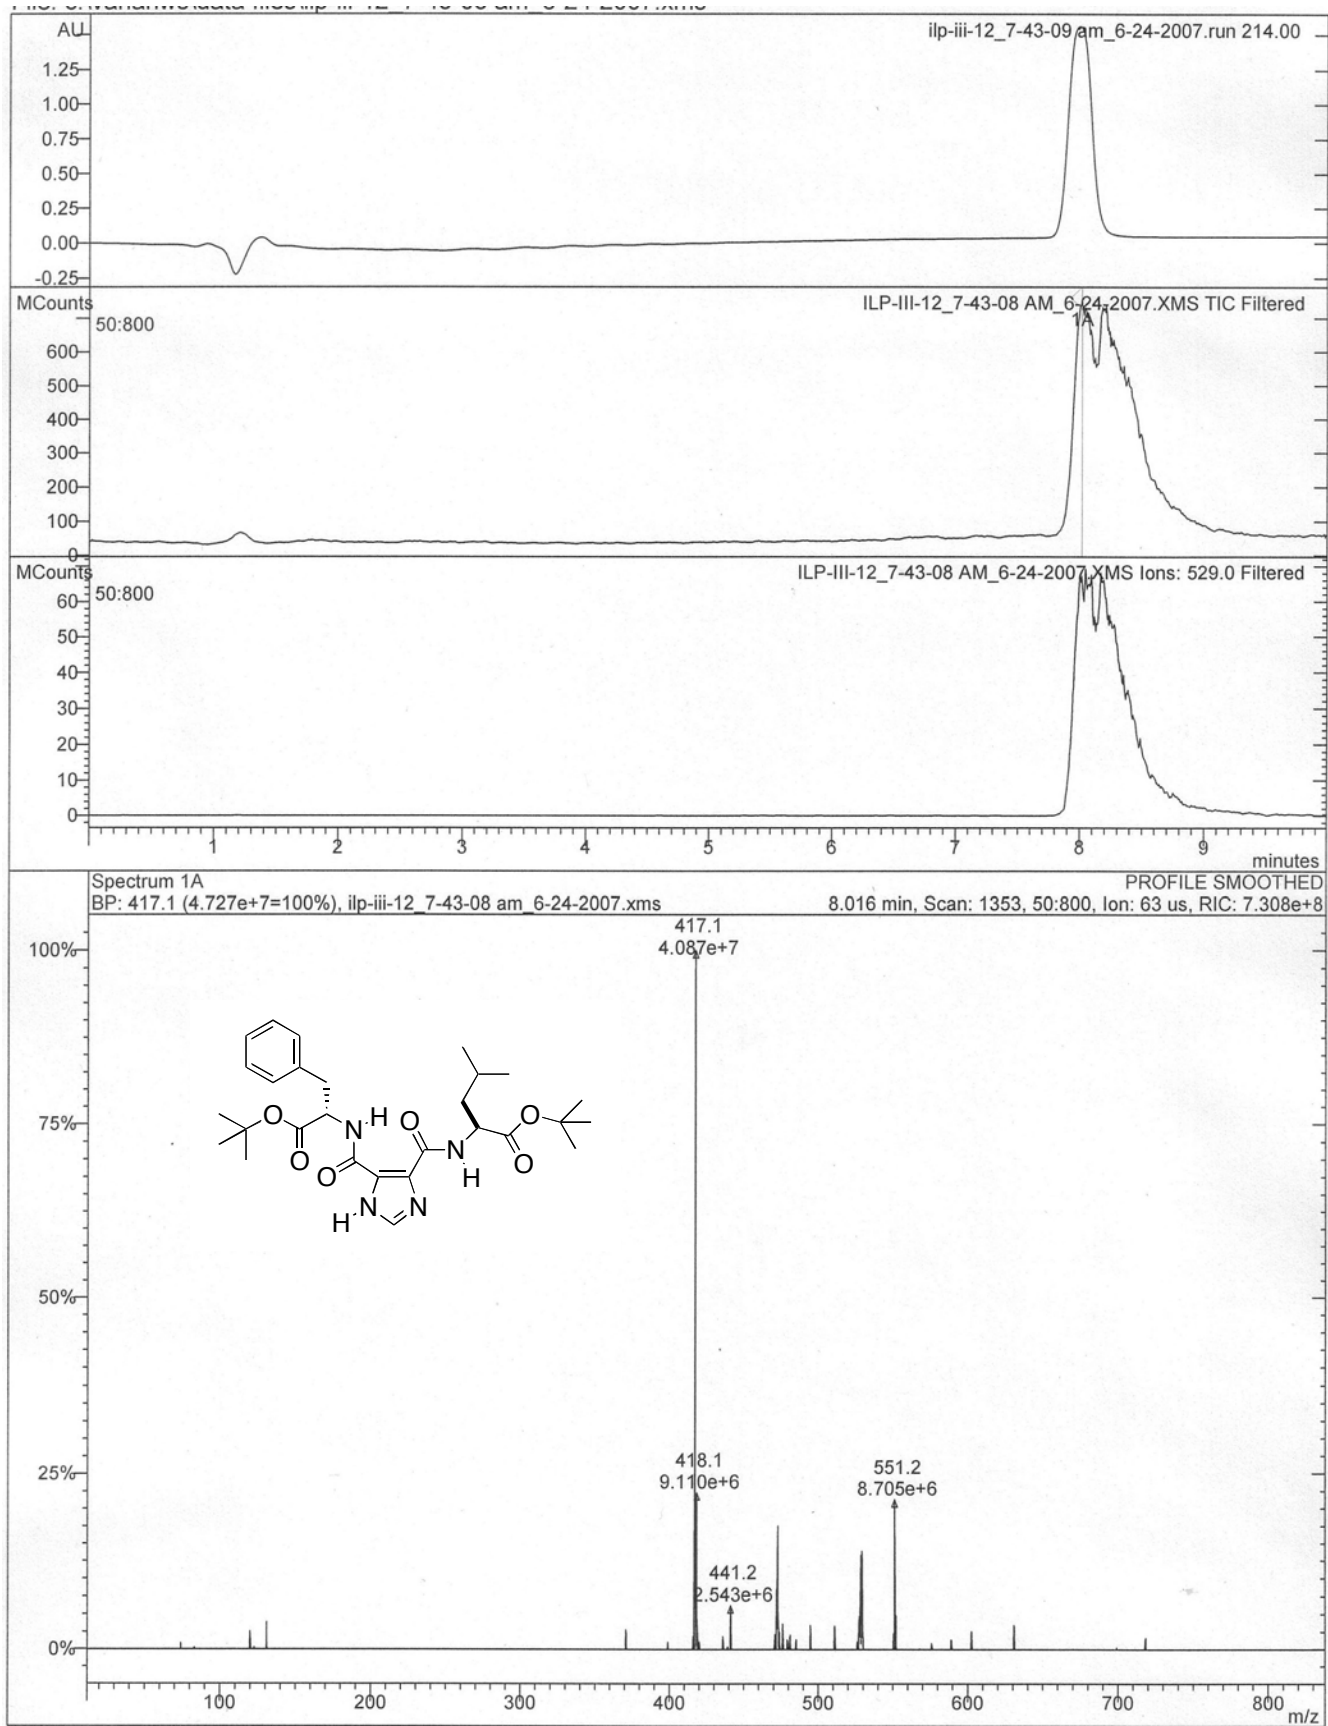

Figure S37. LC/MS data for 4{37}.

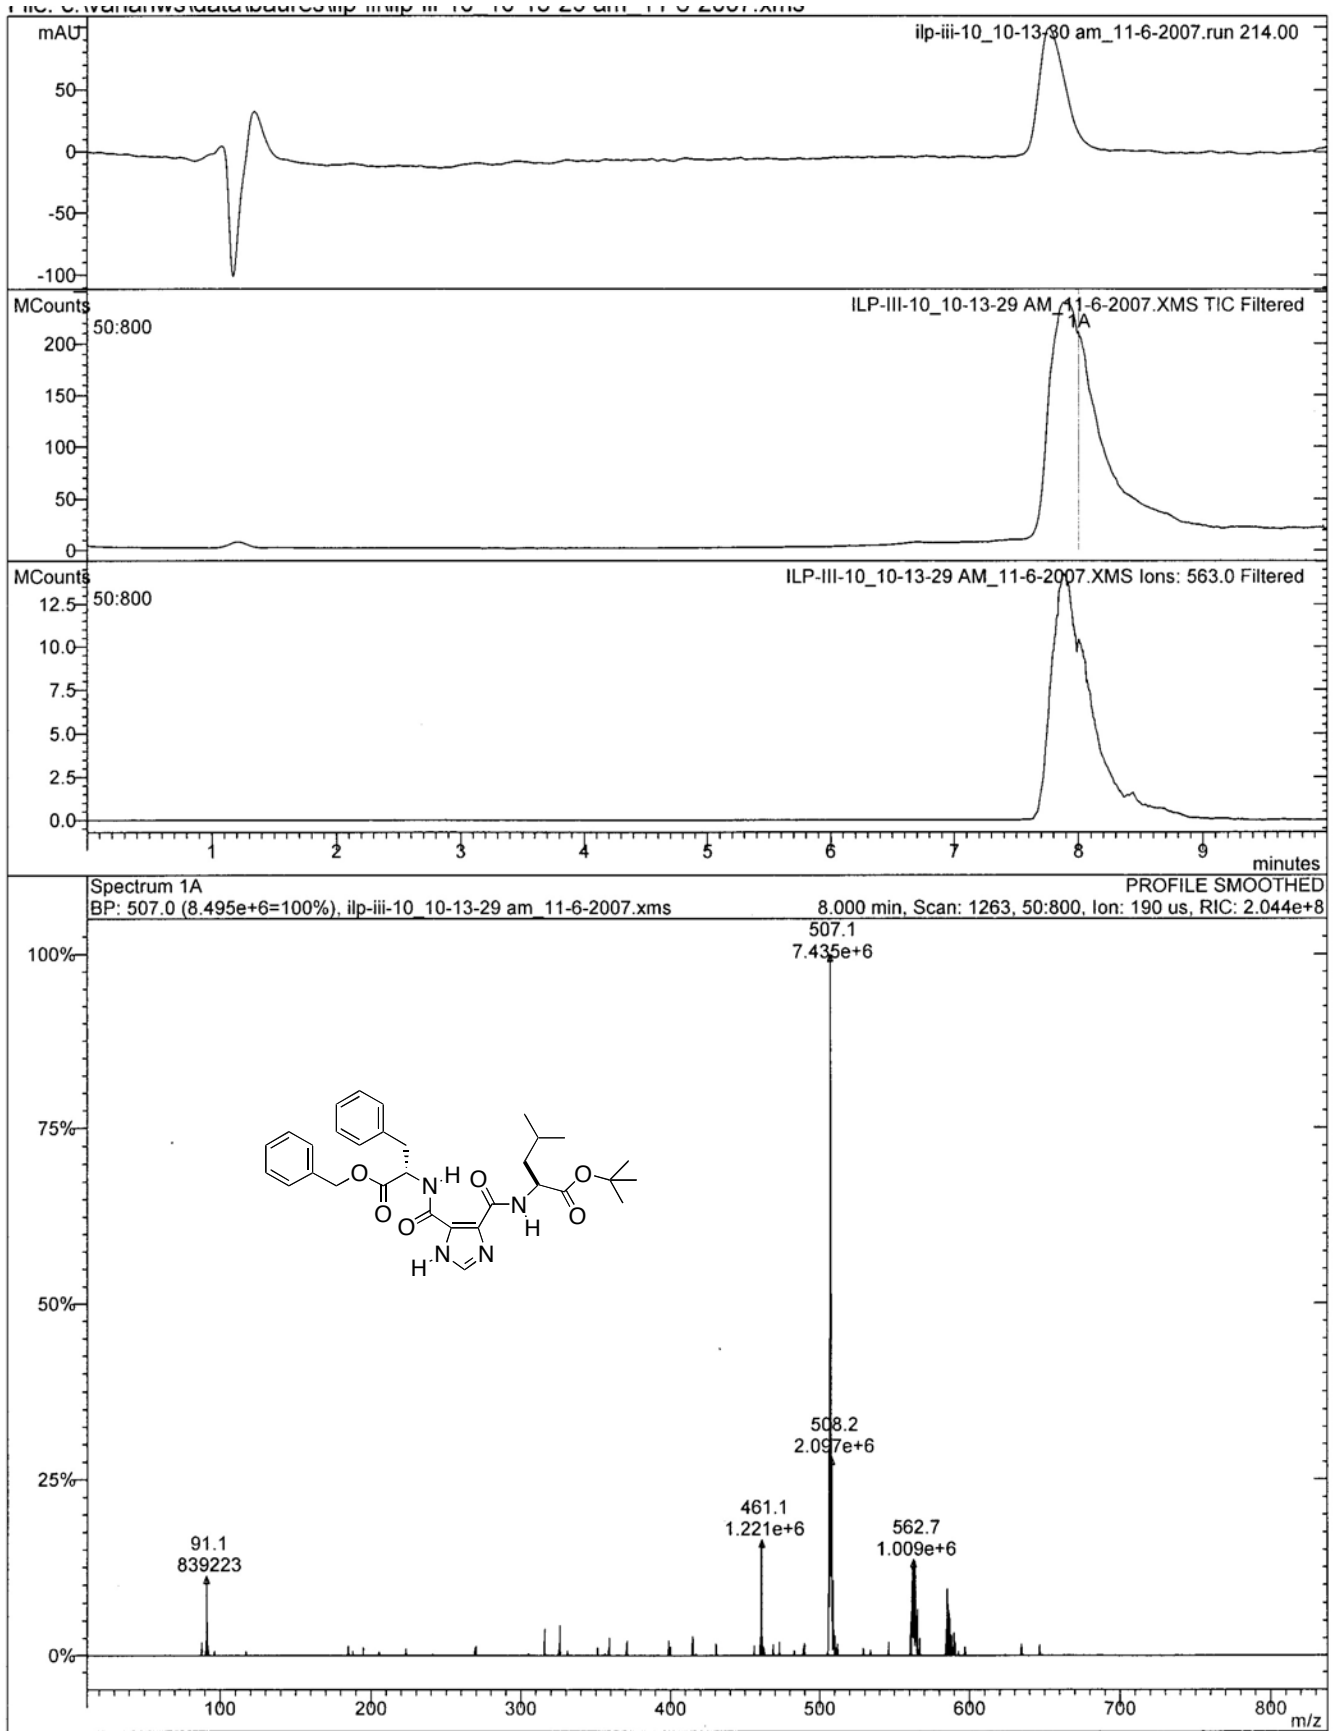

Figure S38. LC/MS data for 4{38}.

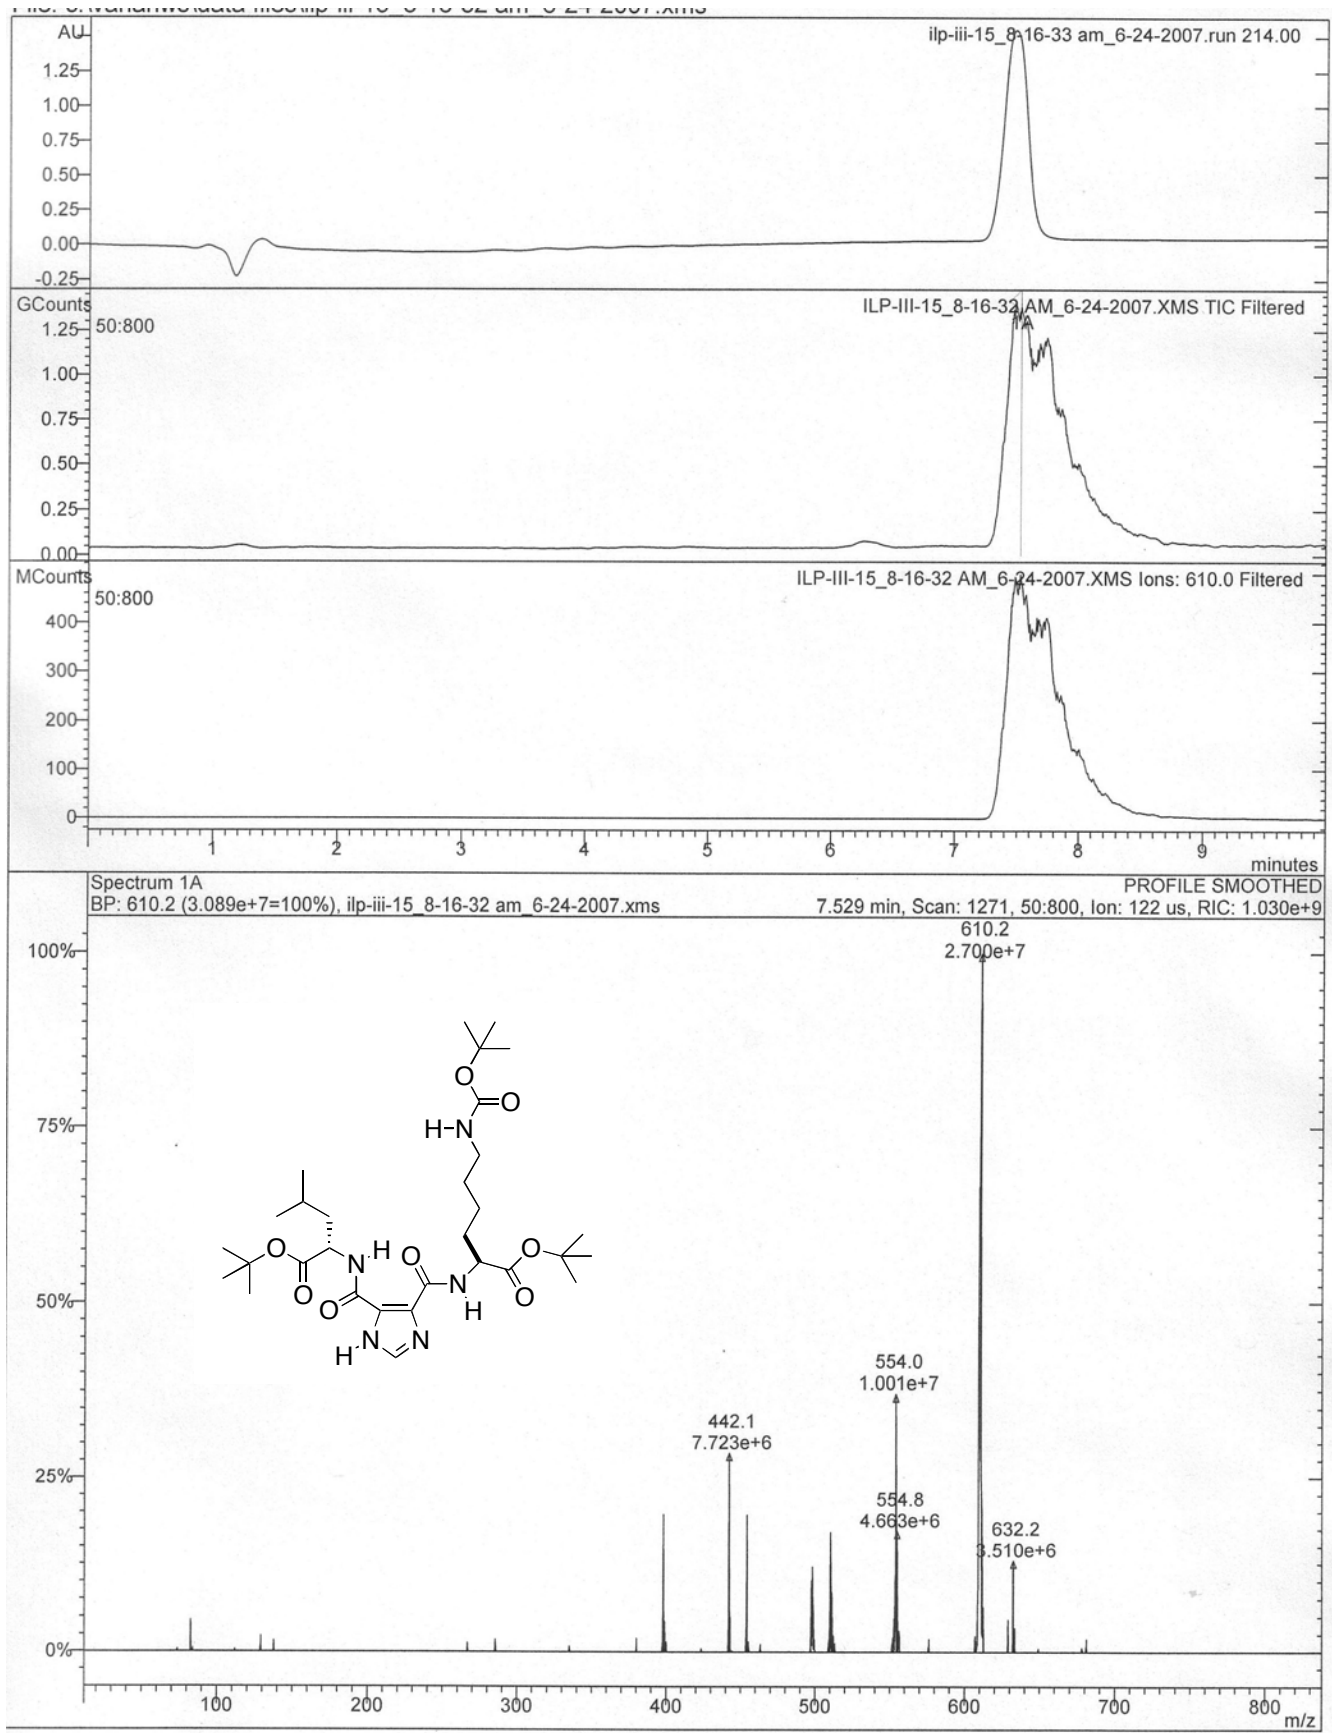

Figure S39. LC/MS data for 4{39}.

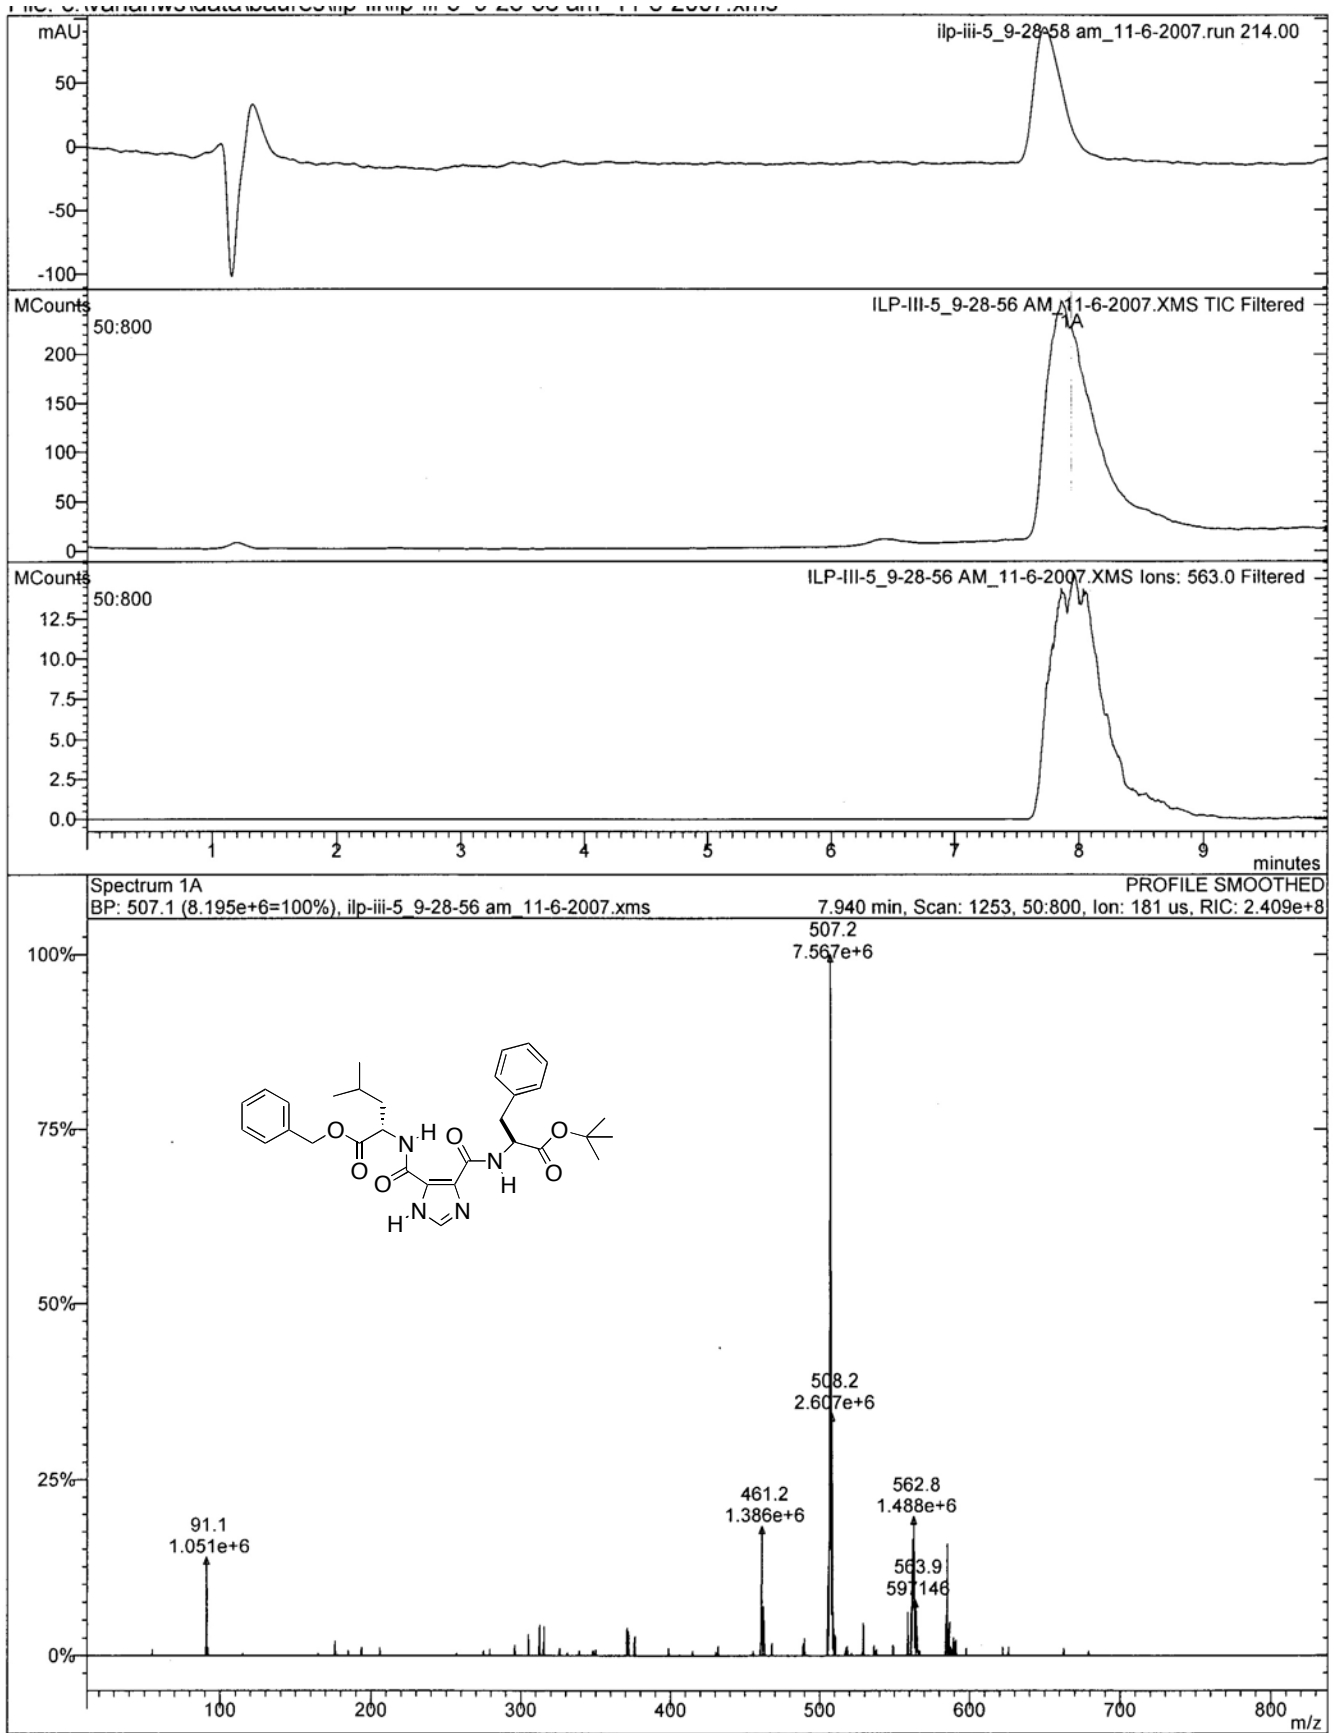

Figure S40. LC/MS data for 4{40}.

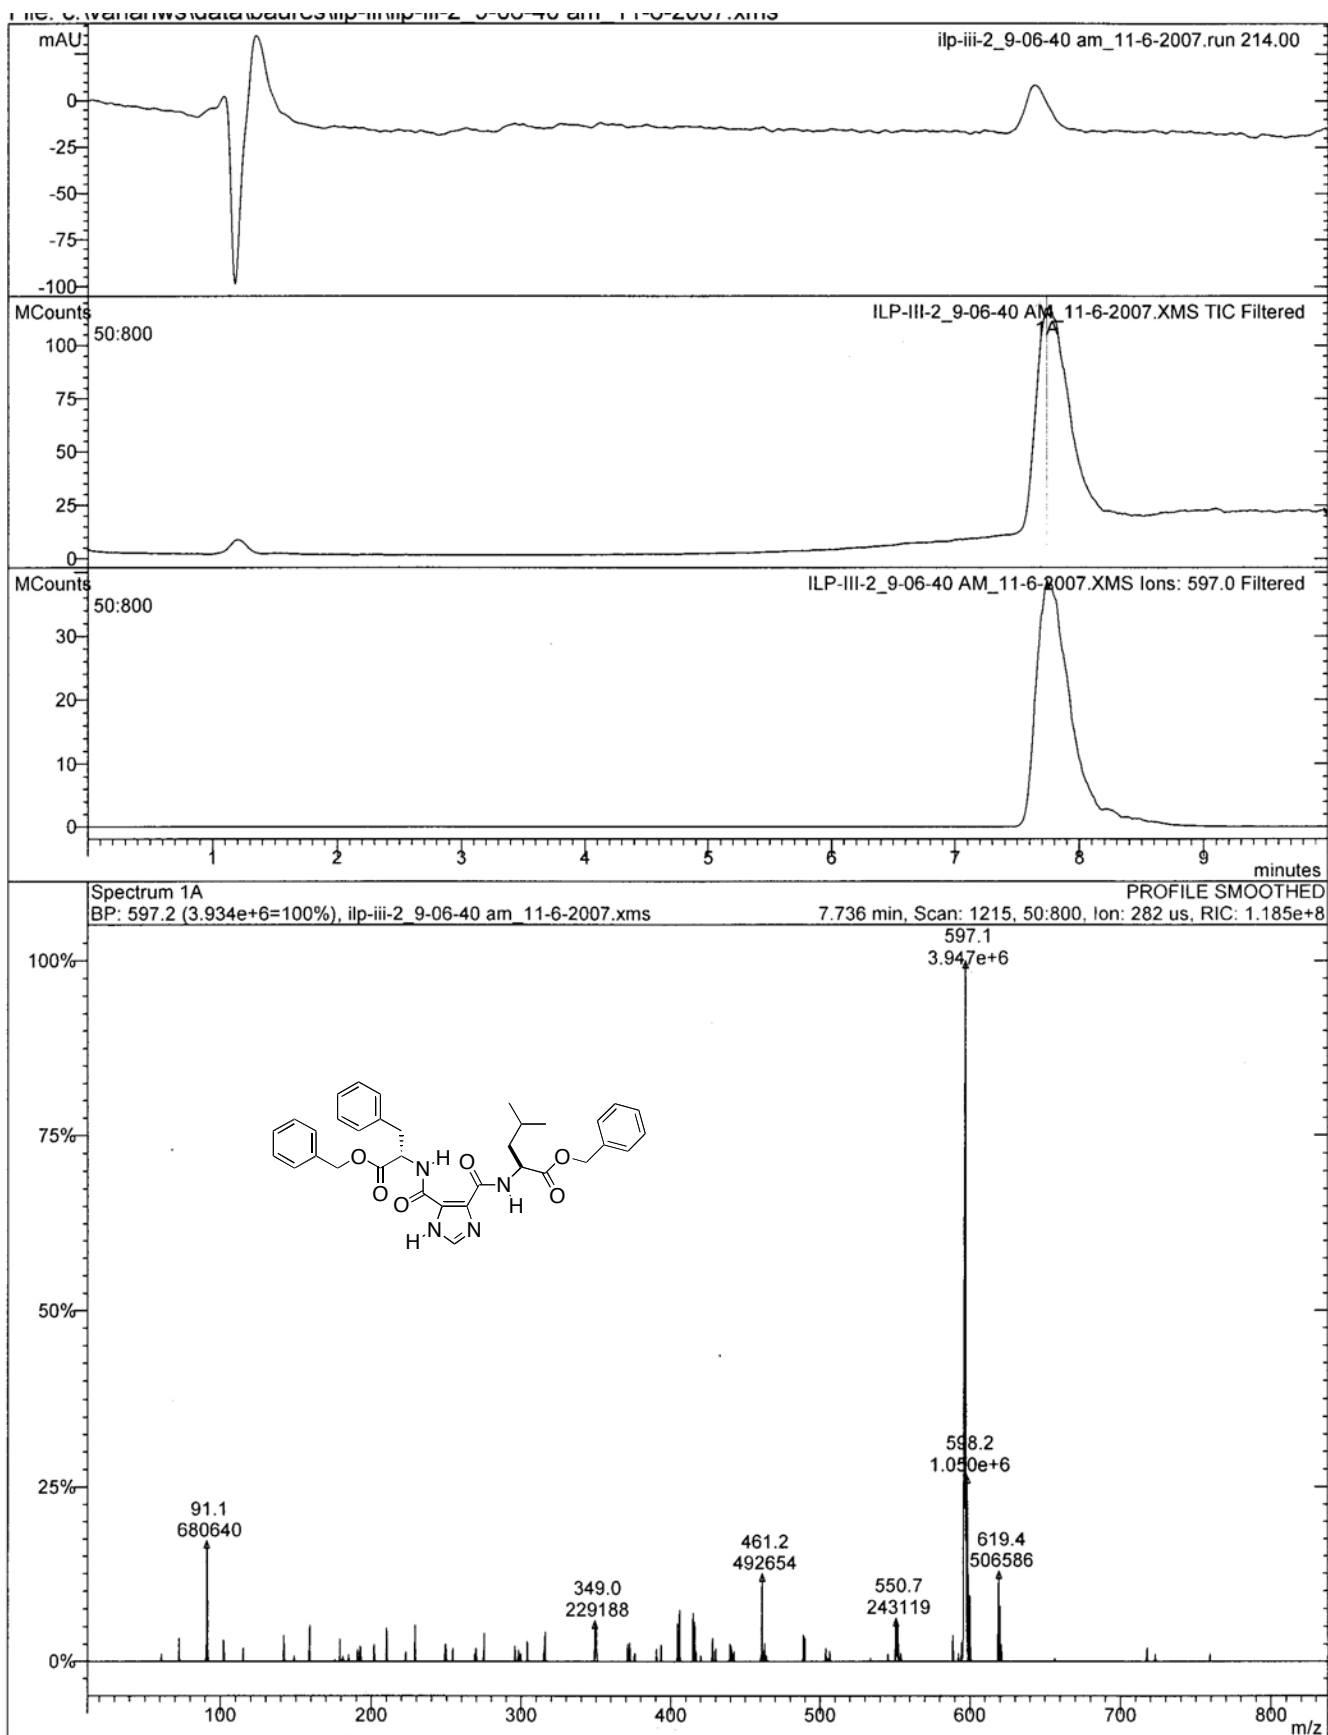

Figure S41. LC/MS data for 4{41}.

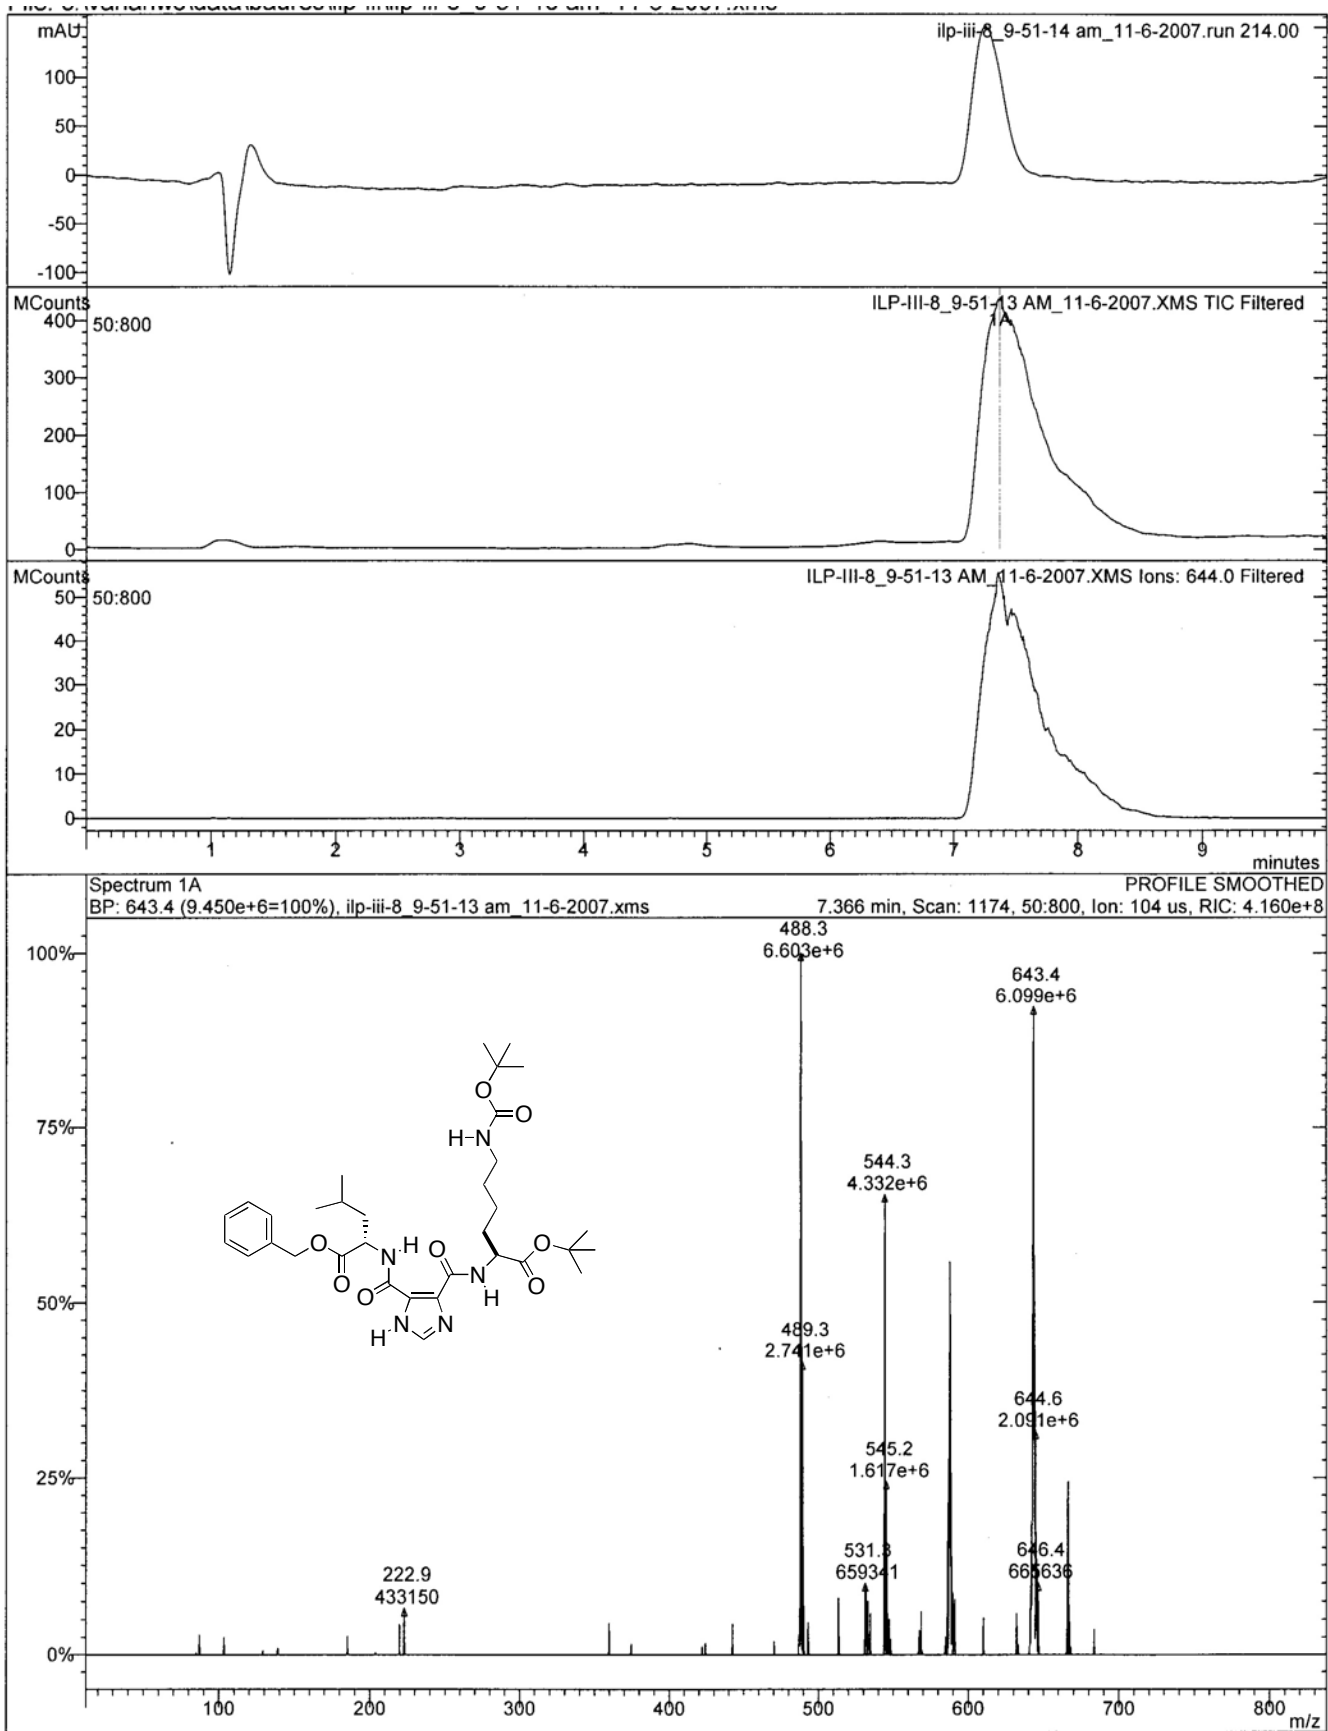

Figure S42. LC/MS data for 4{42}.



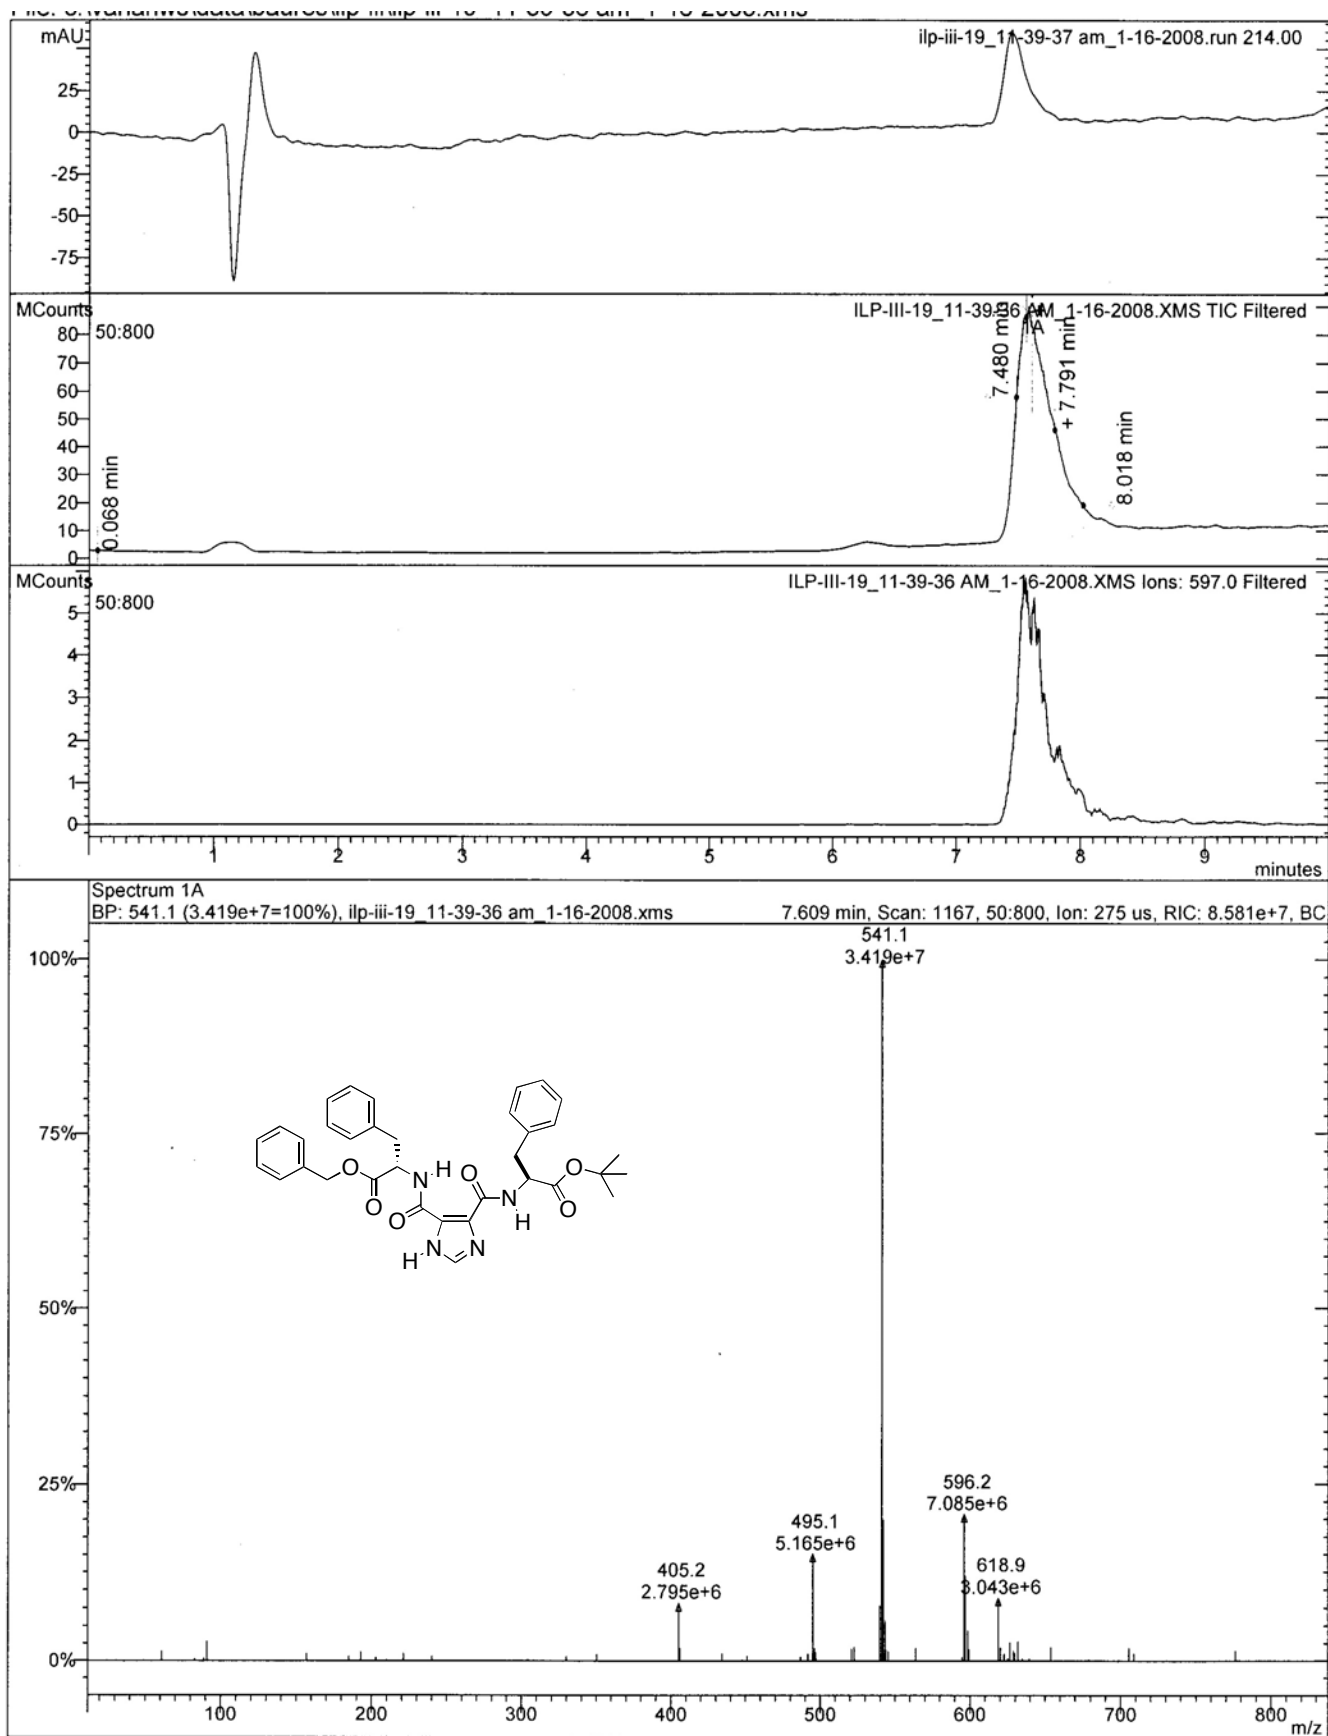

Figure S43. LC/MS data for 4{43}.

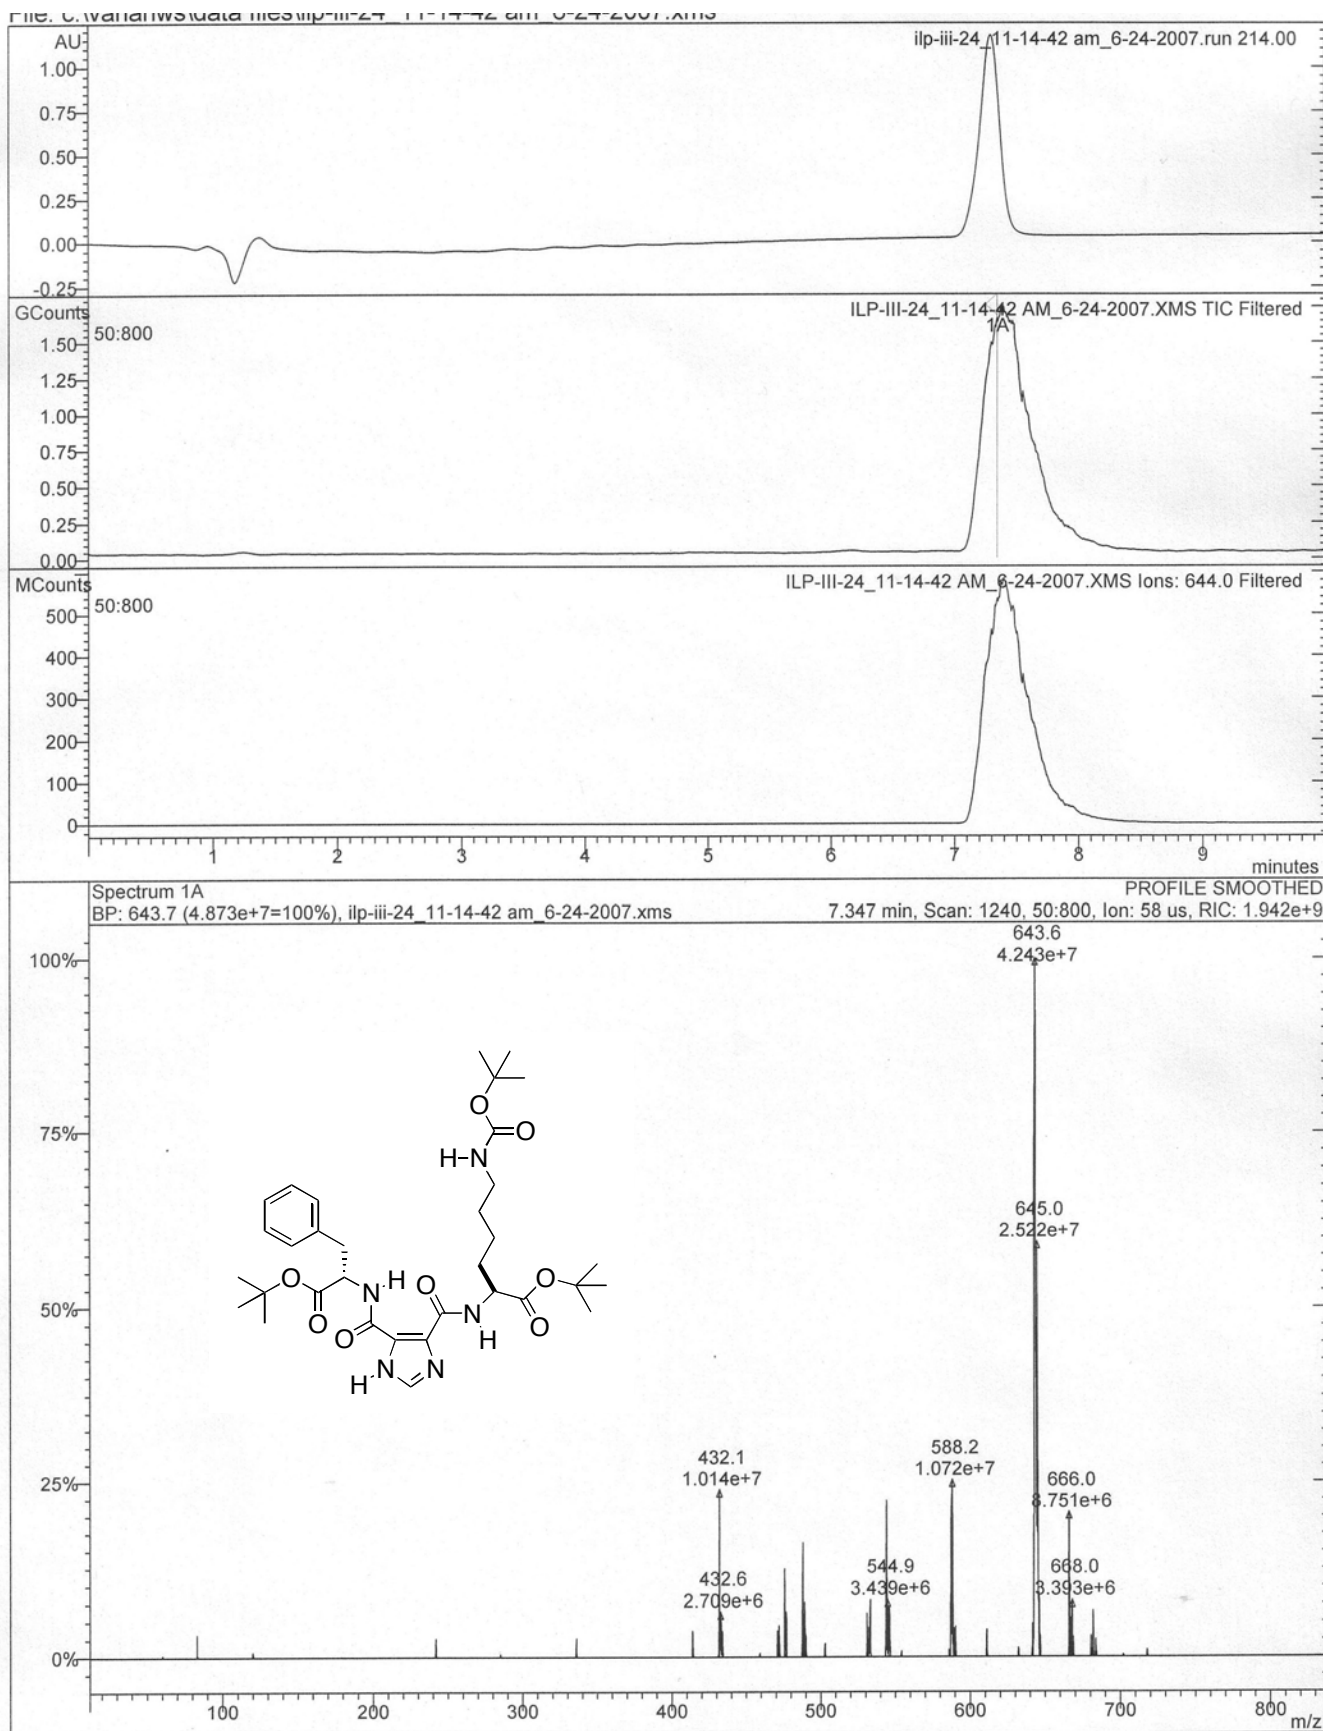

Figure S44. LC/MS data for 4{44}.

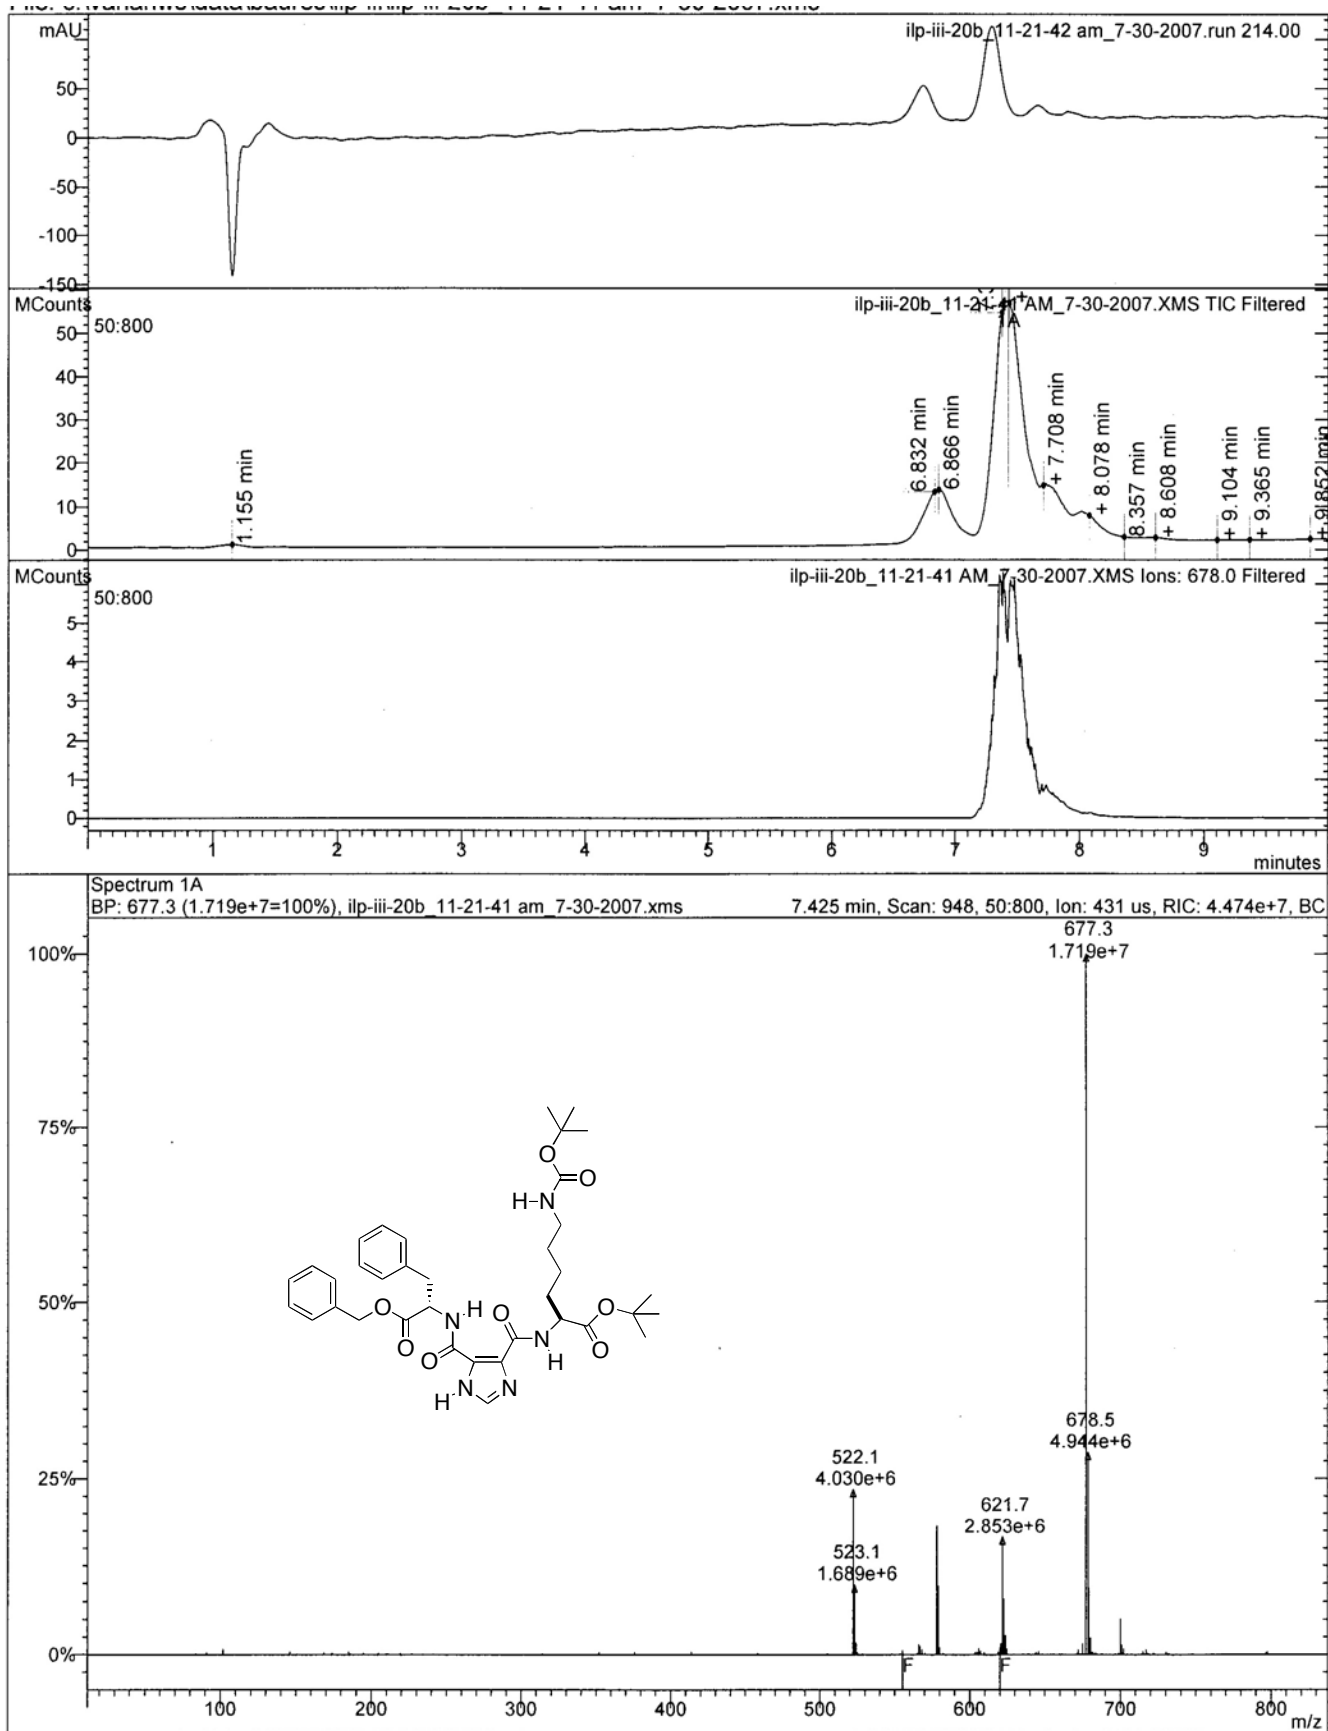

Figure S45. LC/MS data for 4{45}.

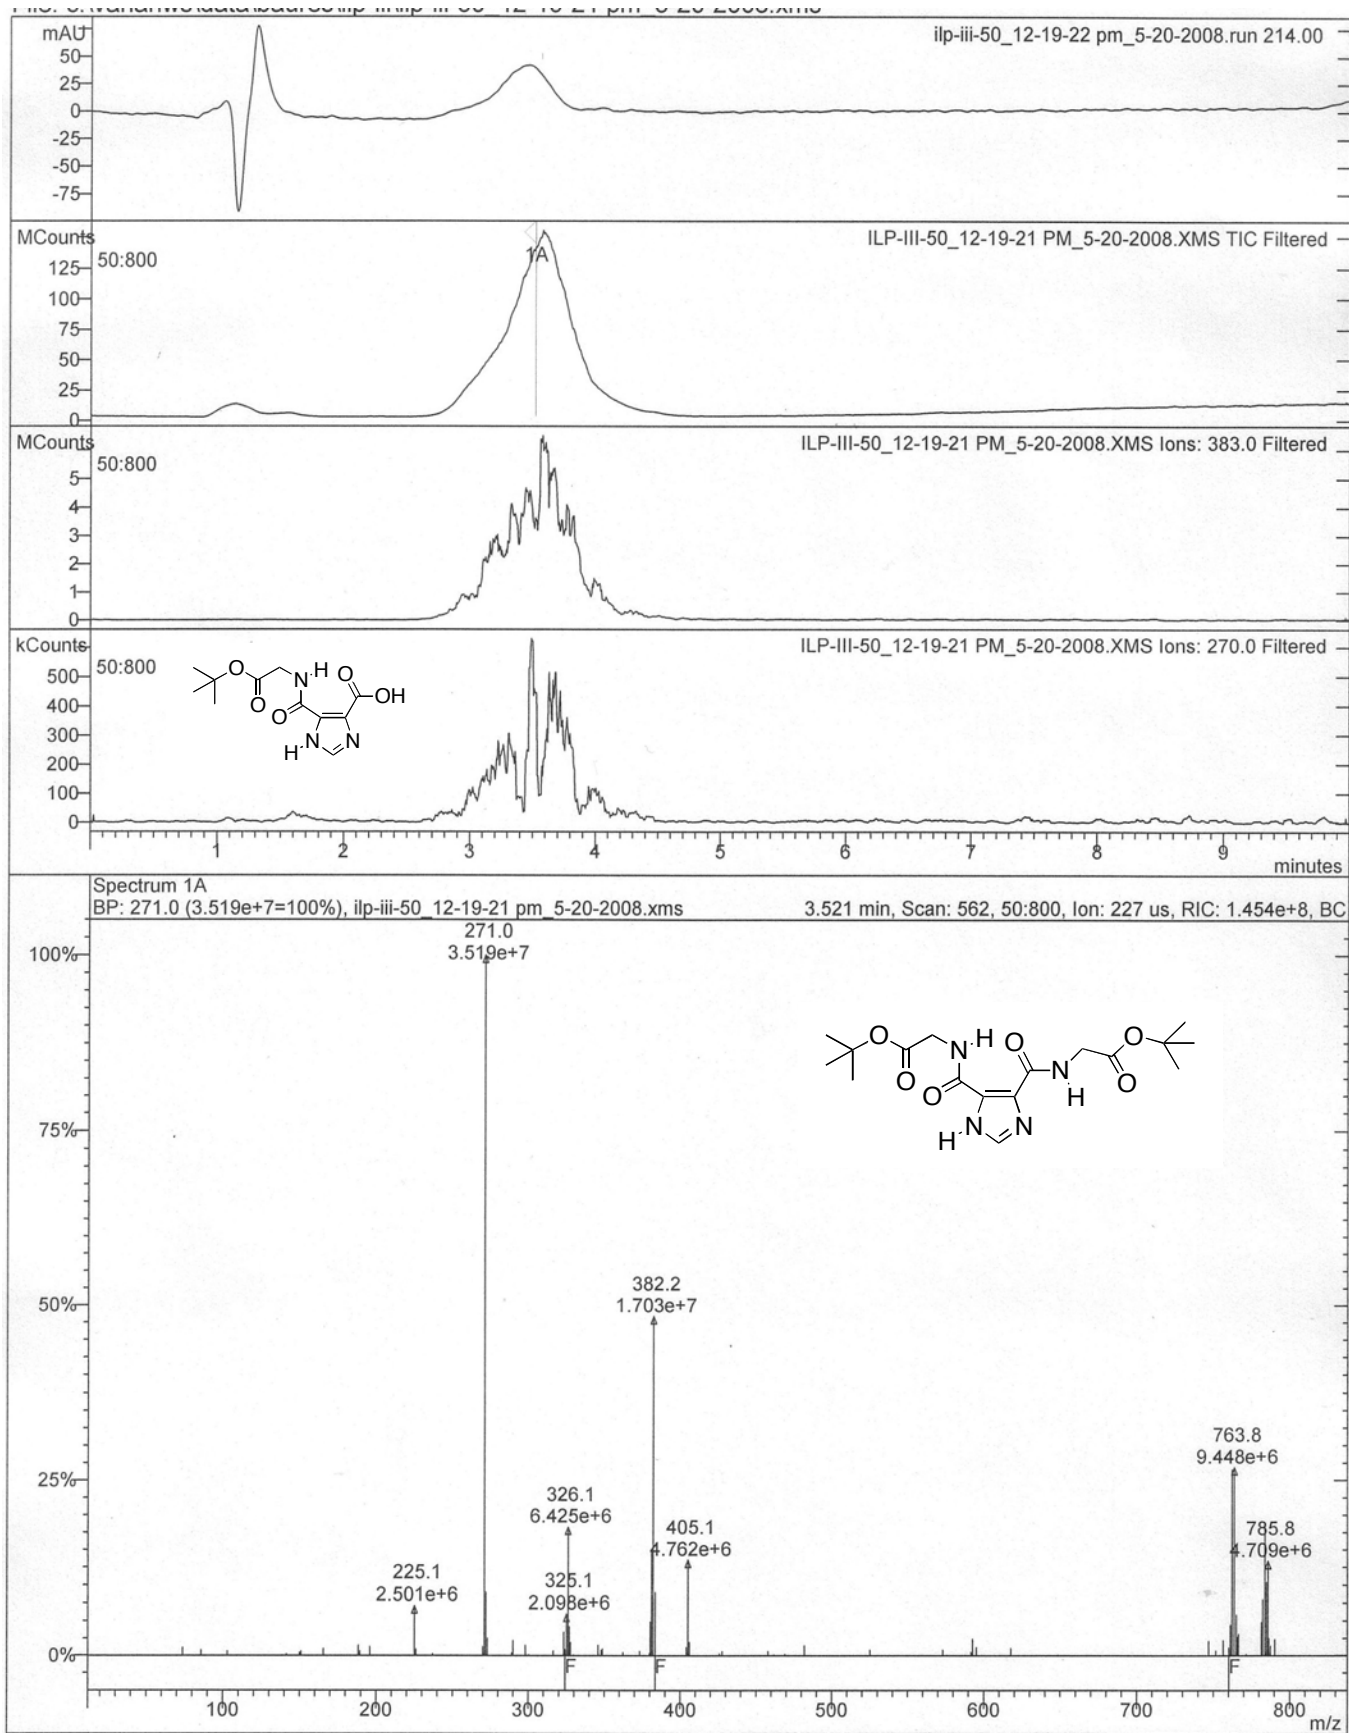

Figure S46. LC/MS data for the crude reaction to yield 4{1}.
