# Supplementary material
Source: PubMed Central journal article supplement (PMC6254018)
Supplement: molecules-14-00352-s003.pdf [file molecules-14-00352-s003.pdf]

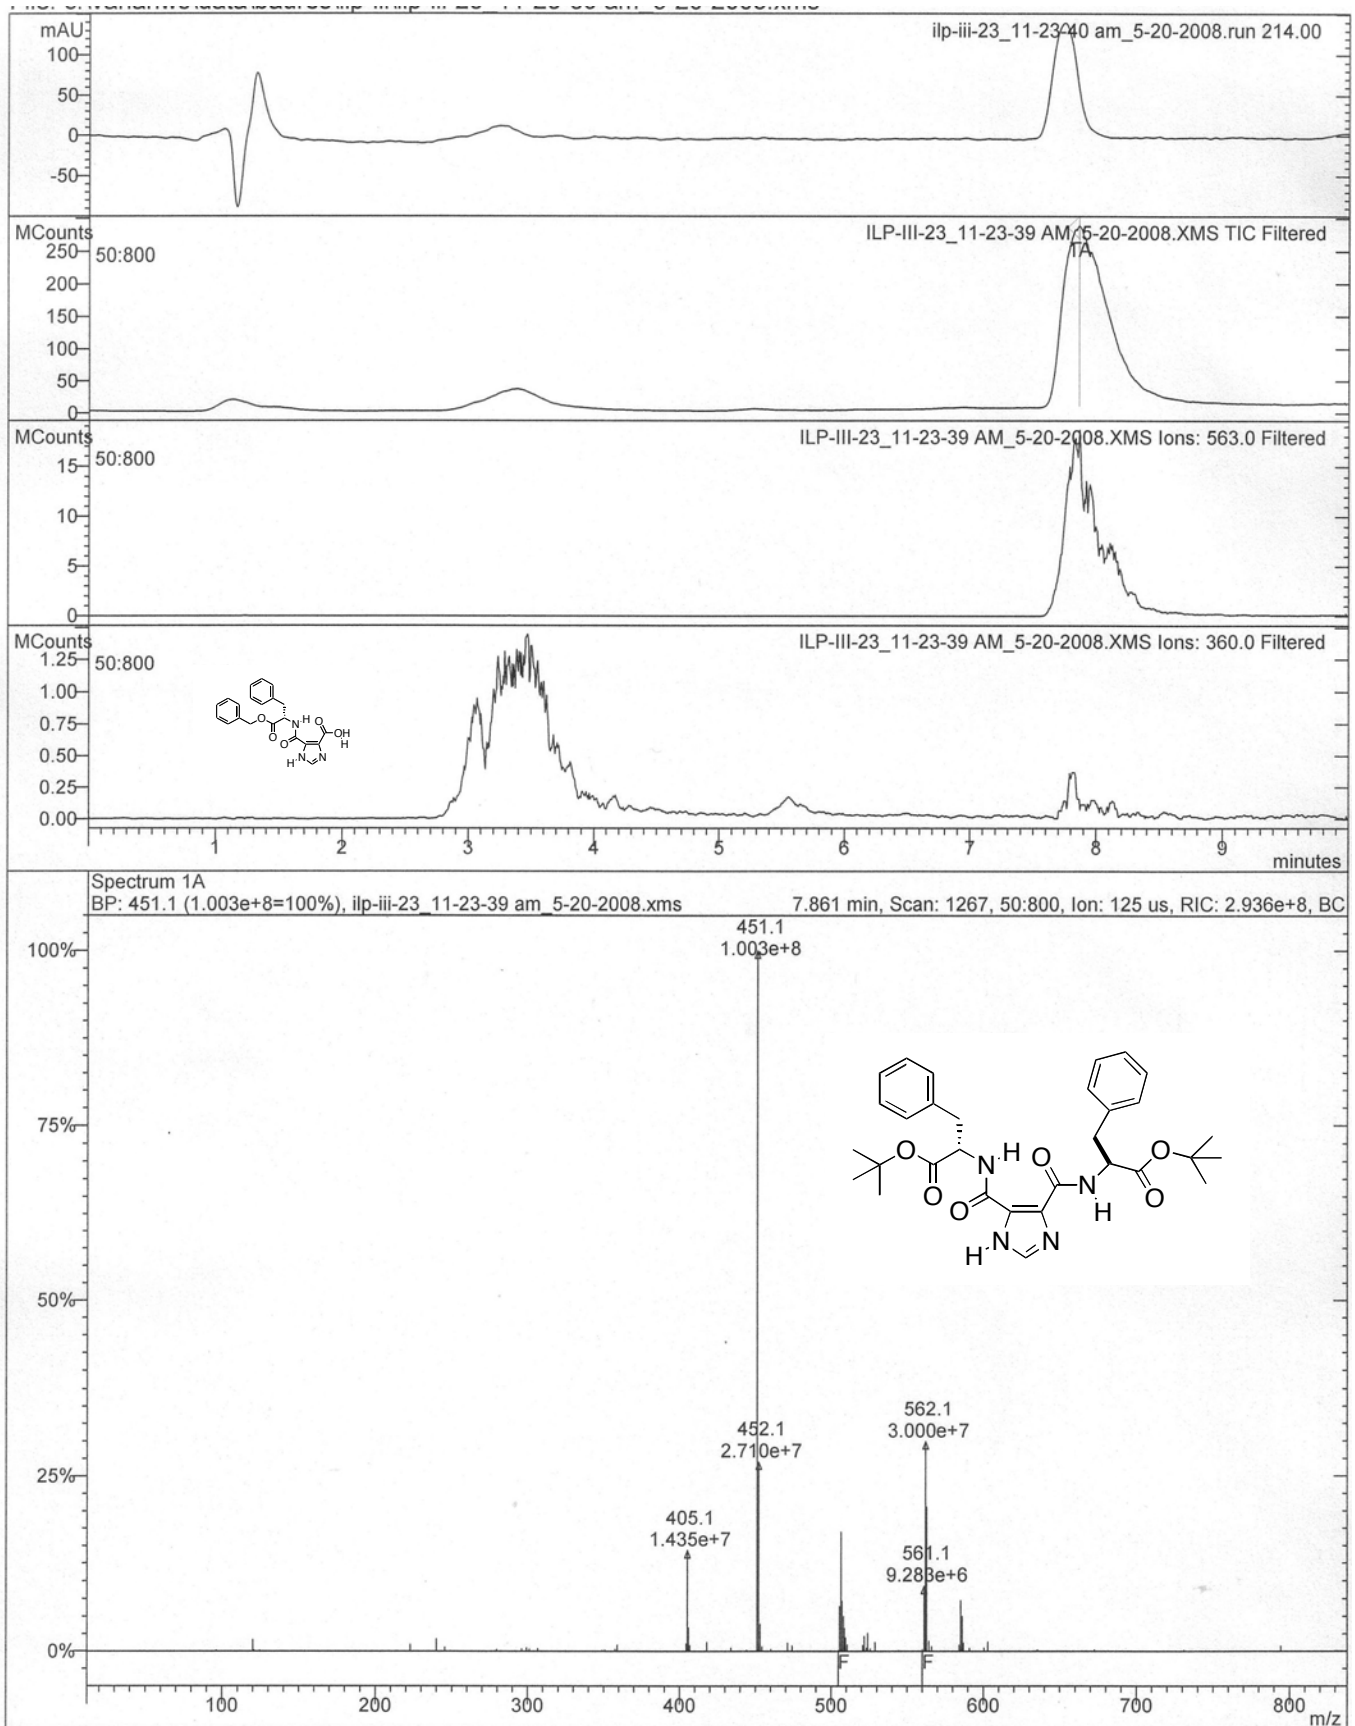

Figure S47. LC/MS data for the crude reaction to yield 4{7}.

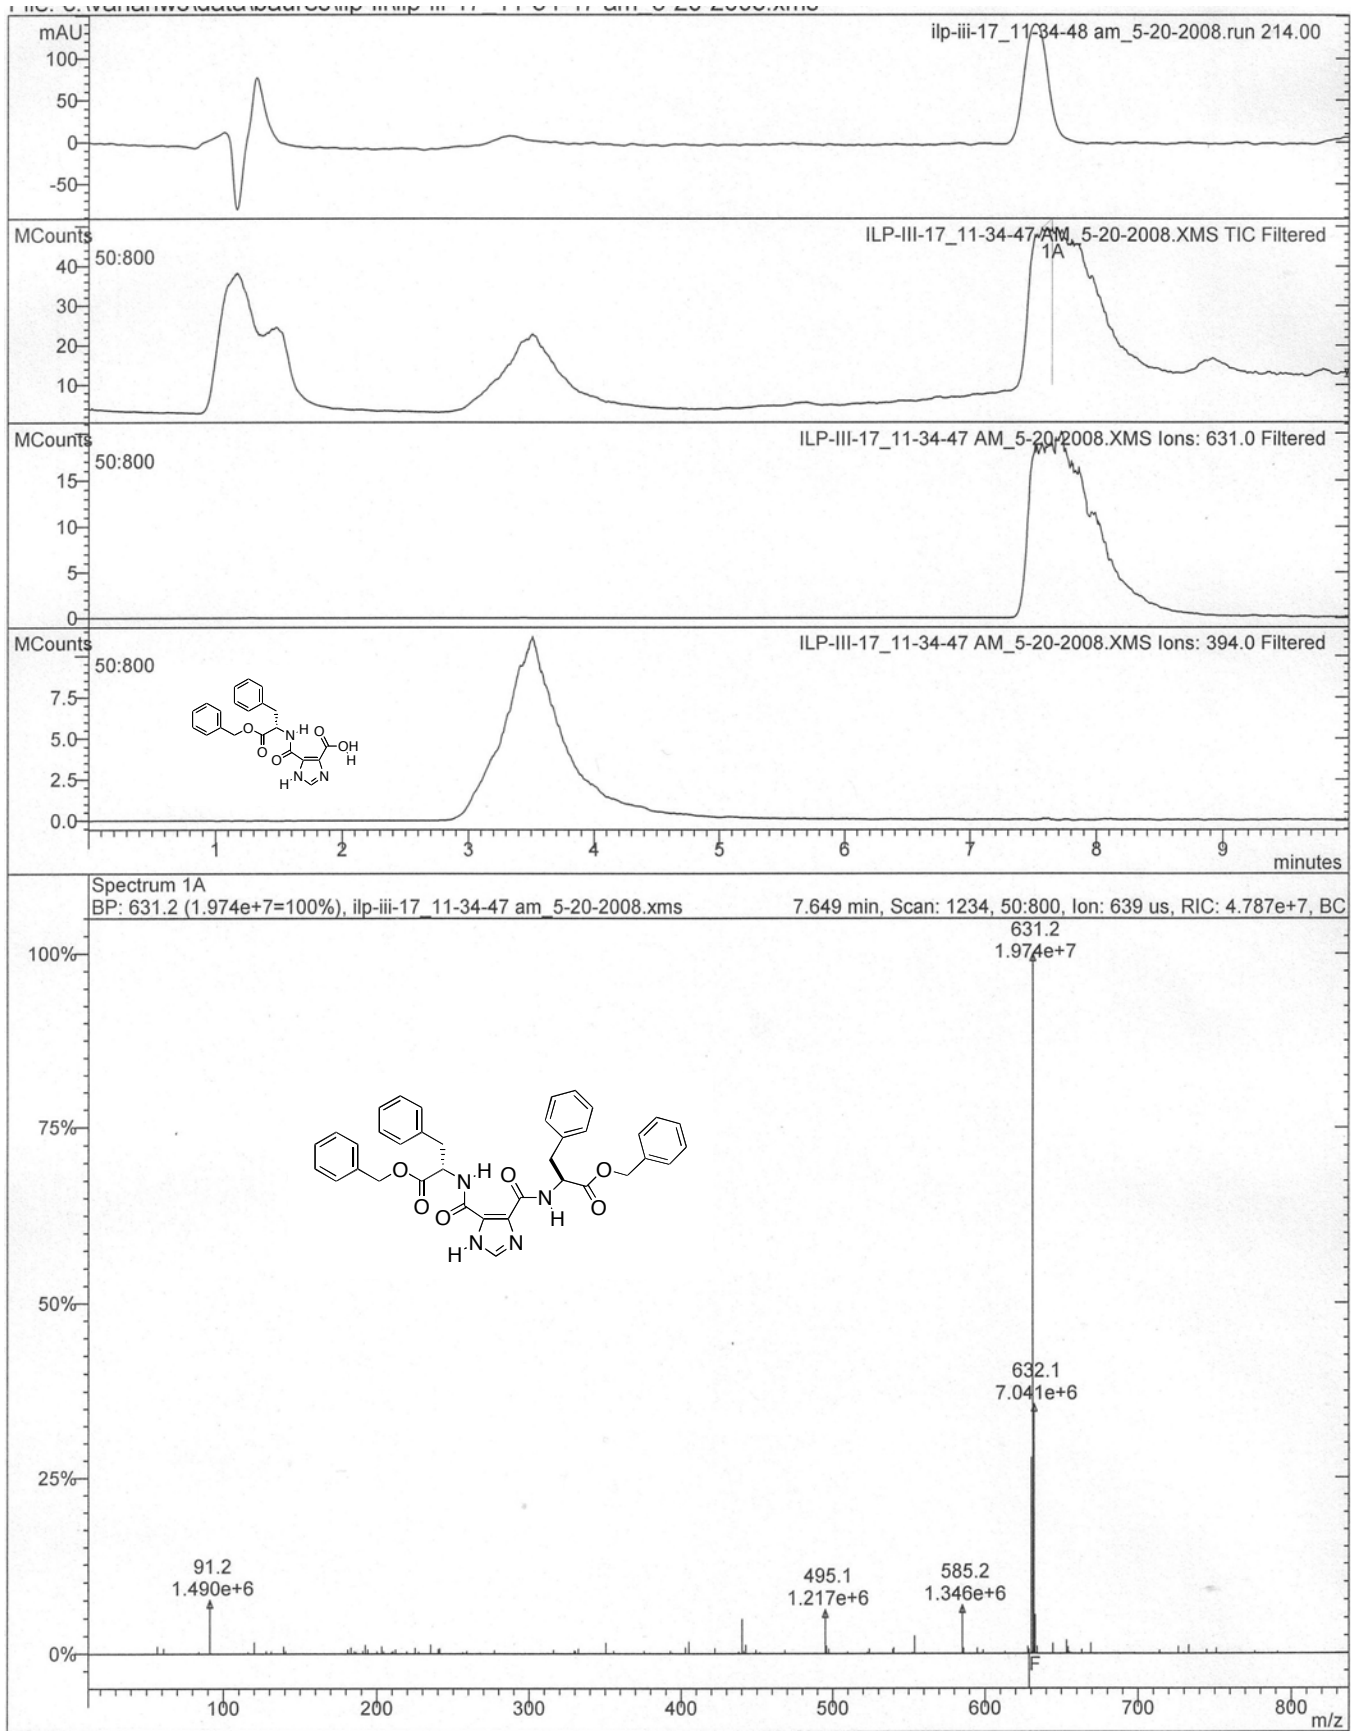

Figure S48. LC/MS data for the crude reaction to yield 4{8}.

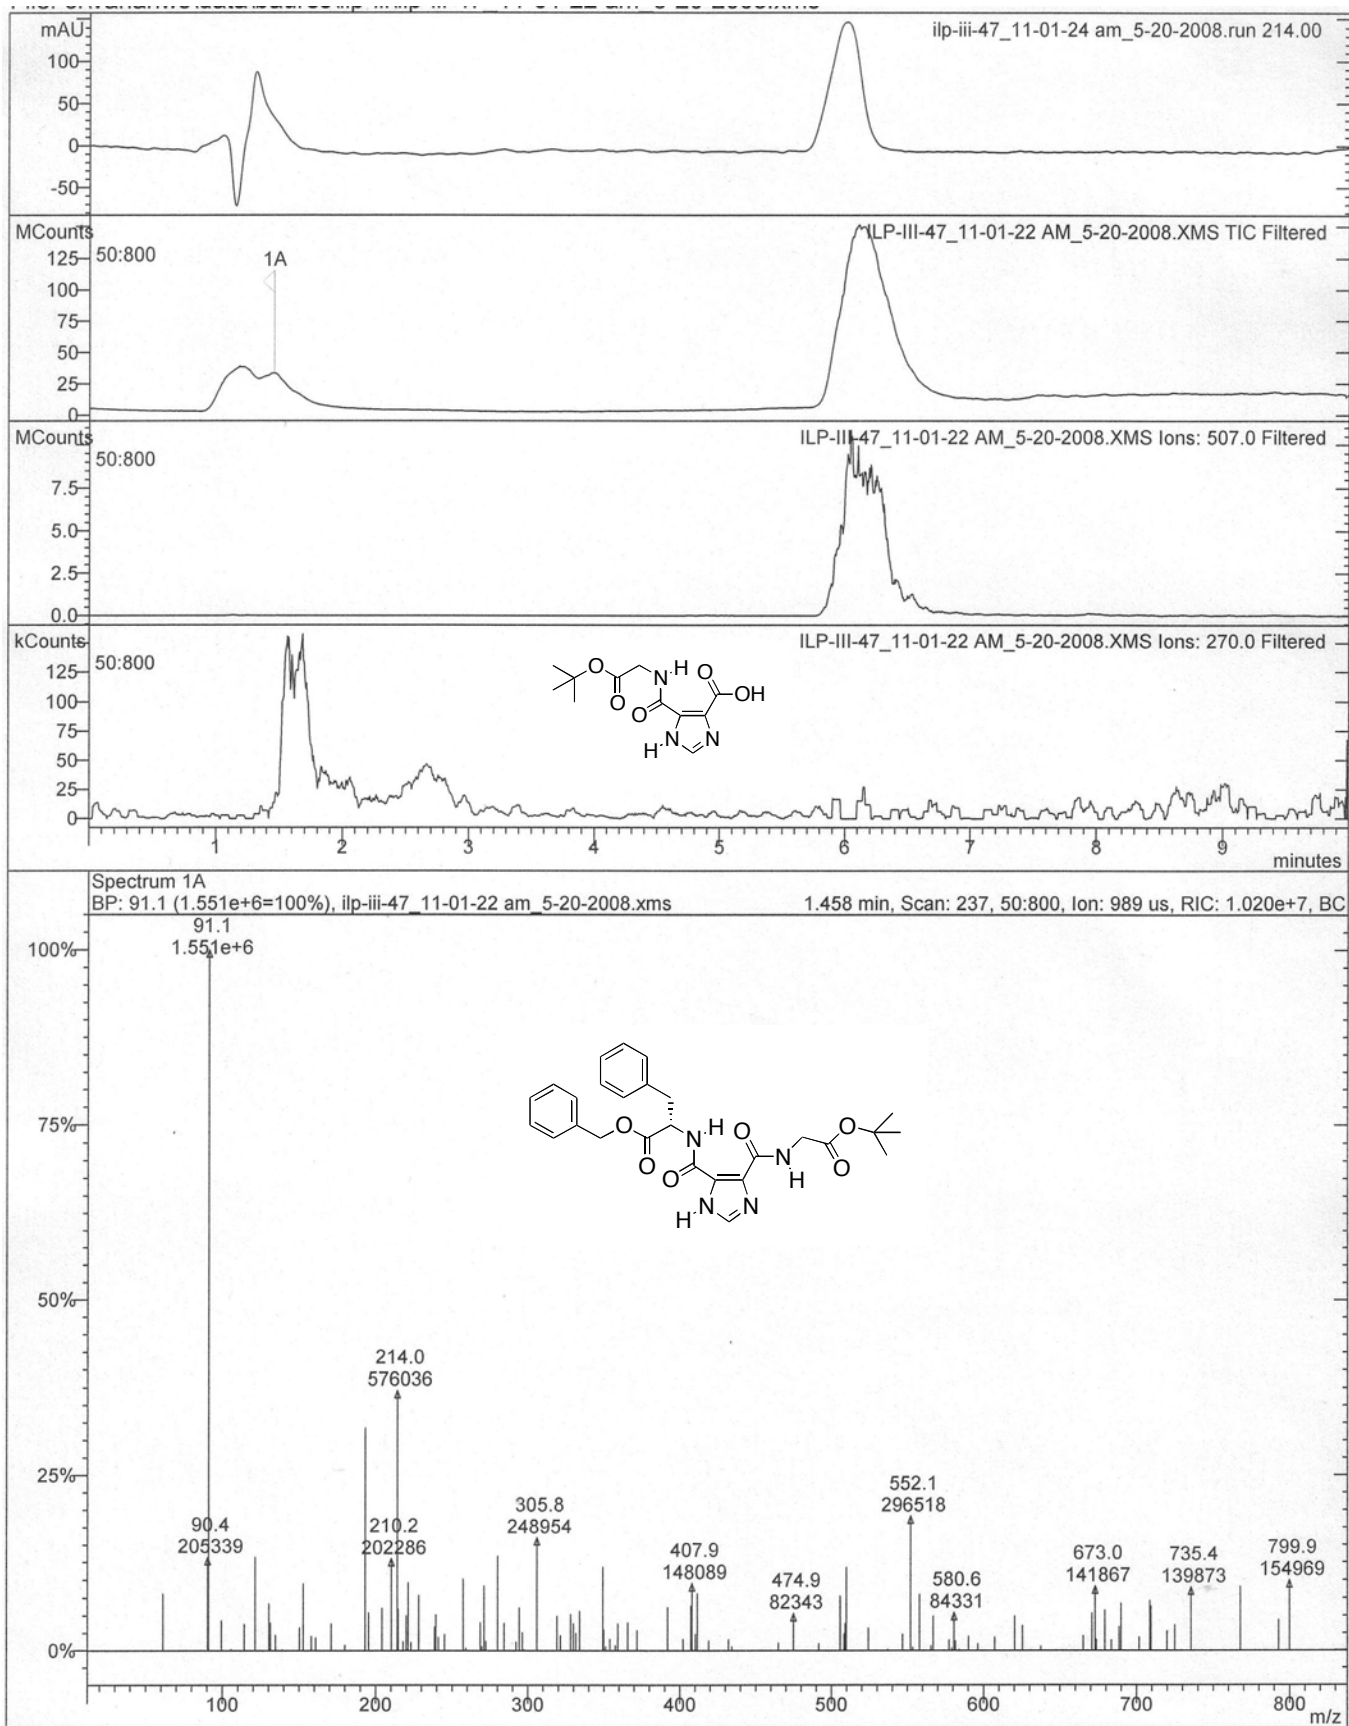

Figure S49. LC/MS data for the crude reaction to yield 4{16}.

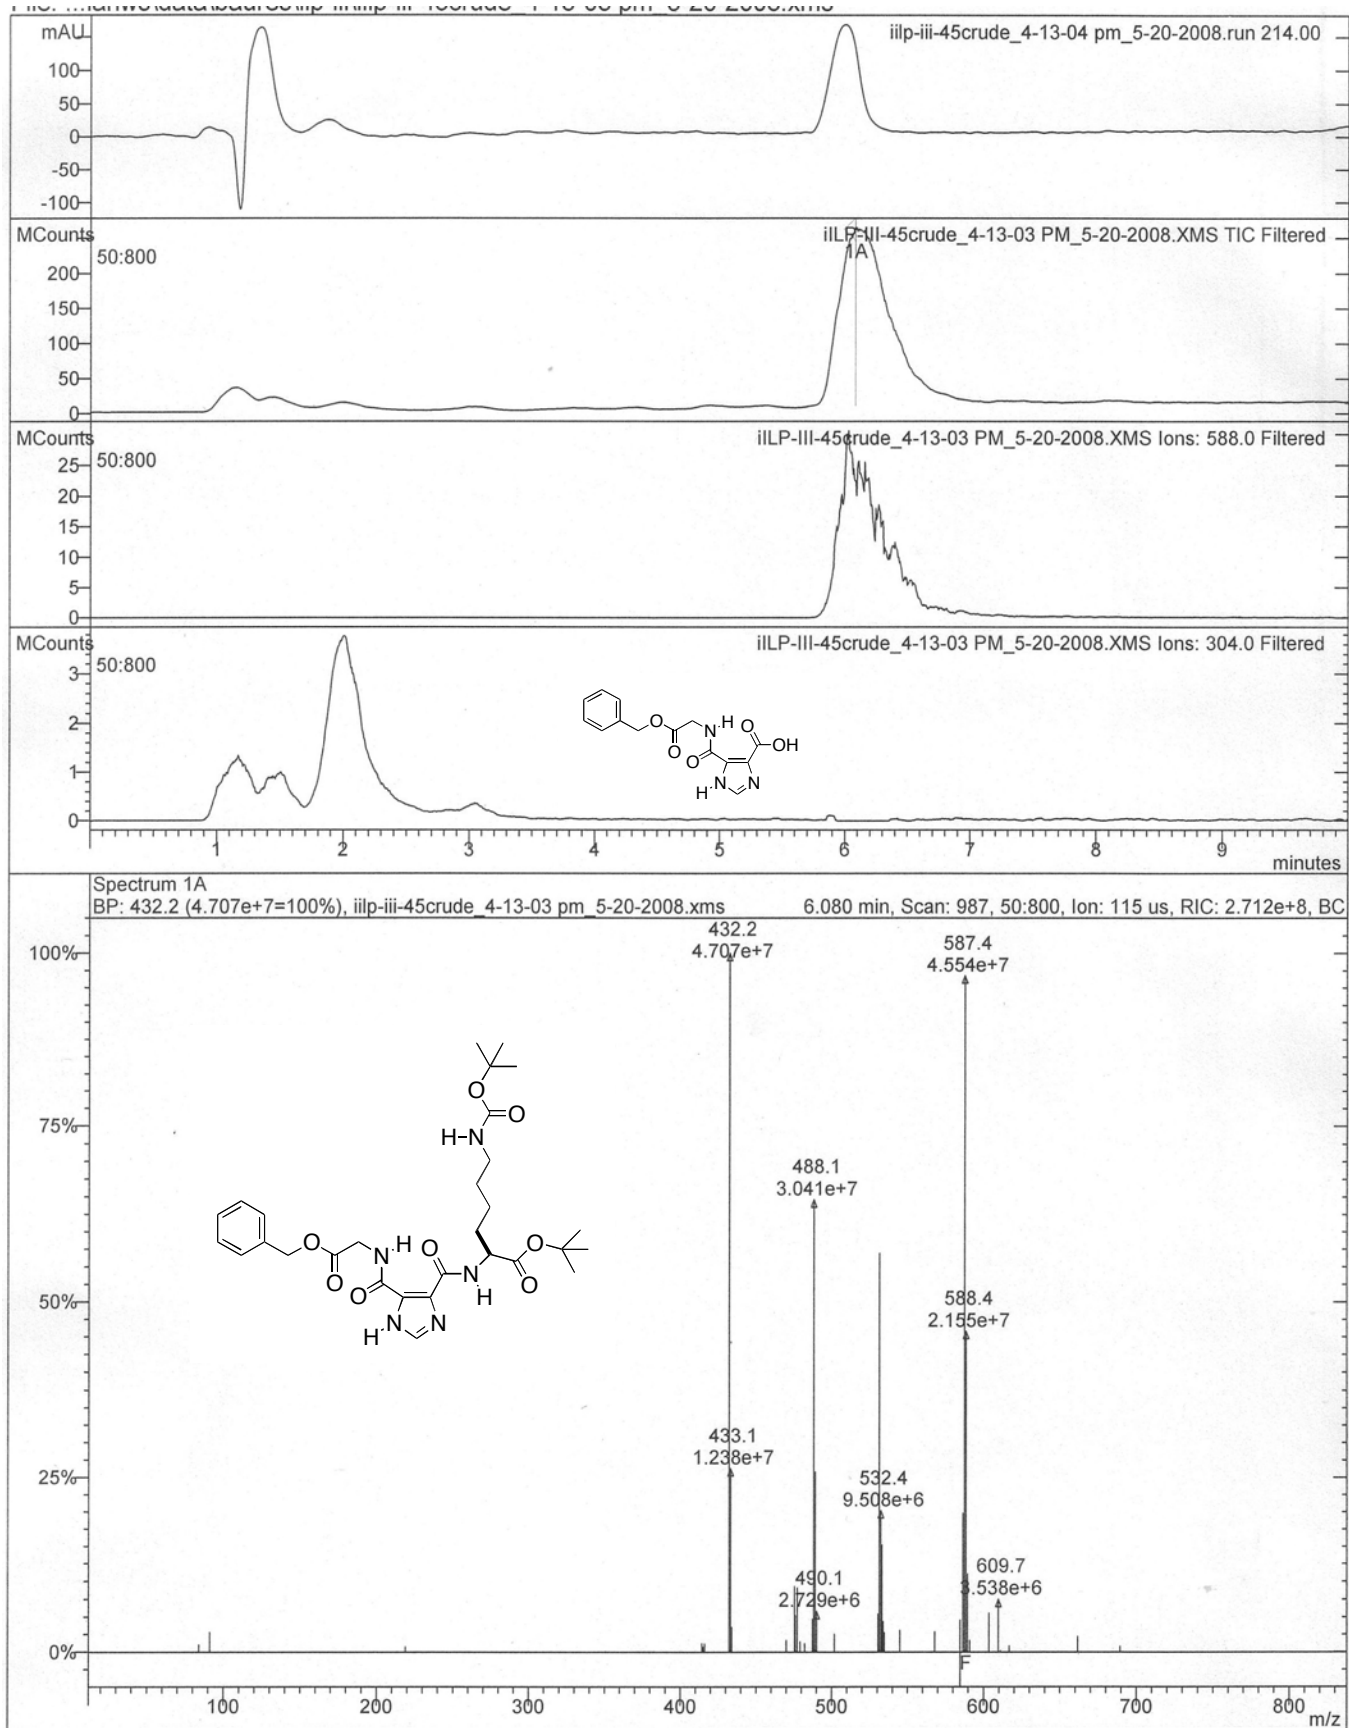

Figure S50. LC/MS data for the crude reaction to yield 4{24}.

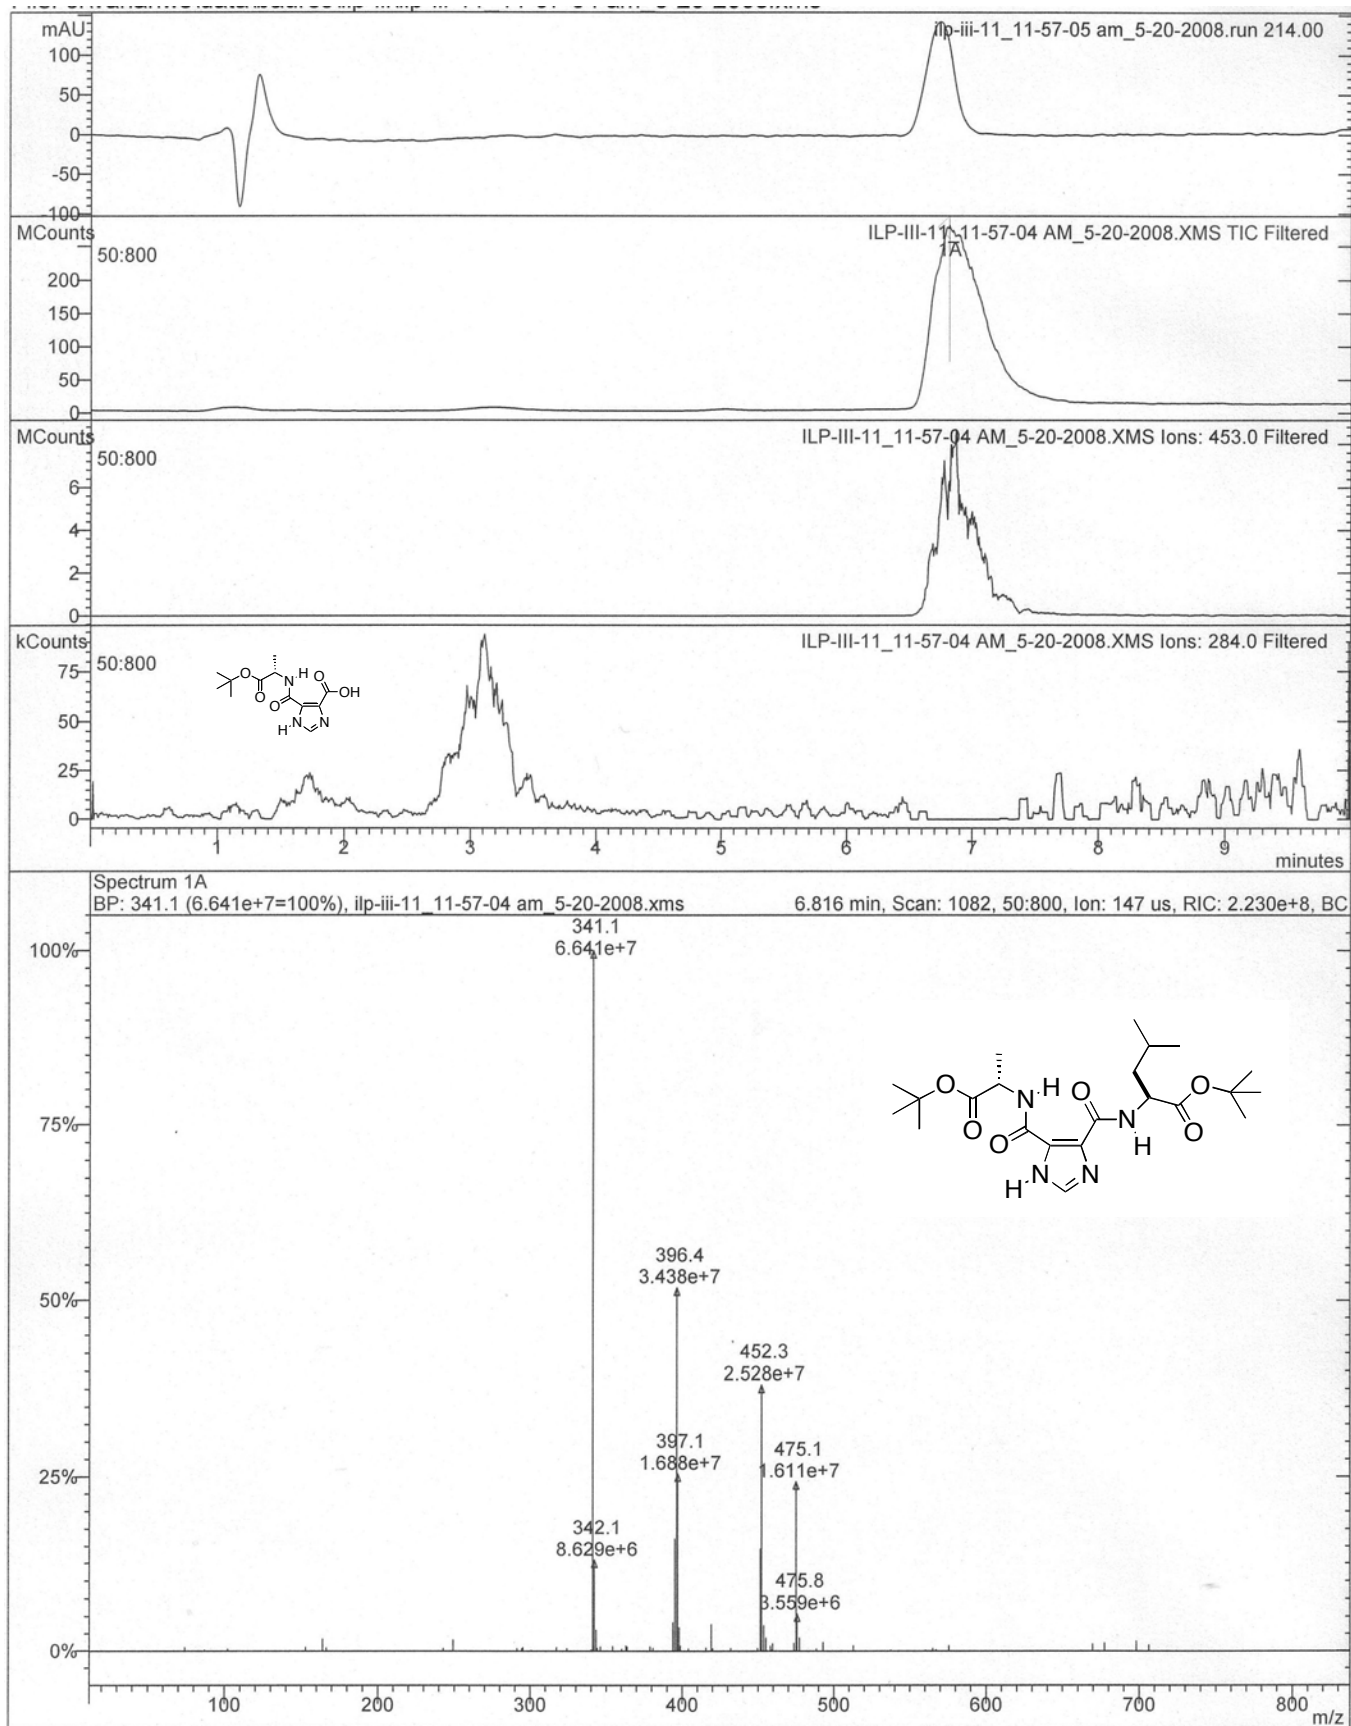

Figure S51. LC/MS data for the crude reaction to yield 4{26}.

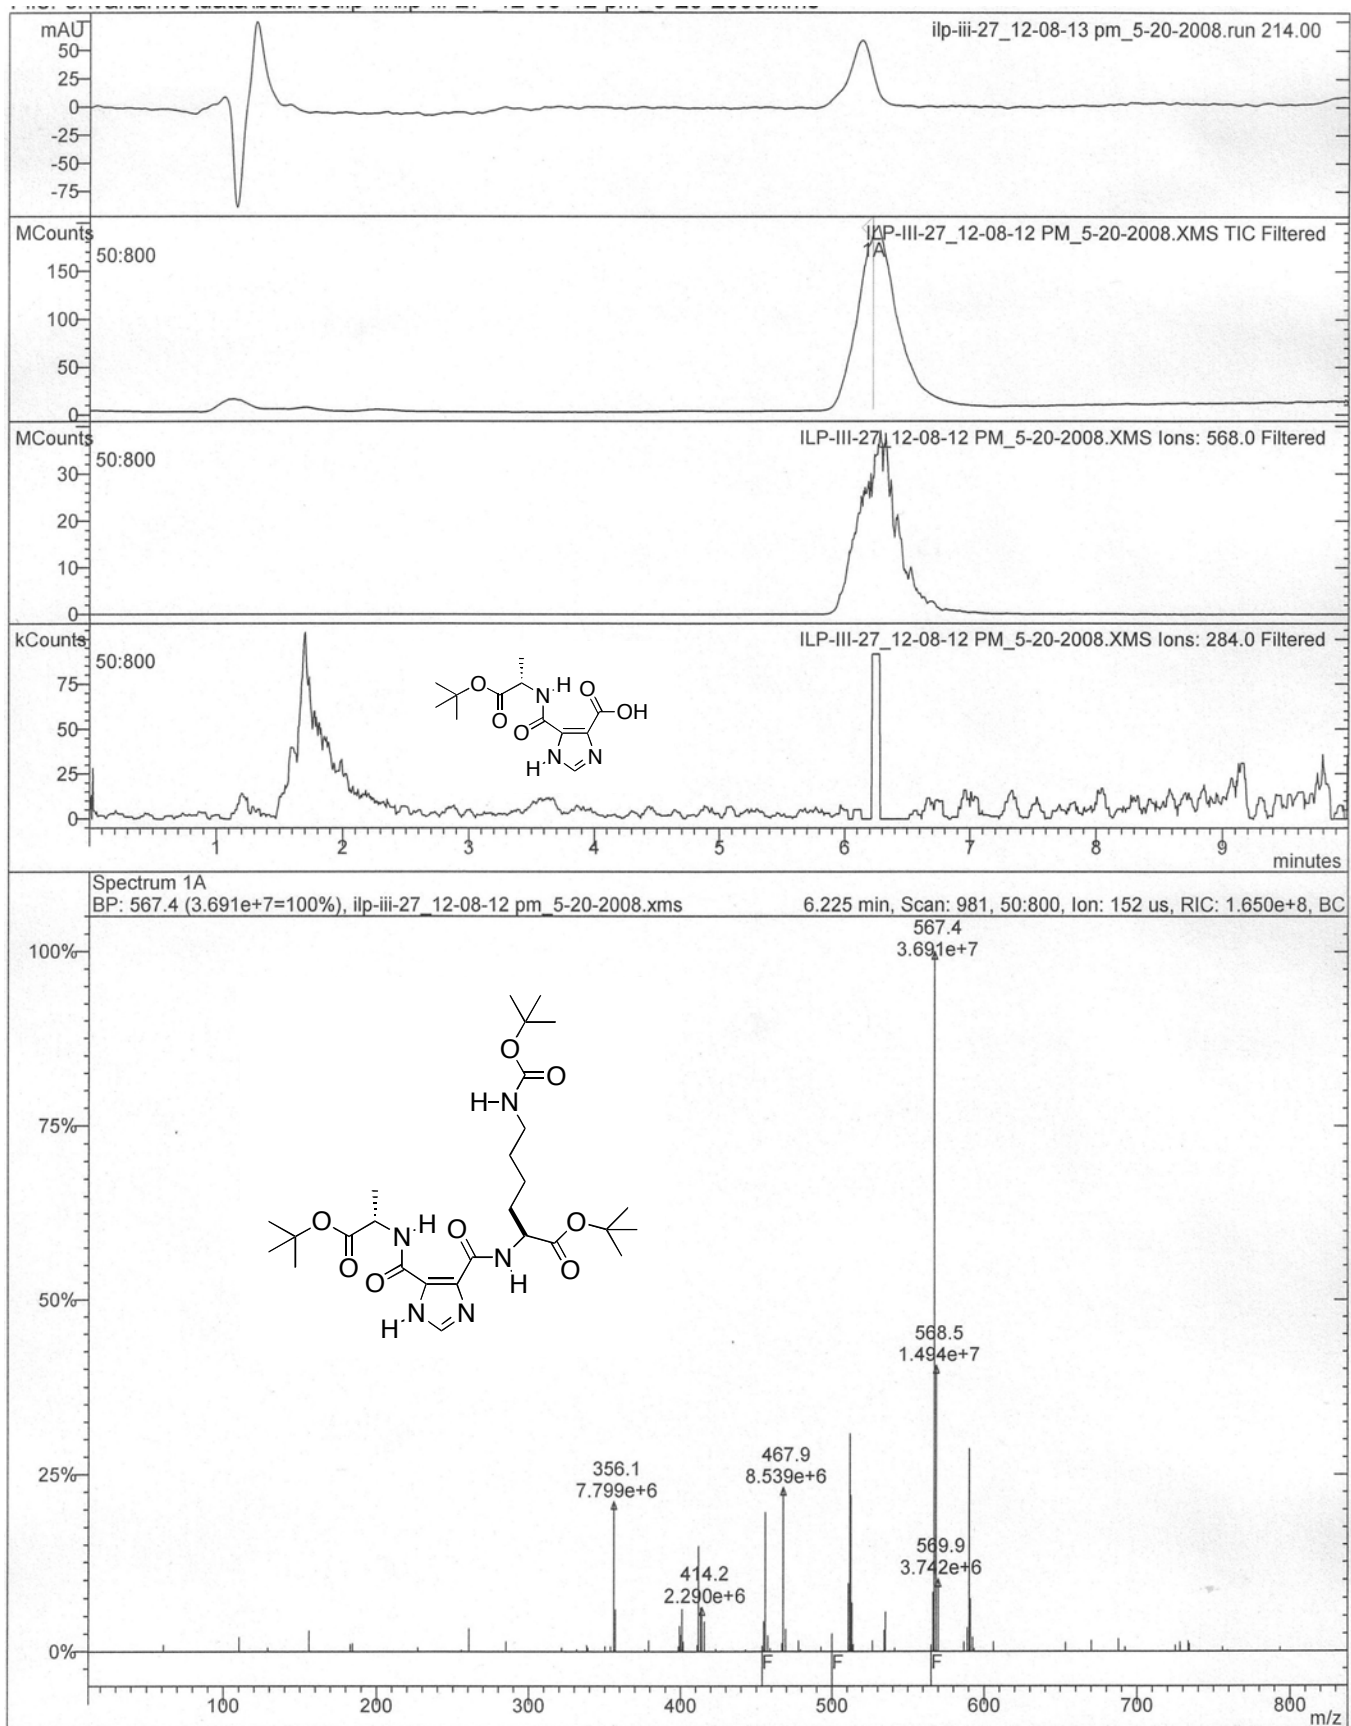

Figure S52. LC/MS data for the crude reaction to yield 4{30}.

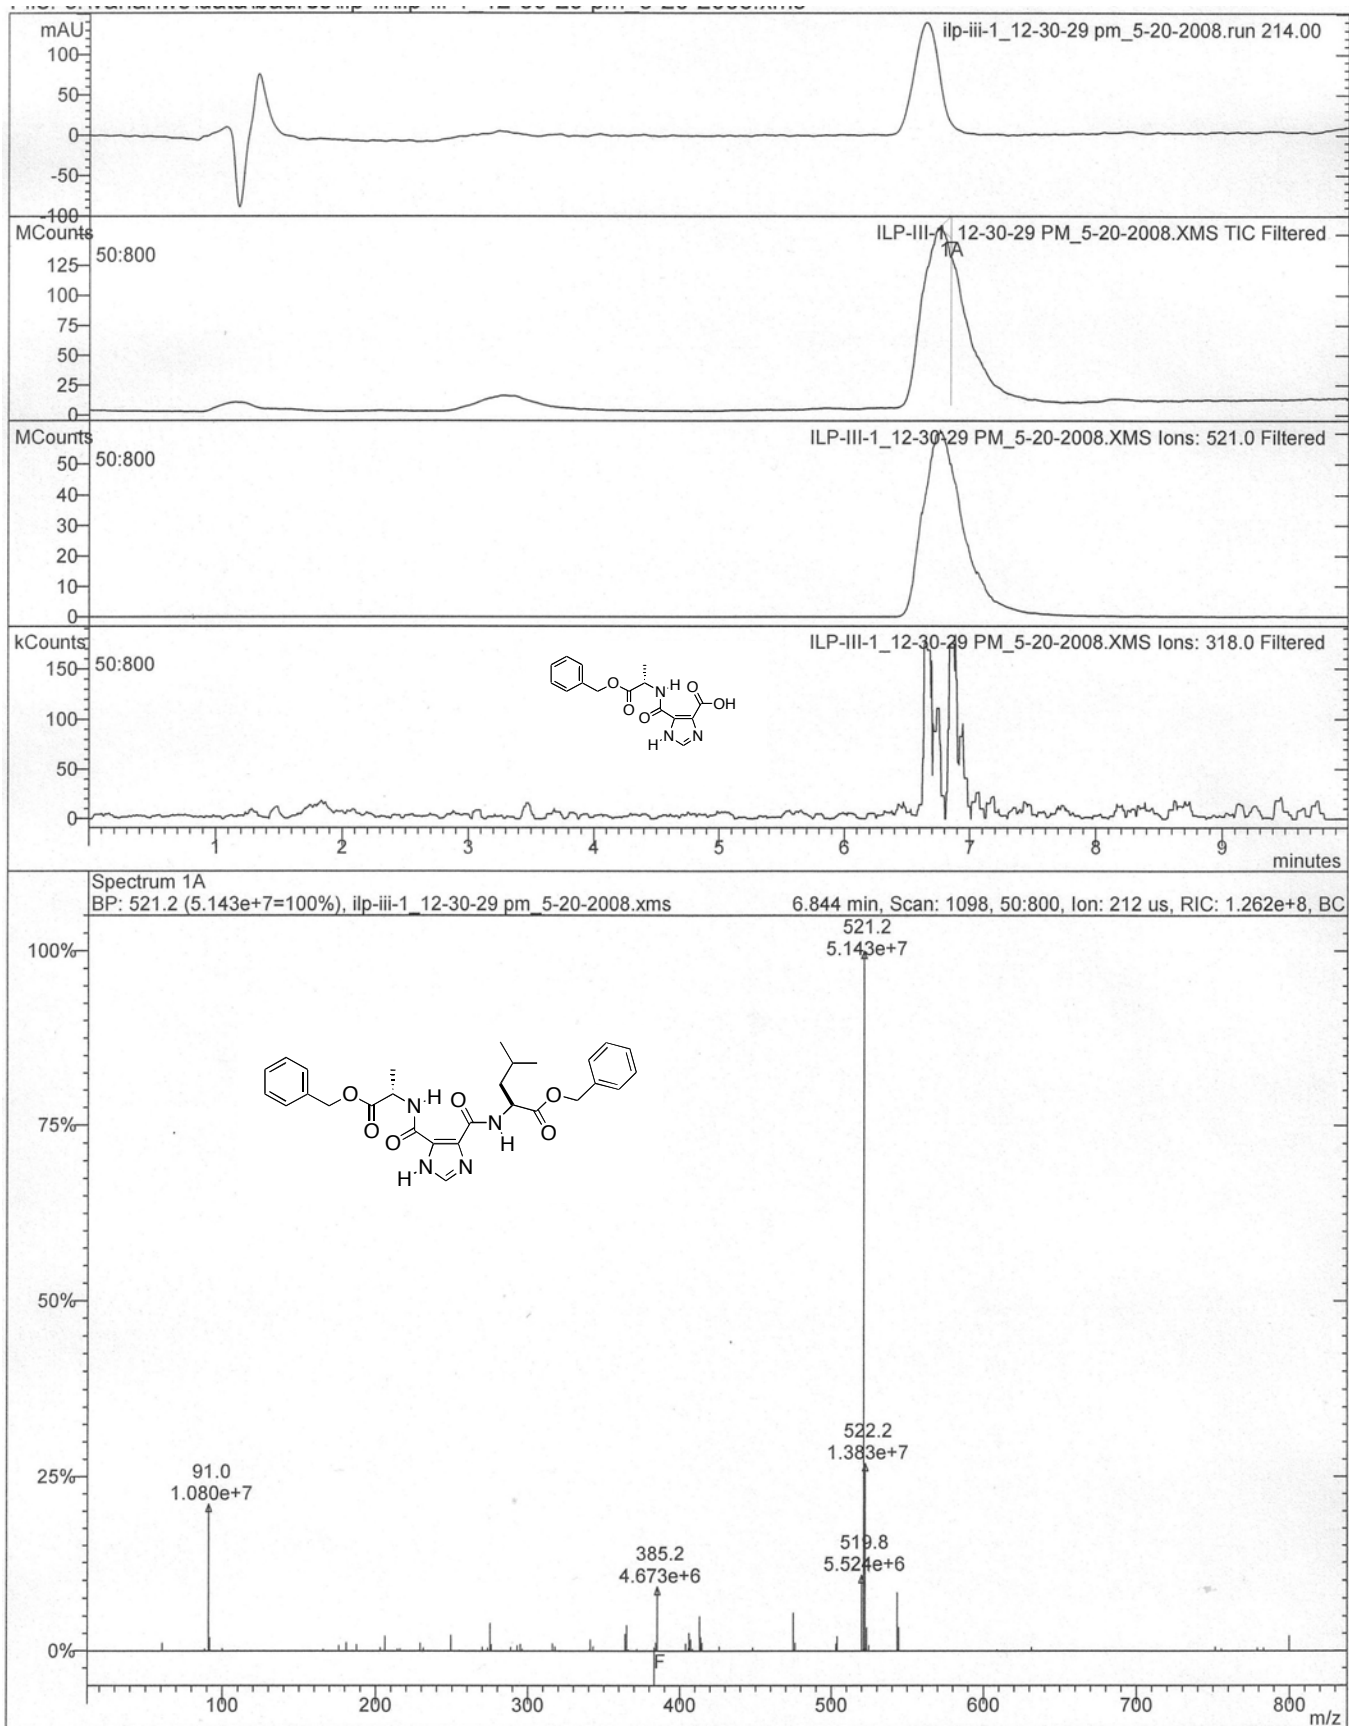

Figure S53. LC/MS data for the crude reaction to yield 4{32}.

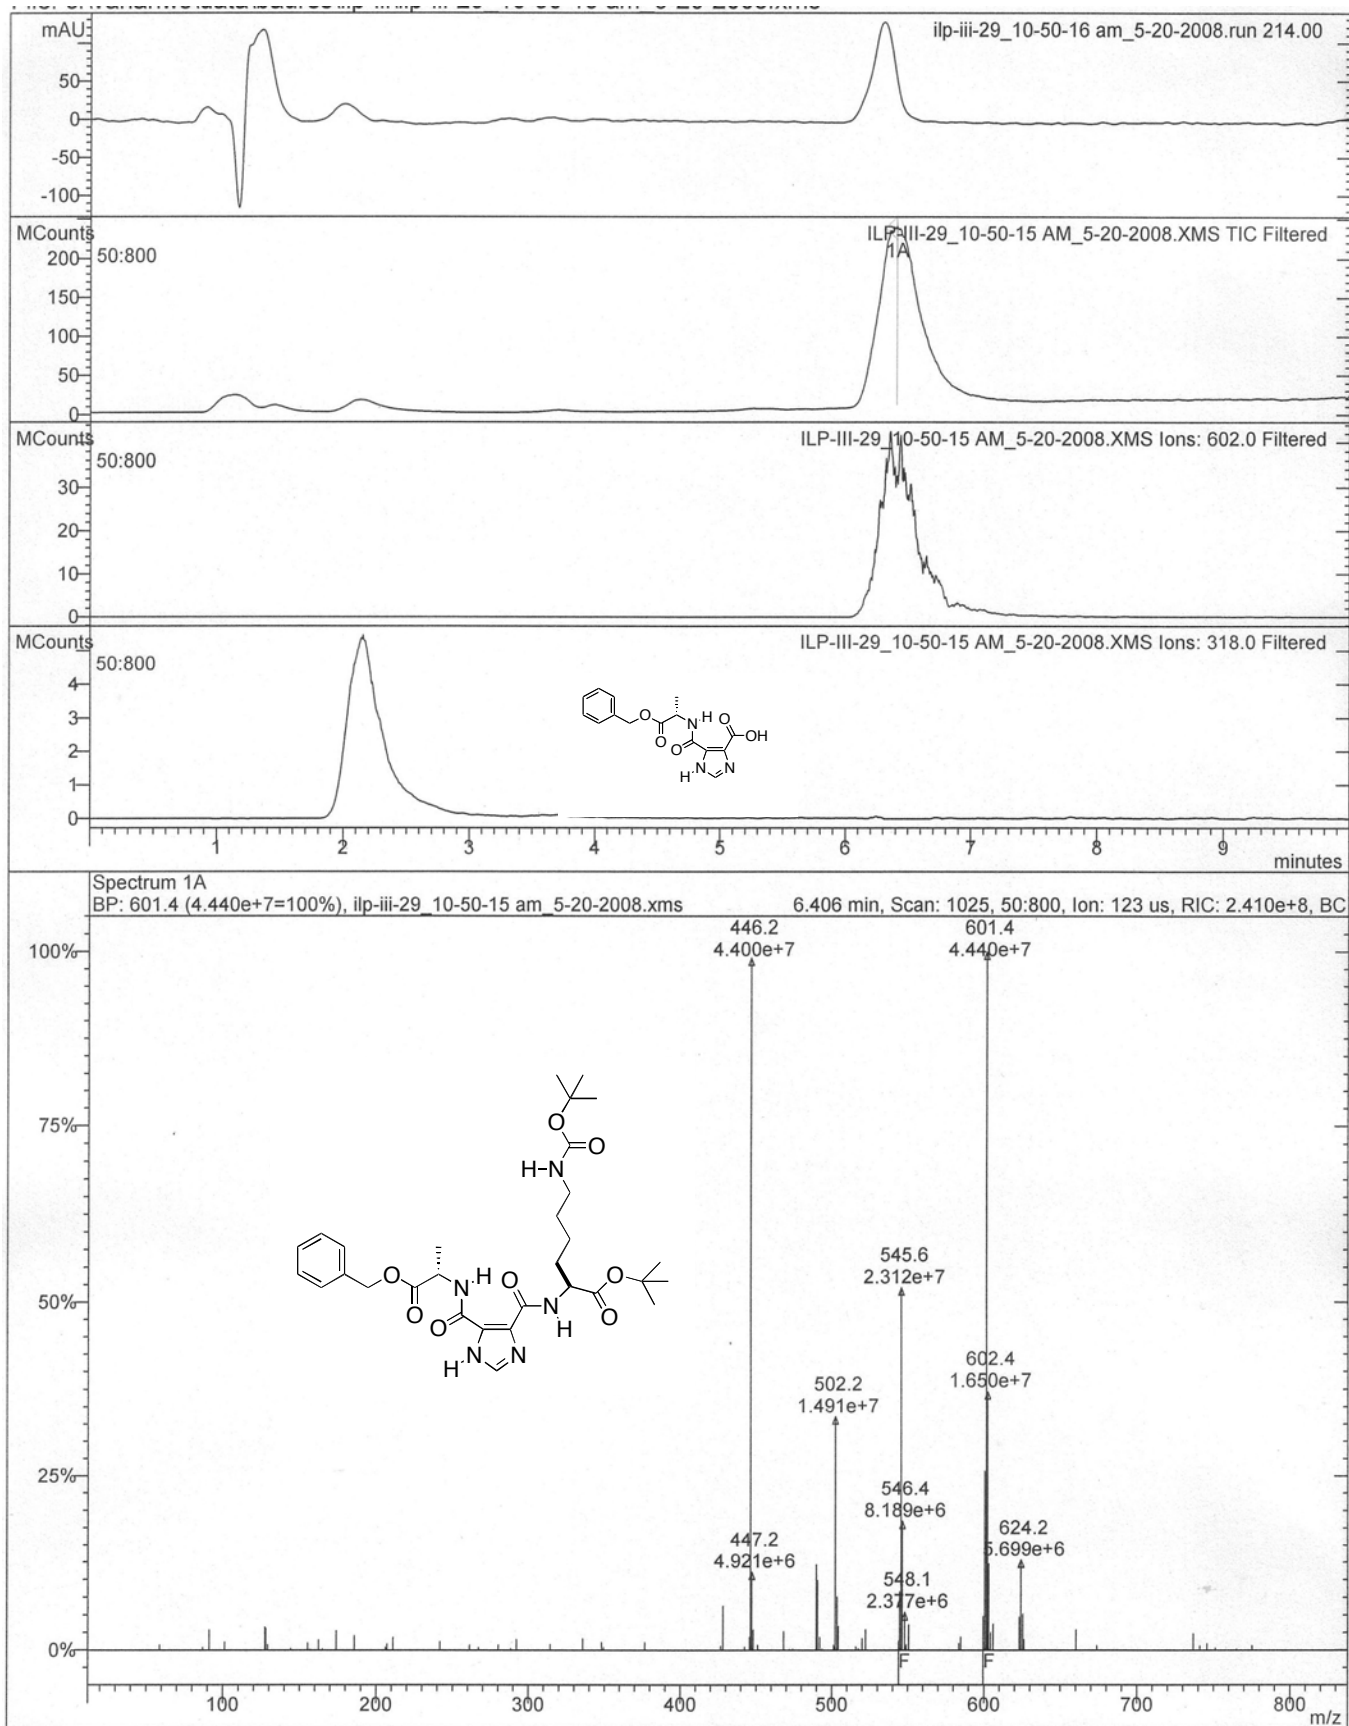

Figure S54. LC/MS data for the crude reaction to yield 4{35}.



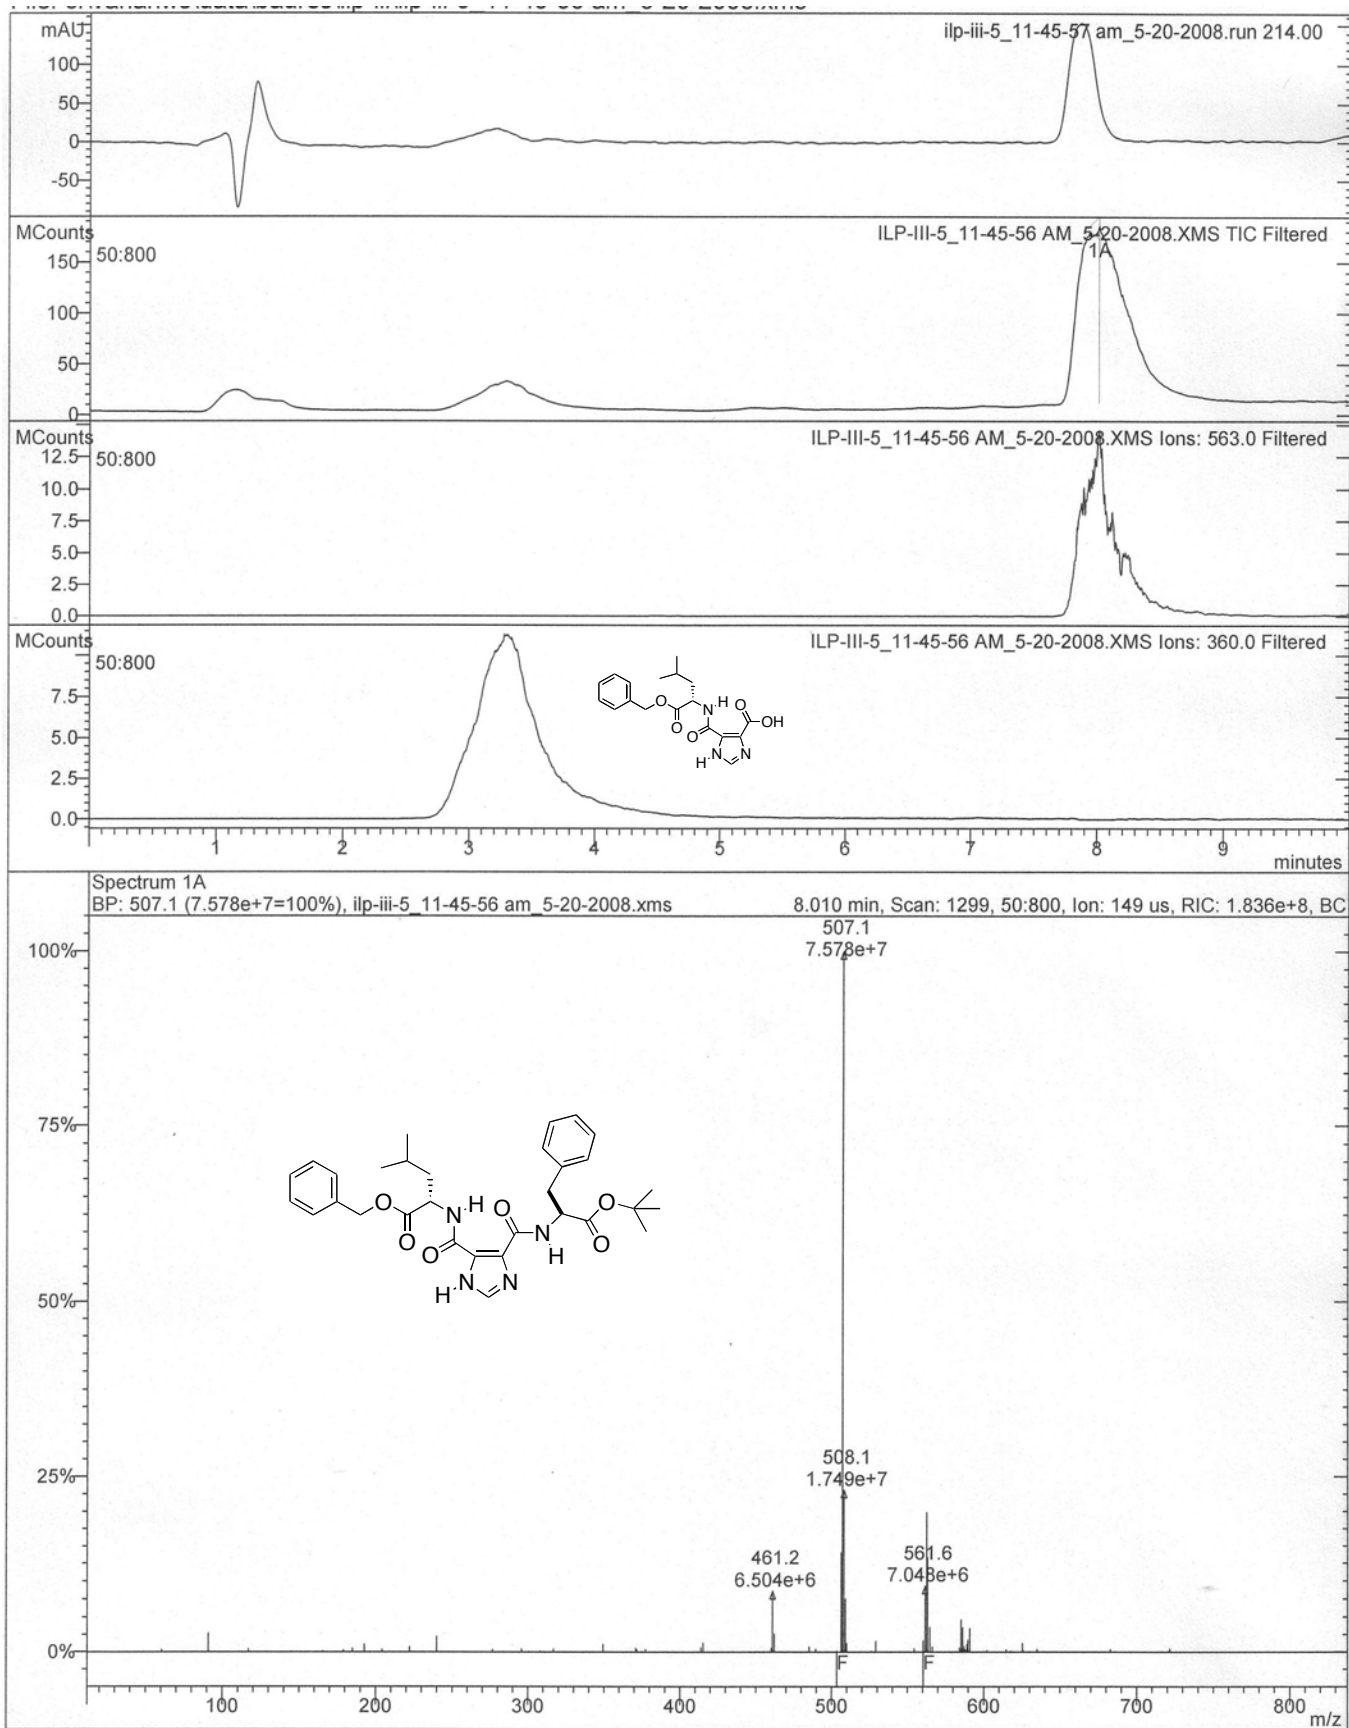

**Figure S55.** LC/MS data for the crude reaction to yield 4{40}.

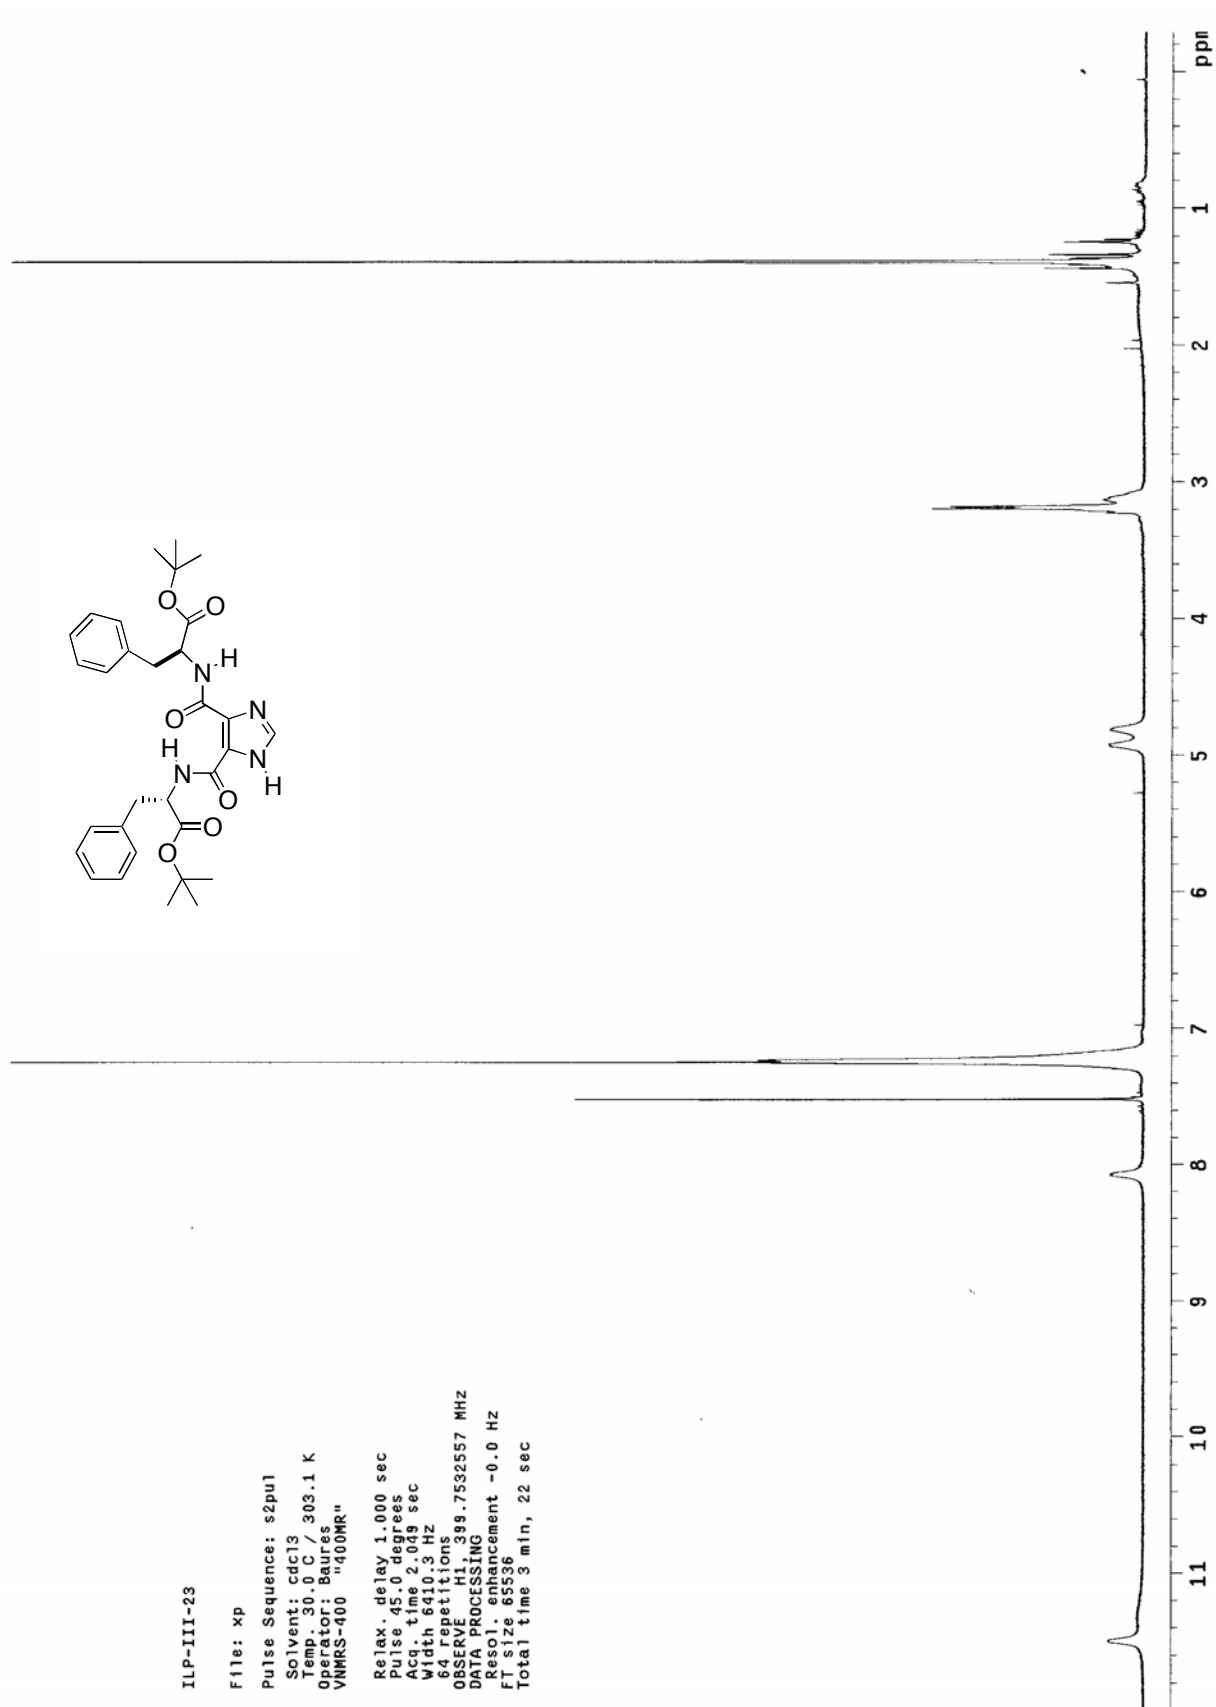

Figure S56. <sup>1</sup>H-NMR for 4{7}.

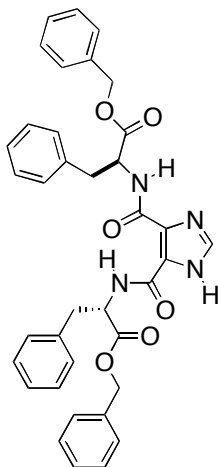

ILP-III-17

File: xp

Pulse Sequence: s2pu1

Solvent: cdcl3

Temp. 30.0 C / 303.1 K

Operator: Baures

VNMR5-400 "400MR"

Relax. delay 1.000 sec

Pulse 45.0 degrees

Acq. time 2.049 sec

Width 6410.3 Hz

64 repetitions

OBSERVE H1, 399.7532555 MHz

DATA PROCESSING

Resol. enhancement -0.0 Hz

FT size 65536

Total time 3 min, 22 sec

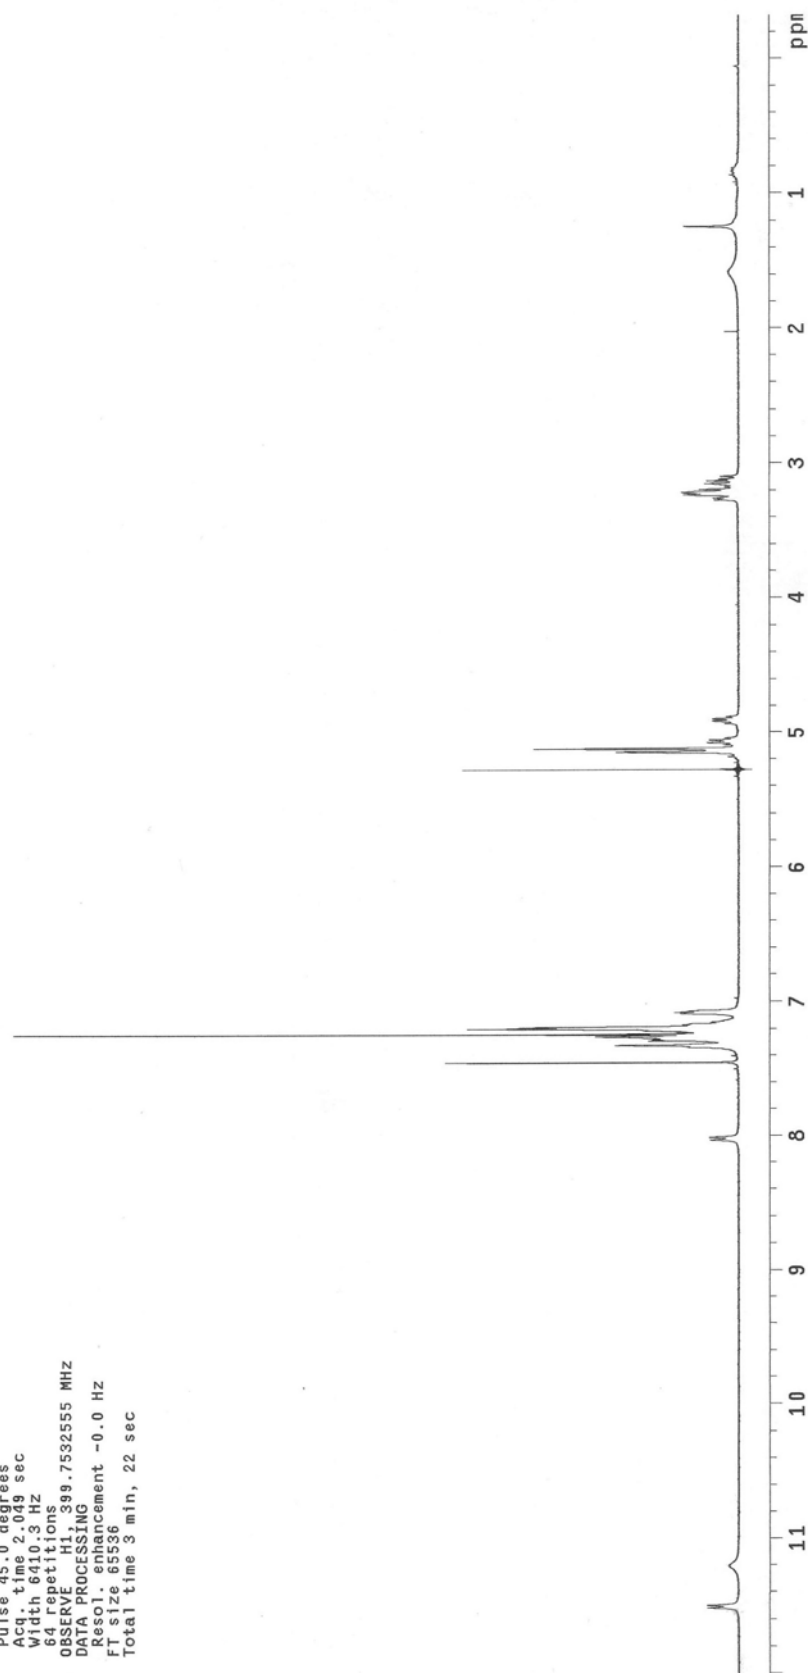

Figure S57. <sup>1</sup>H-NMR for 4{8}.

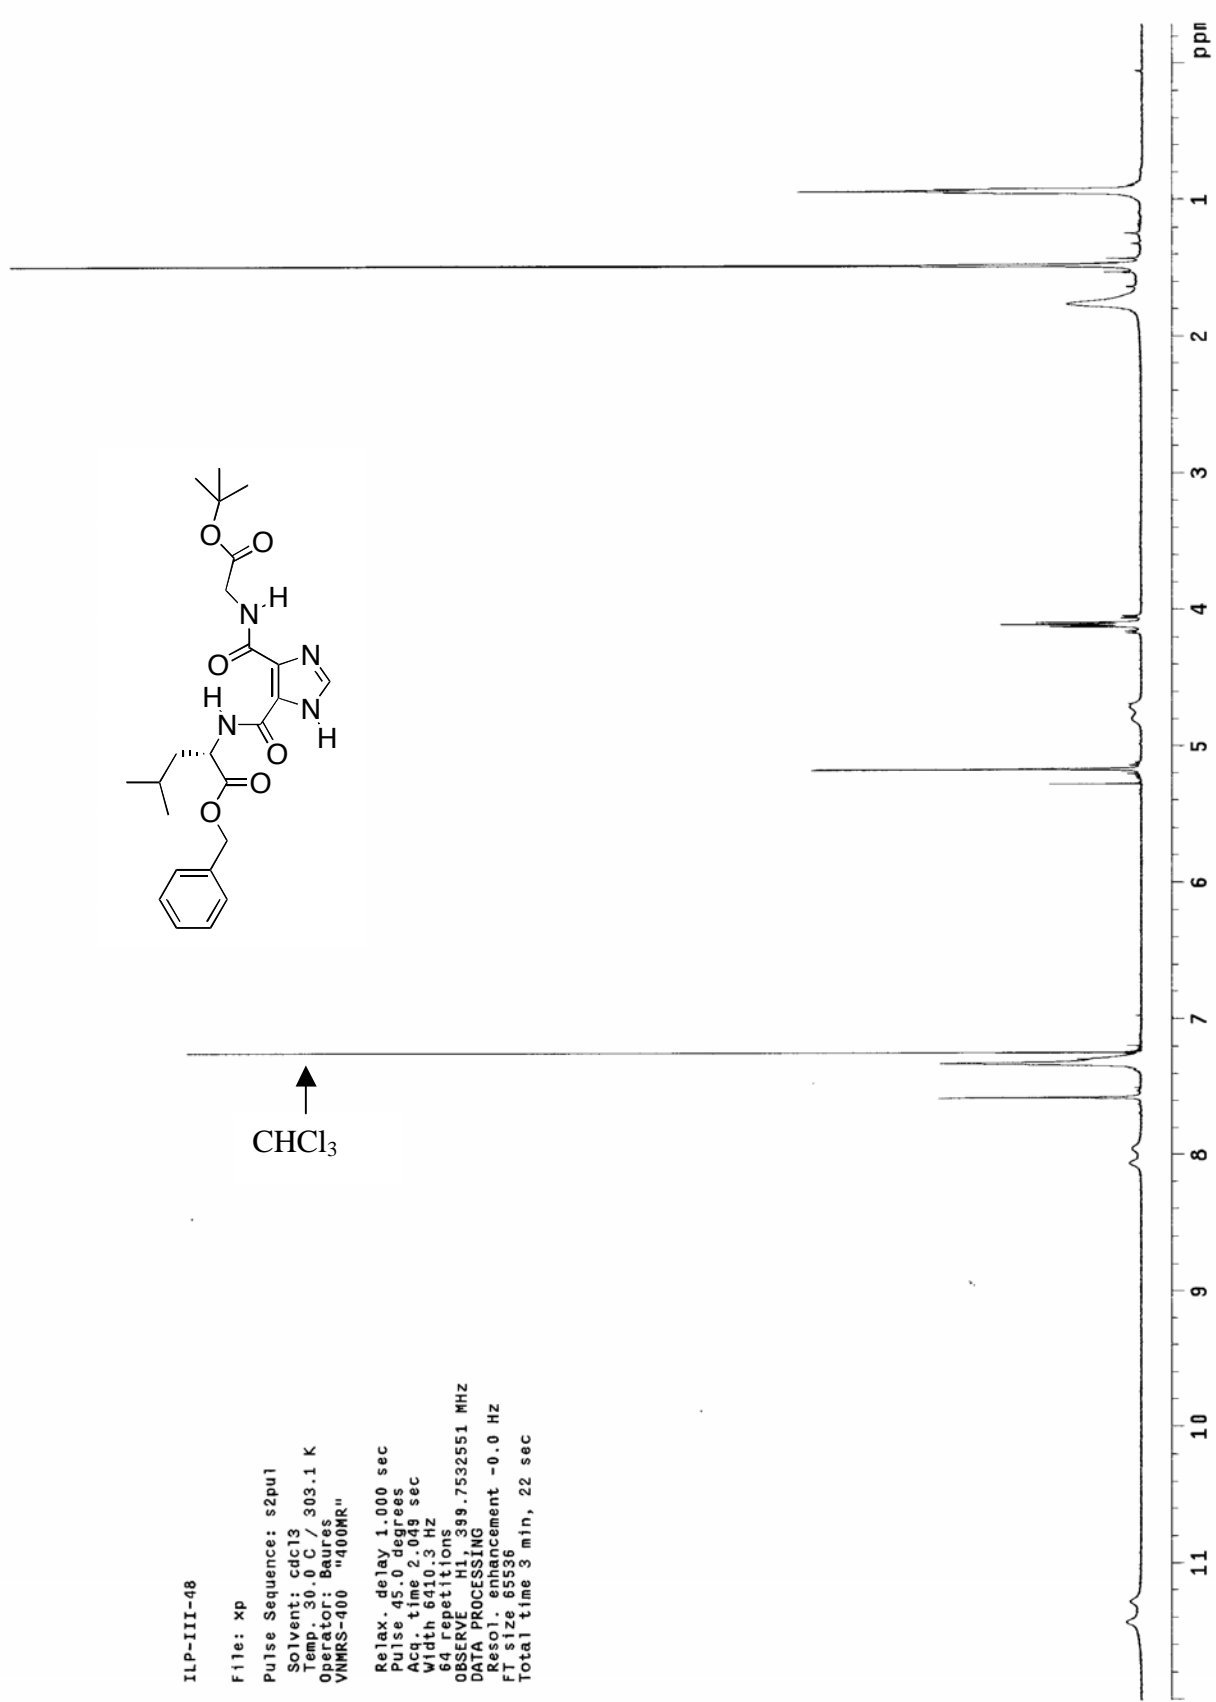

Figure S58. <sup>1</sup>H-NMR for 4{14}.

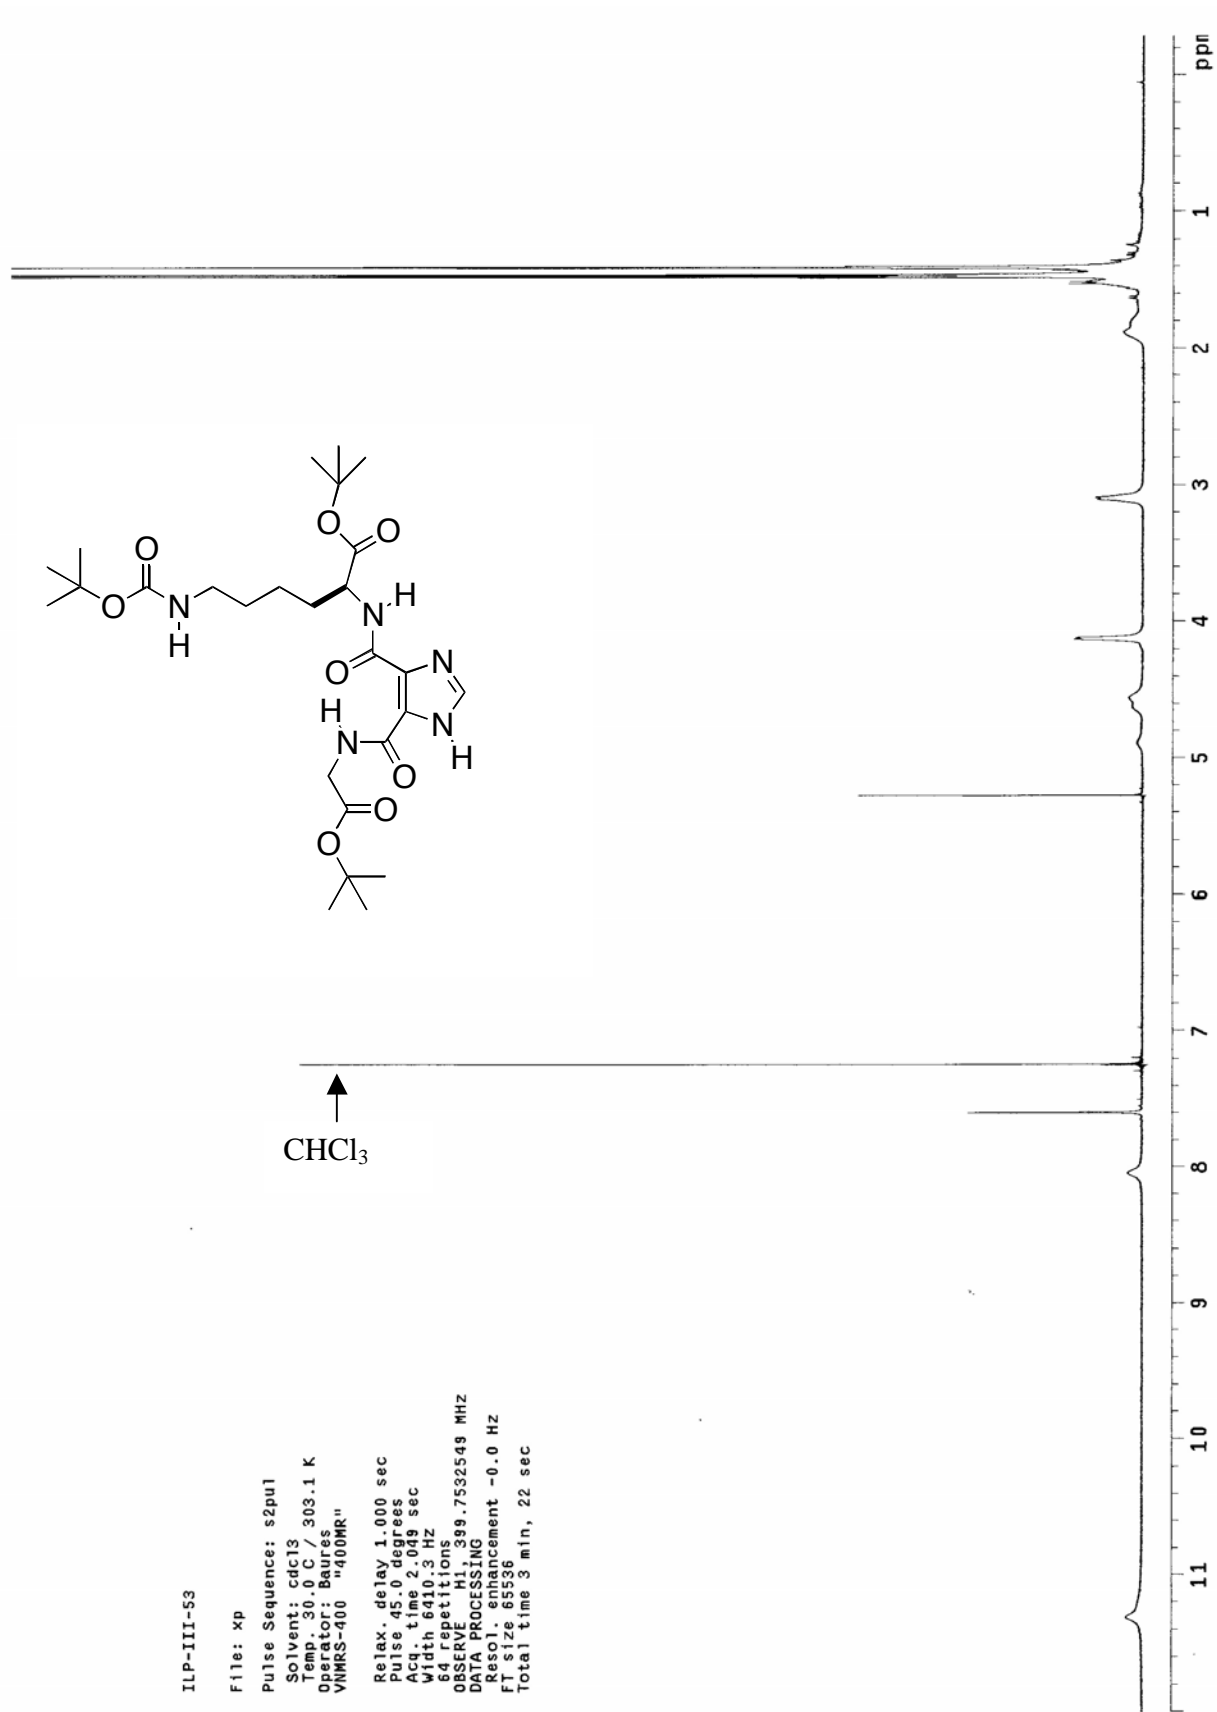

Figure 59. <sup>1</sup>H-NMR for 4{17}.

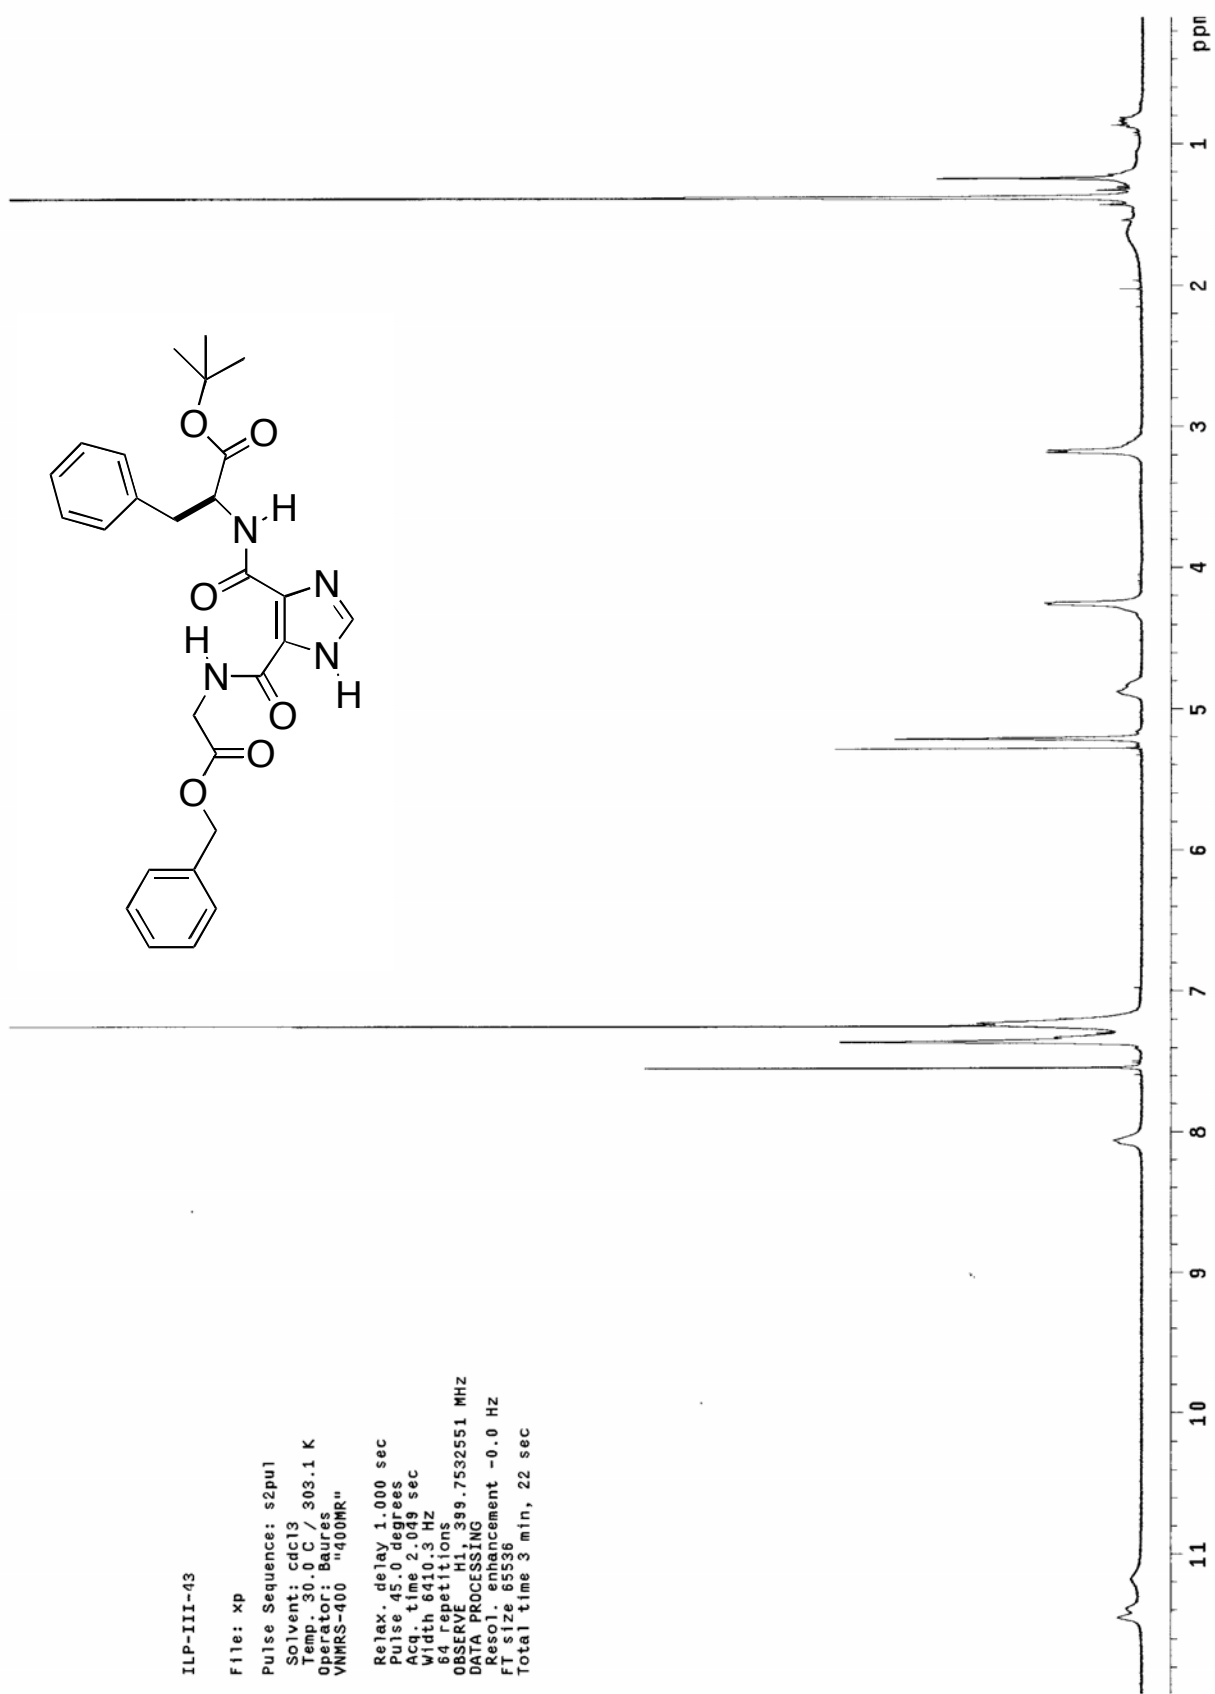

Figure S60.  $^1\text{H-NMR}$  for 4{22}.

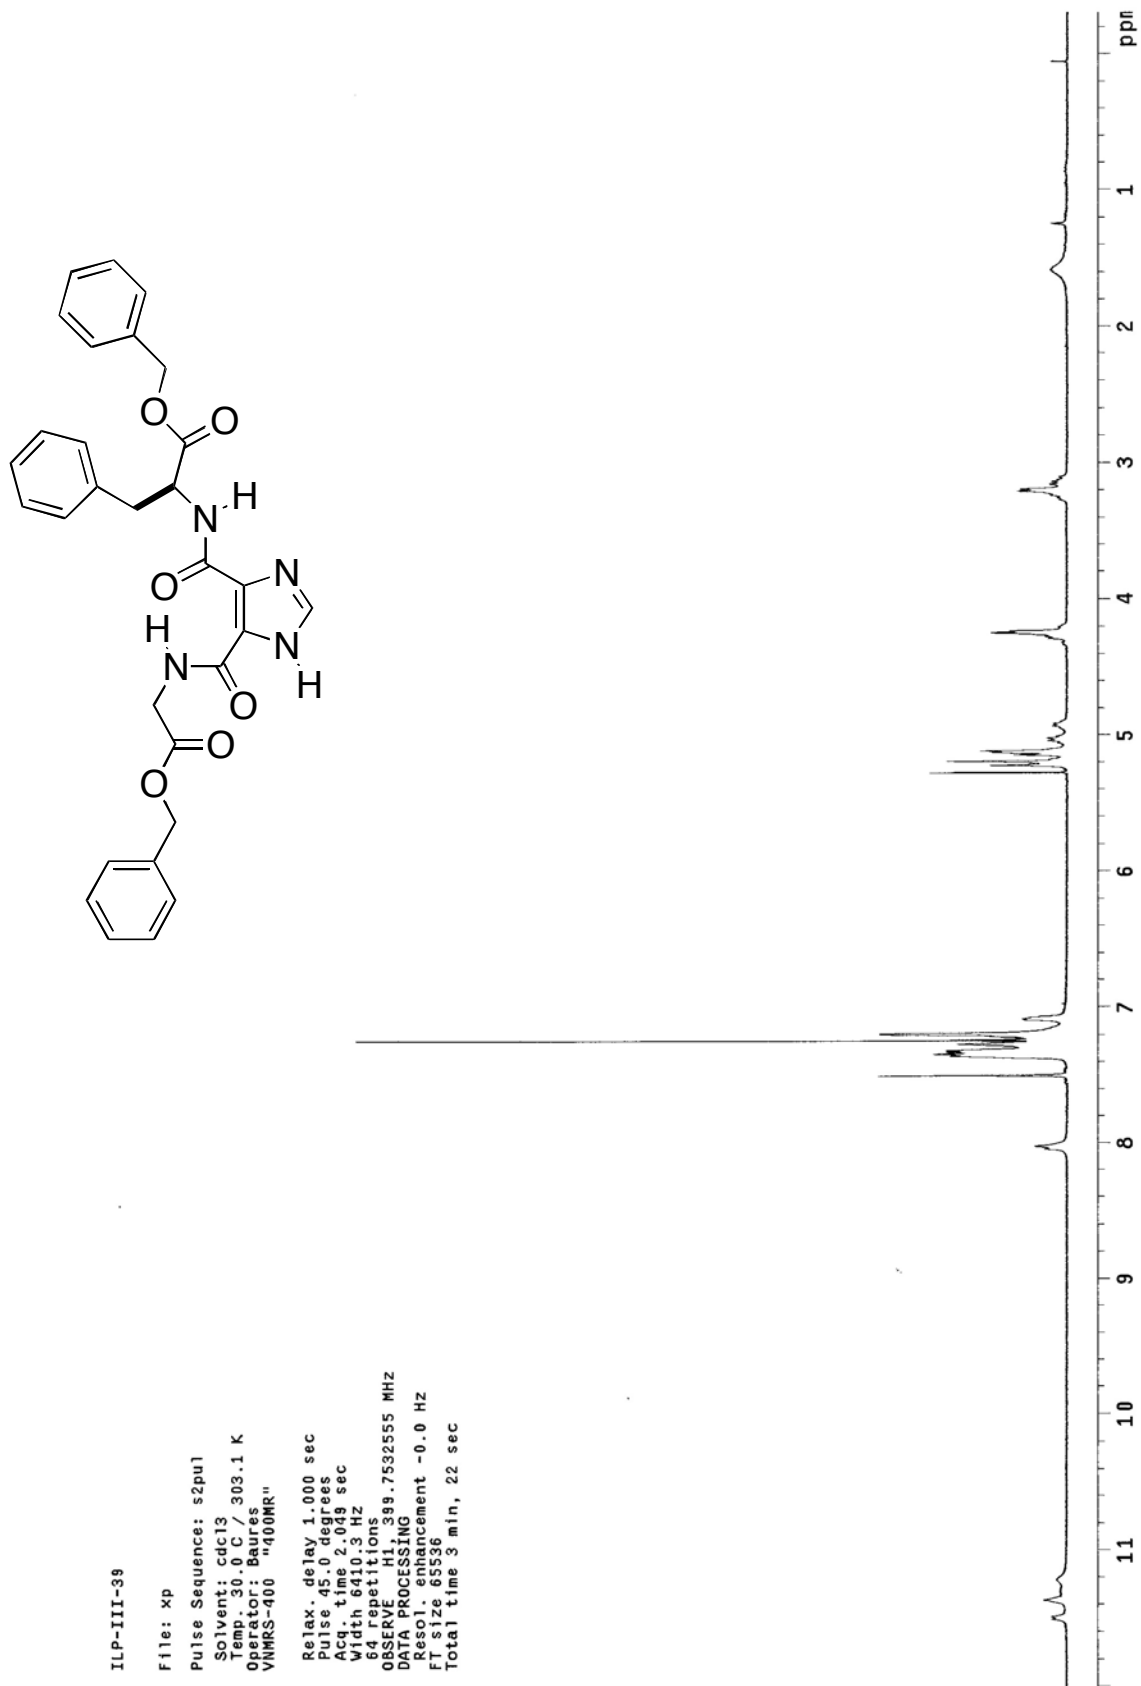

Figure S61.  $^1\text{H-NMR}$  for 4{23}.

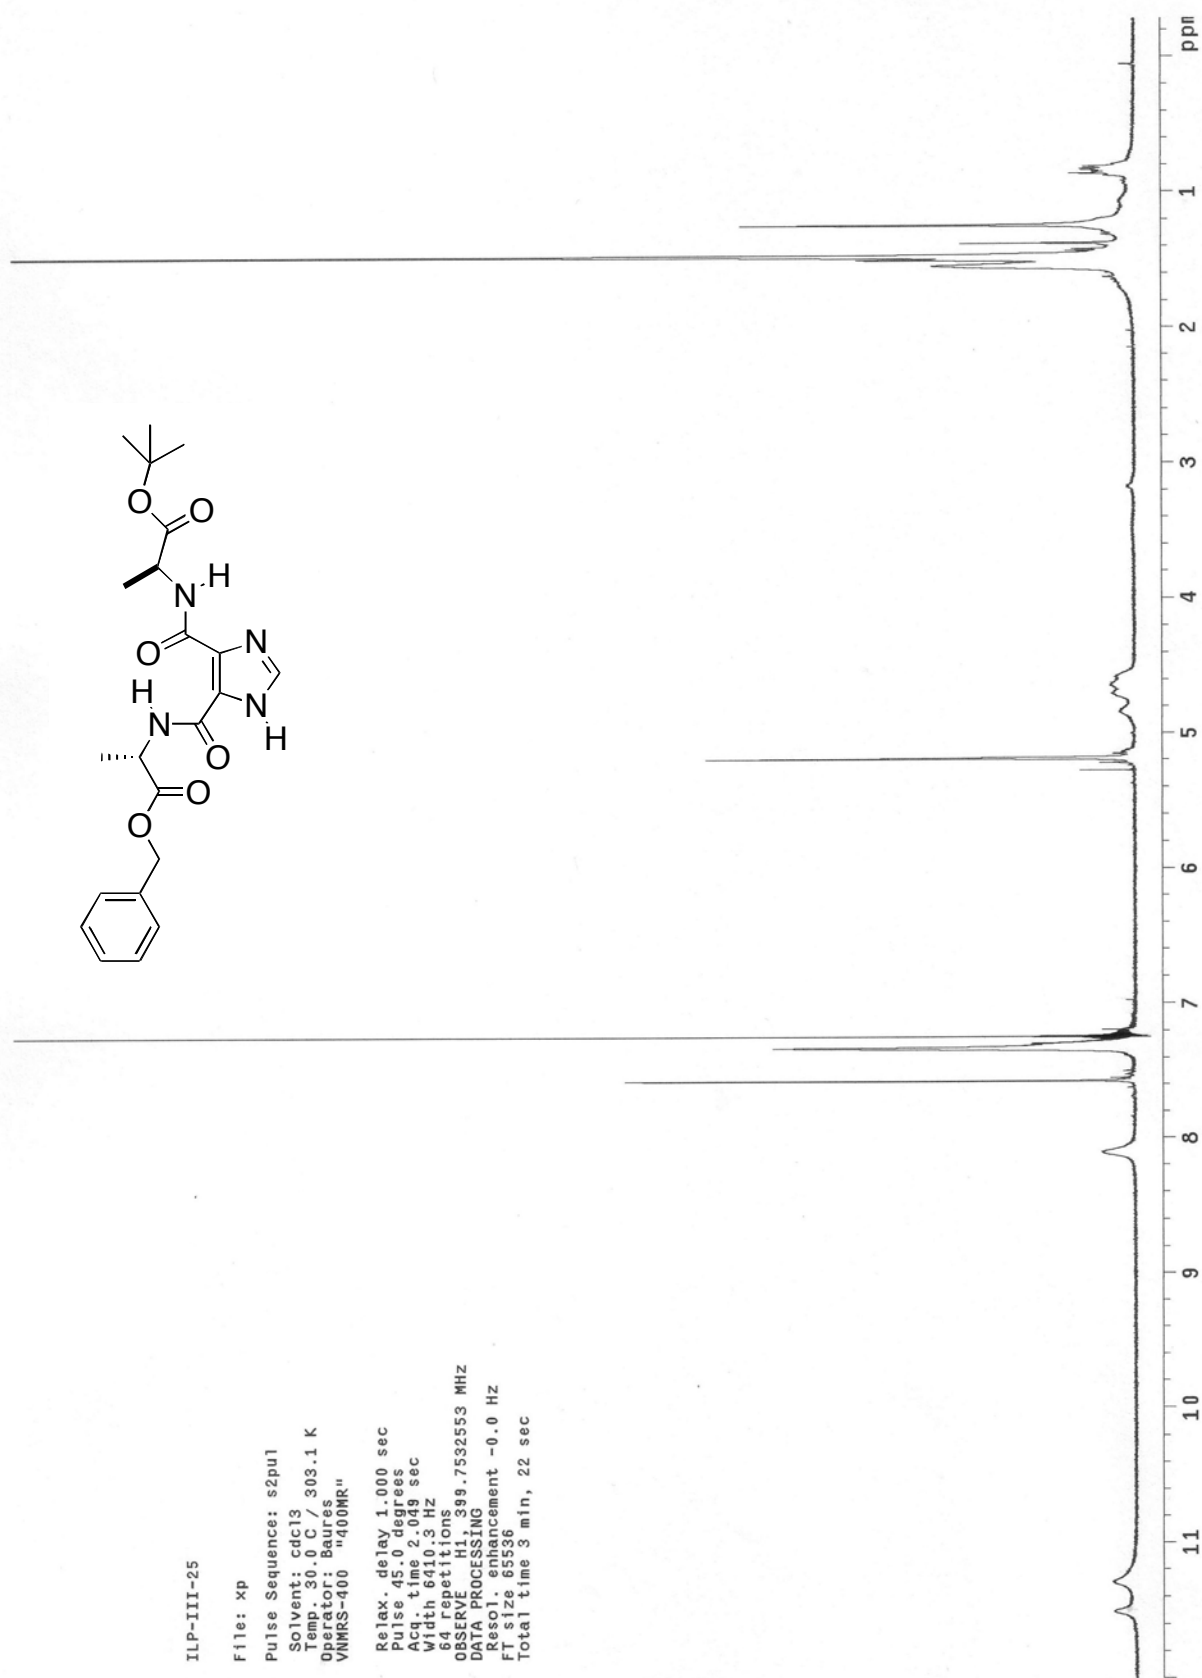

Figure S62. <sup>1</sup>H-NMR for 4{25}.



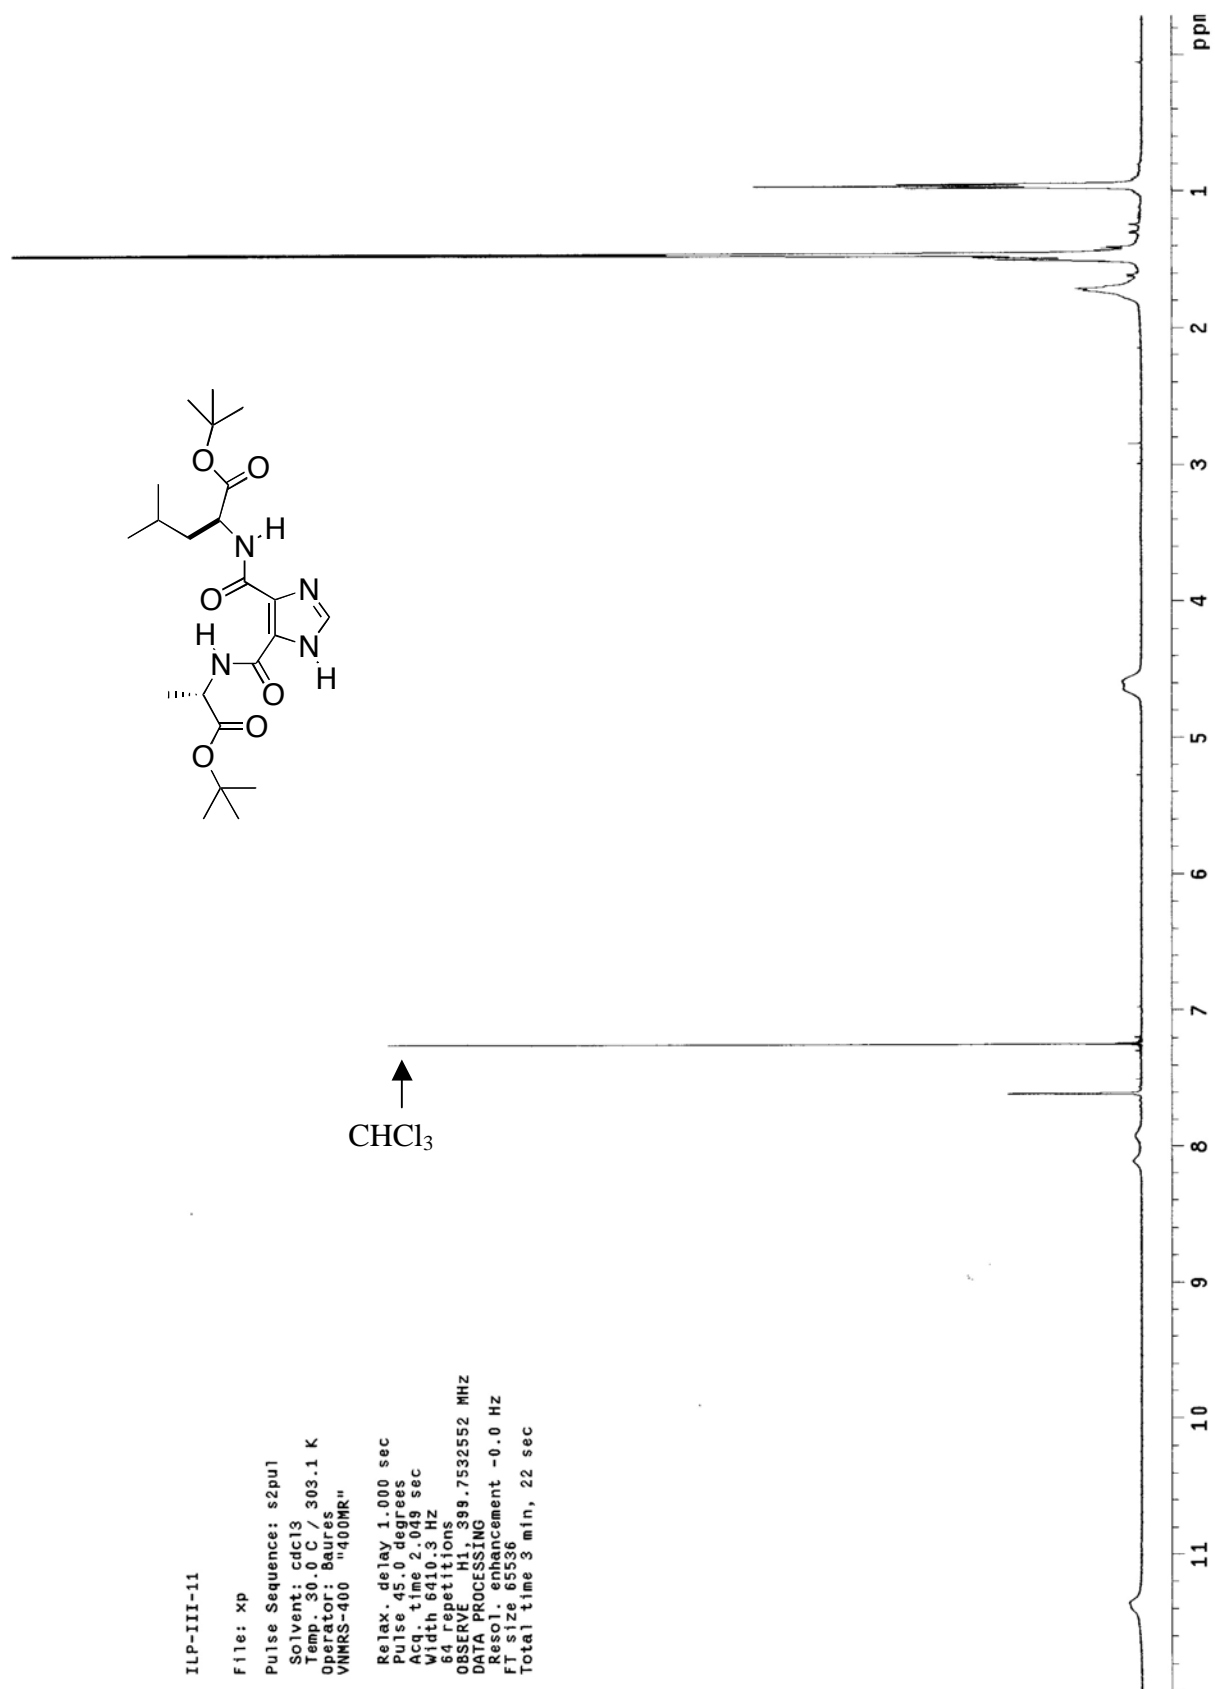

Figure S63. <sup>1</sup>H-NMR for 4{26}.

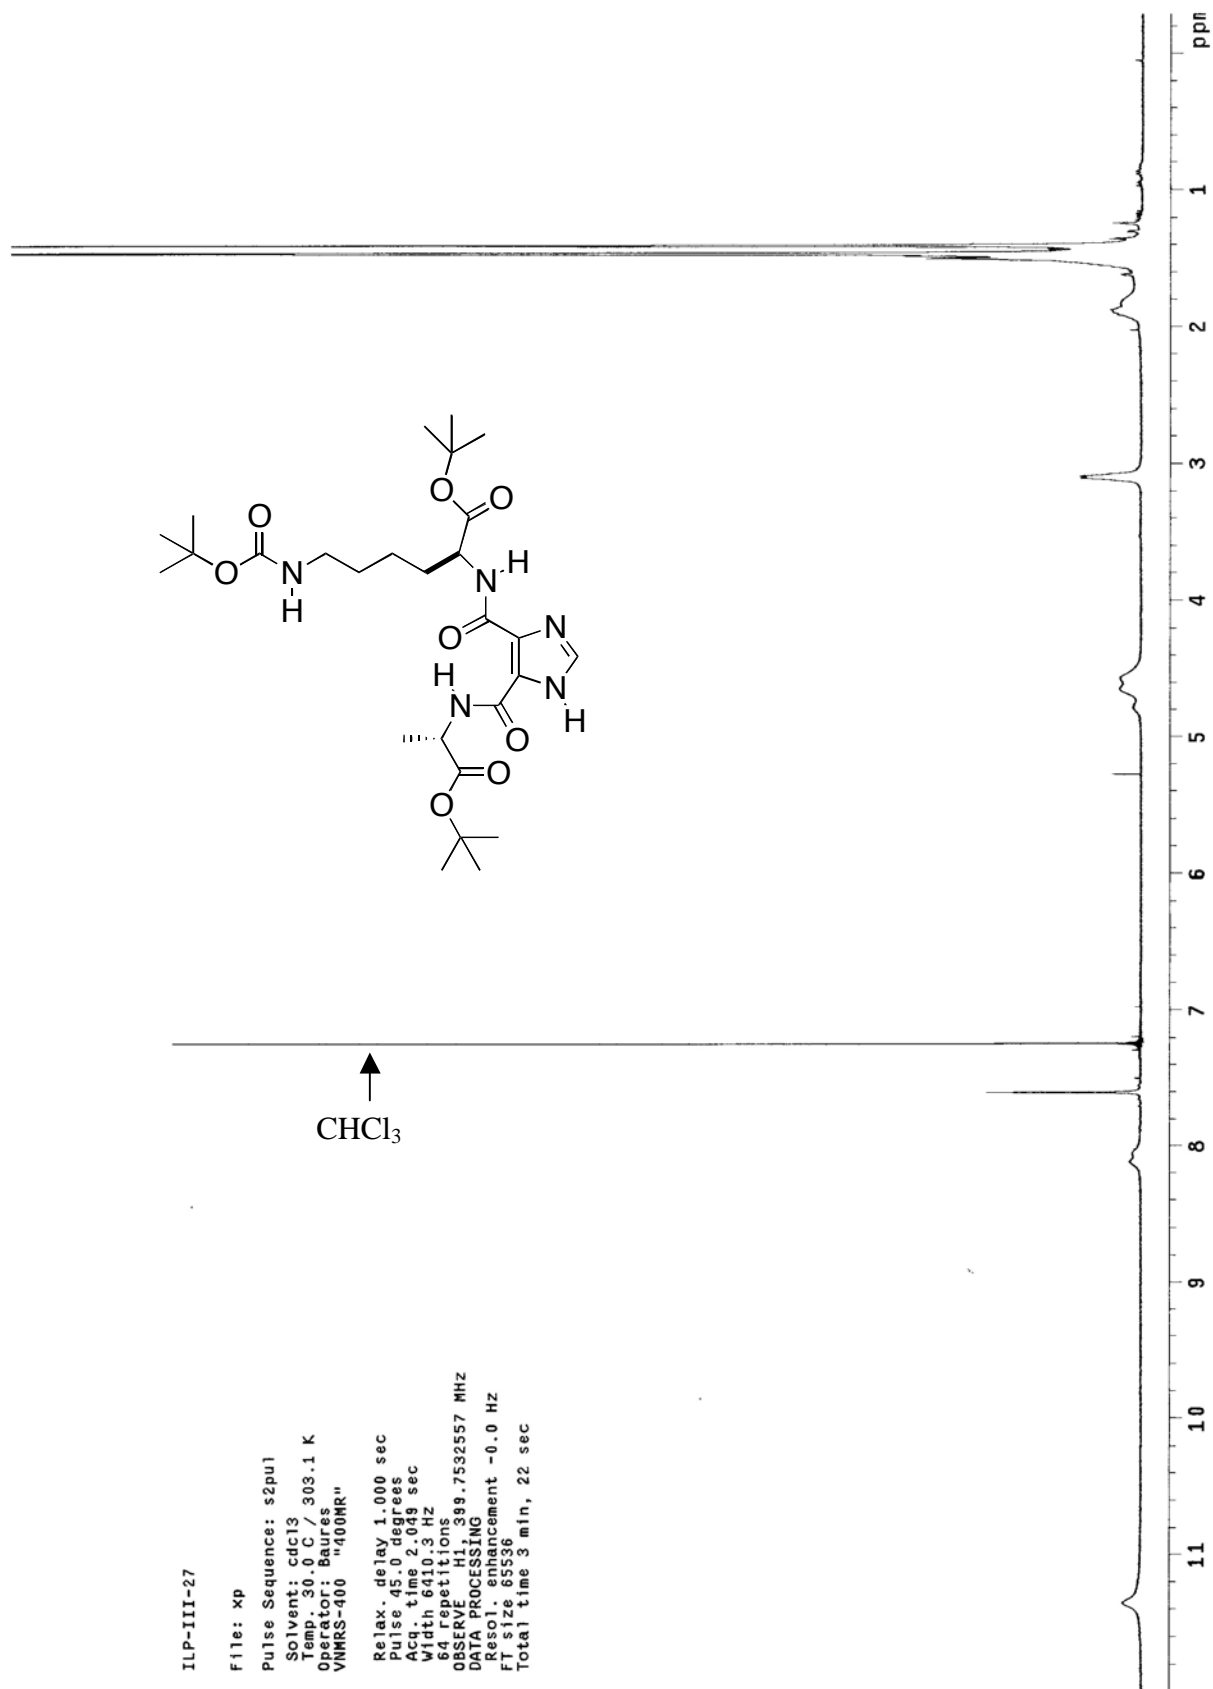

Figure S64. <sup>1</sup>H-NMR for 4{30}.

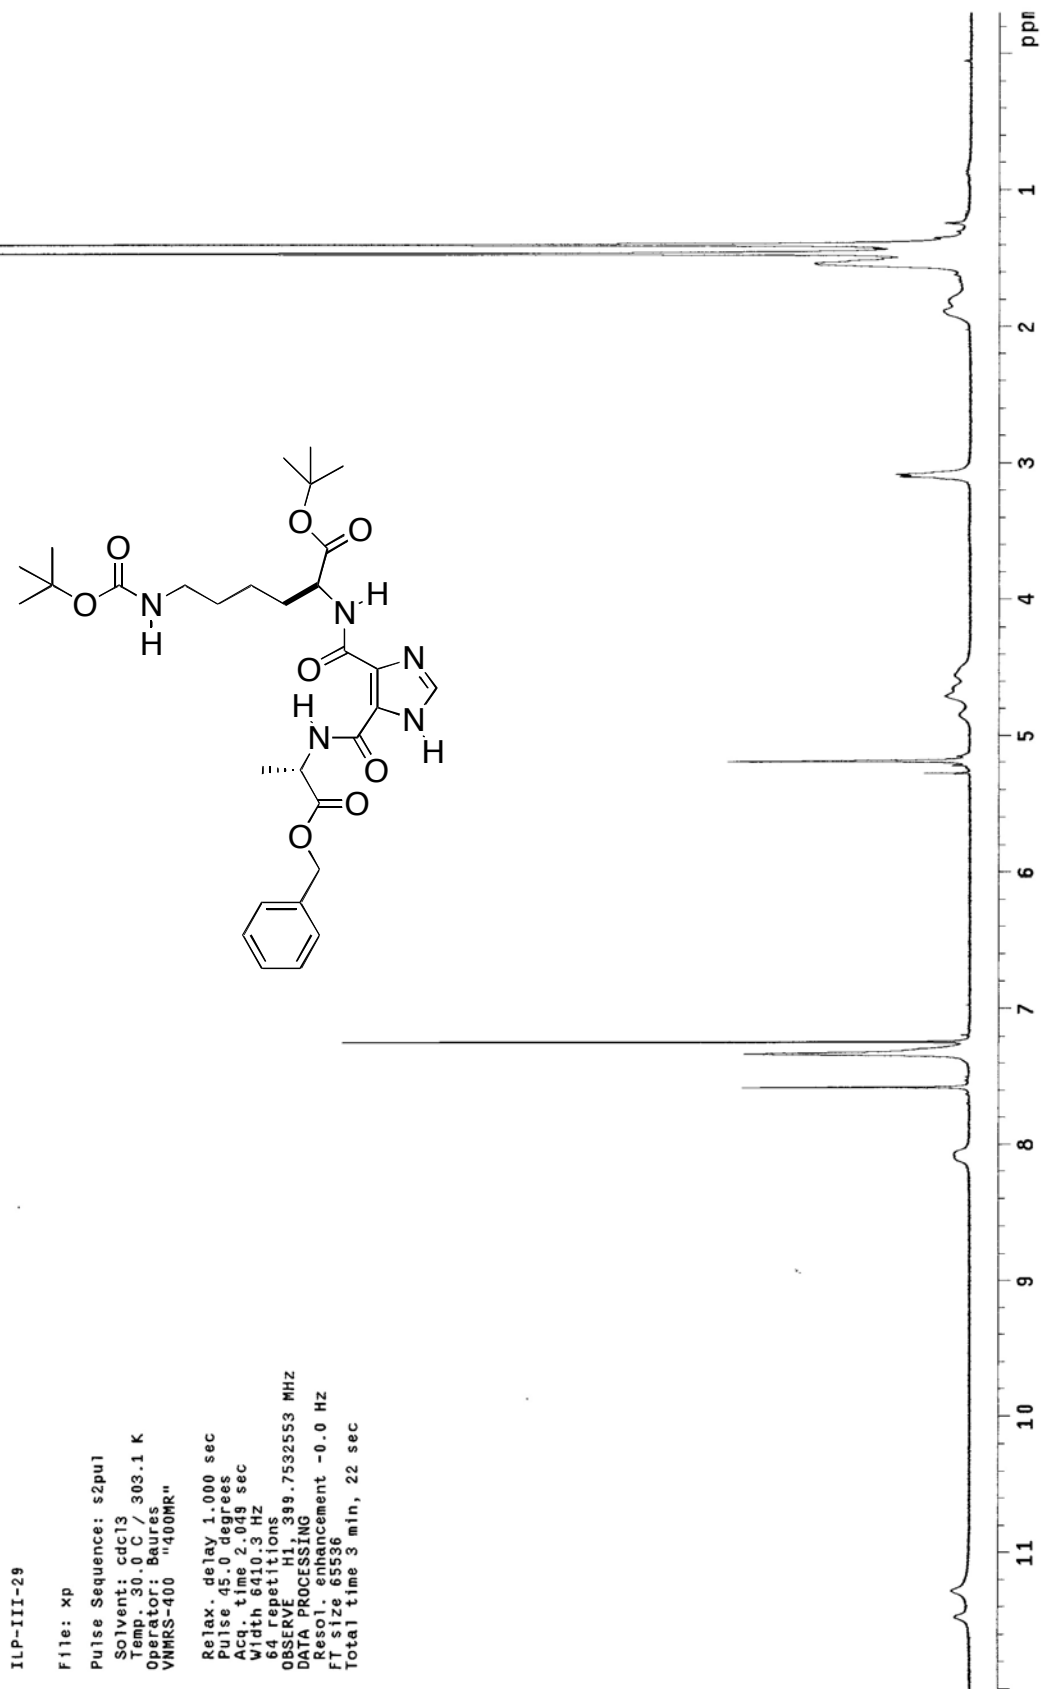

Figure S65.  $^1\text{H-NMR}$  for 4{35}.

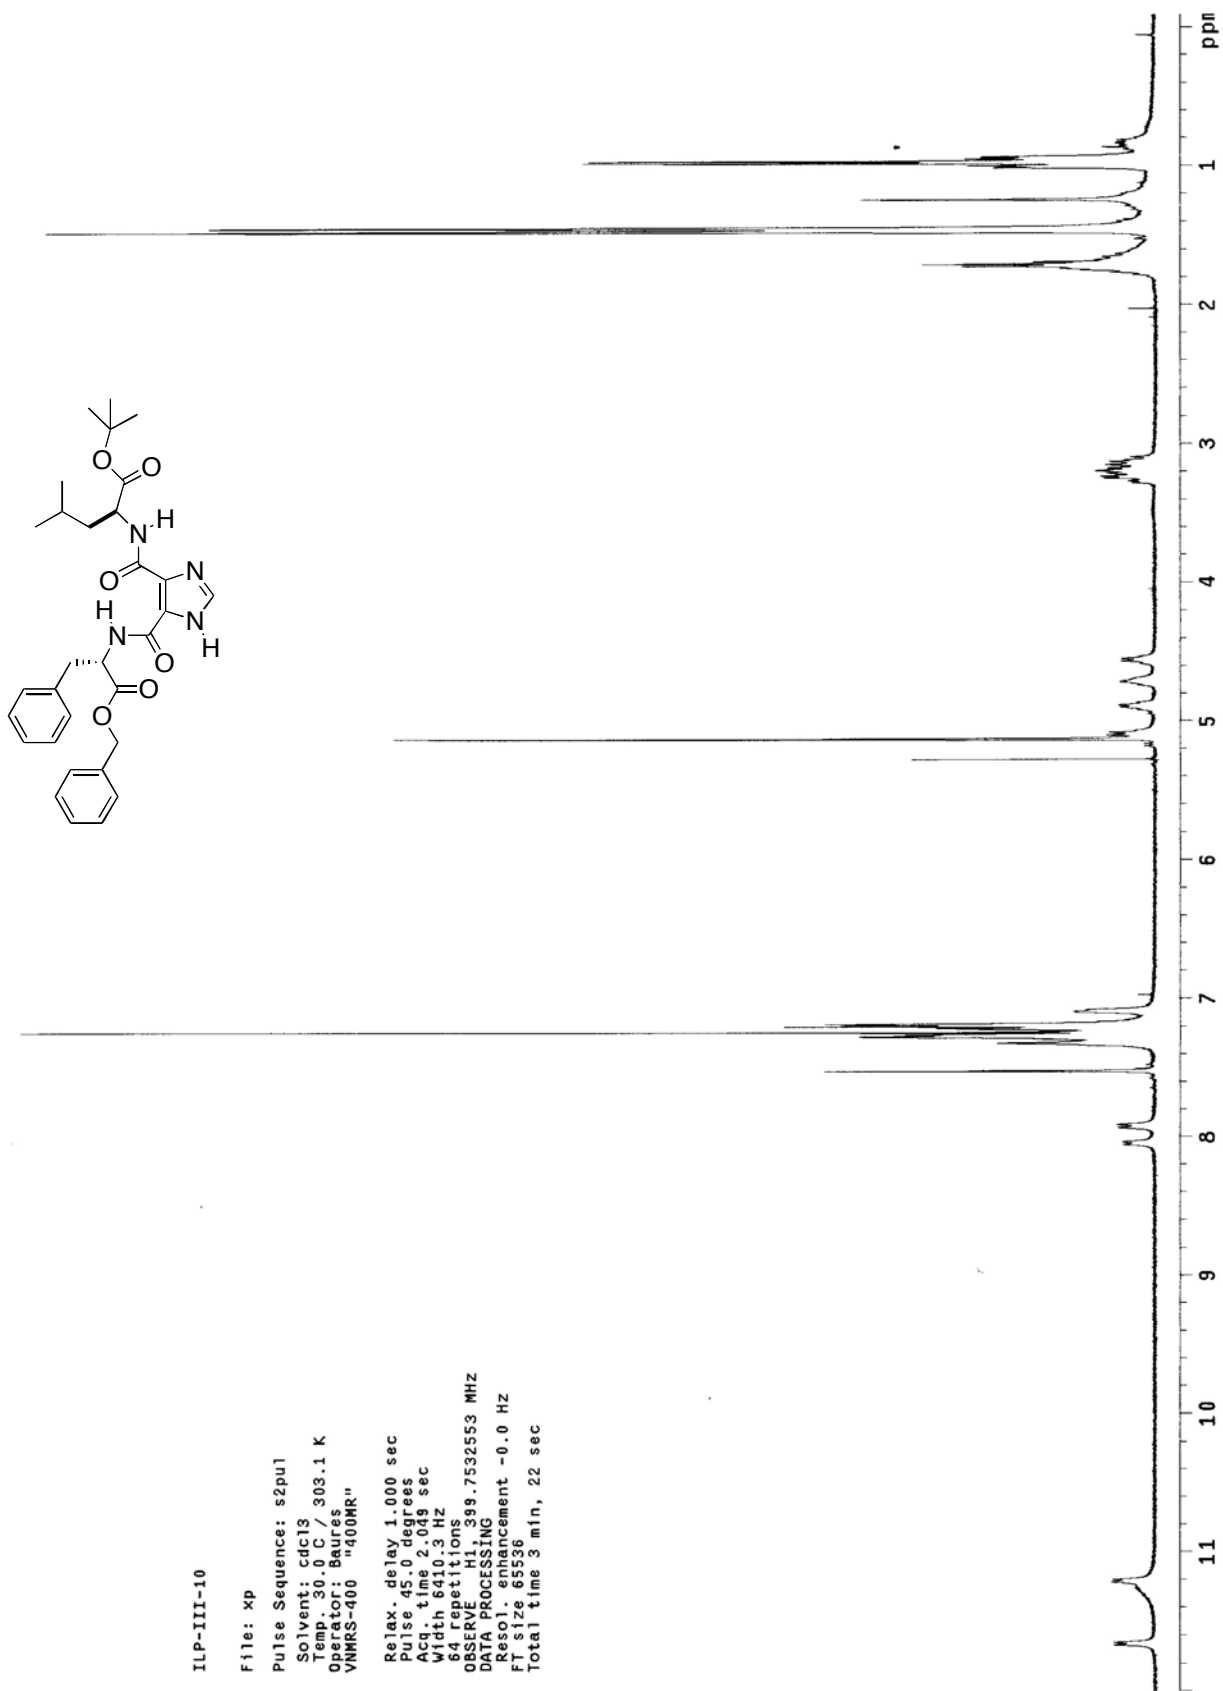

Figure S66. <sup>1</sup>H-NMR for 4{38}.

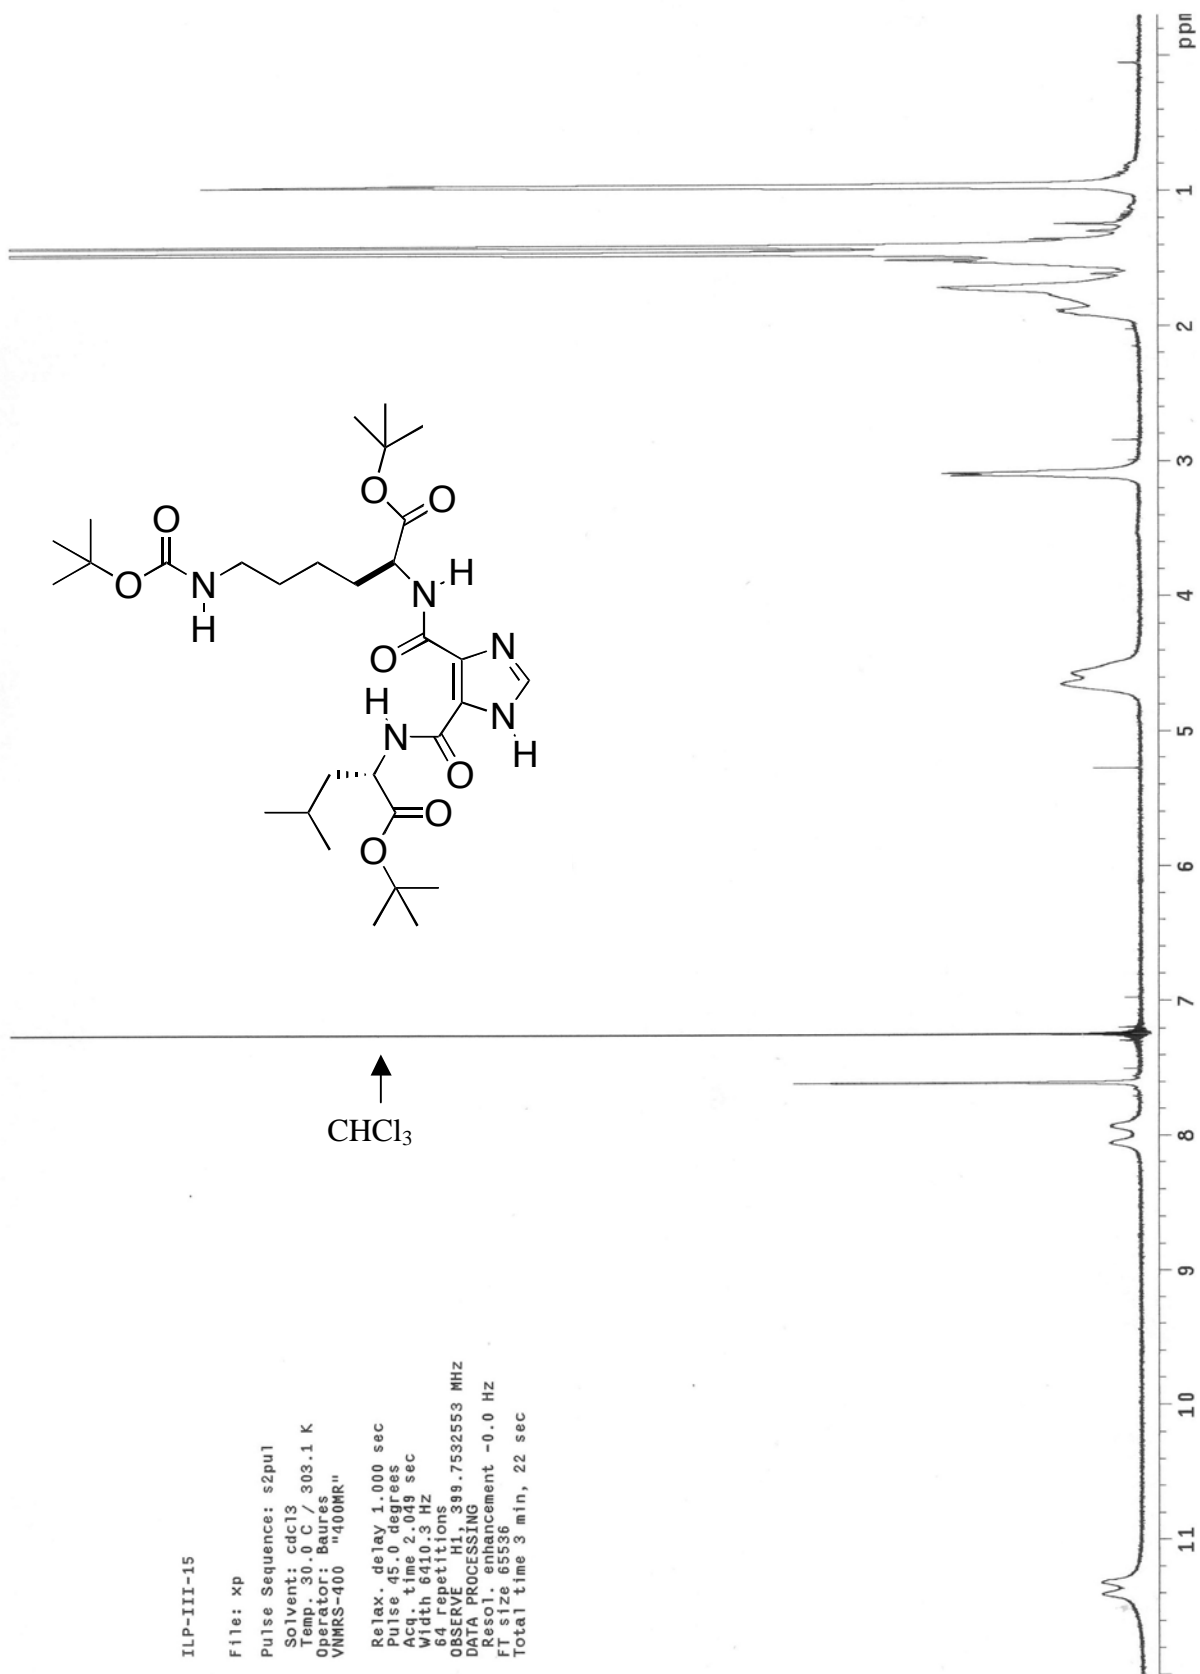

Figure S67. <sup>1</sup>H-NMR for 4{39}.

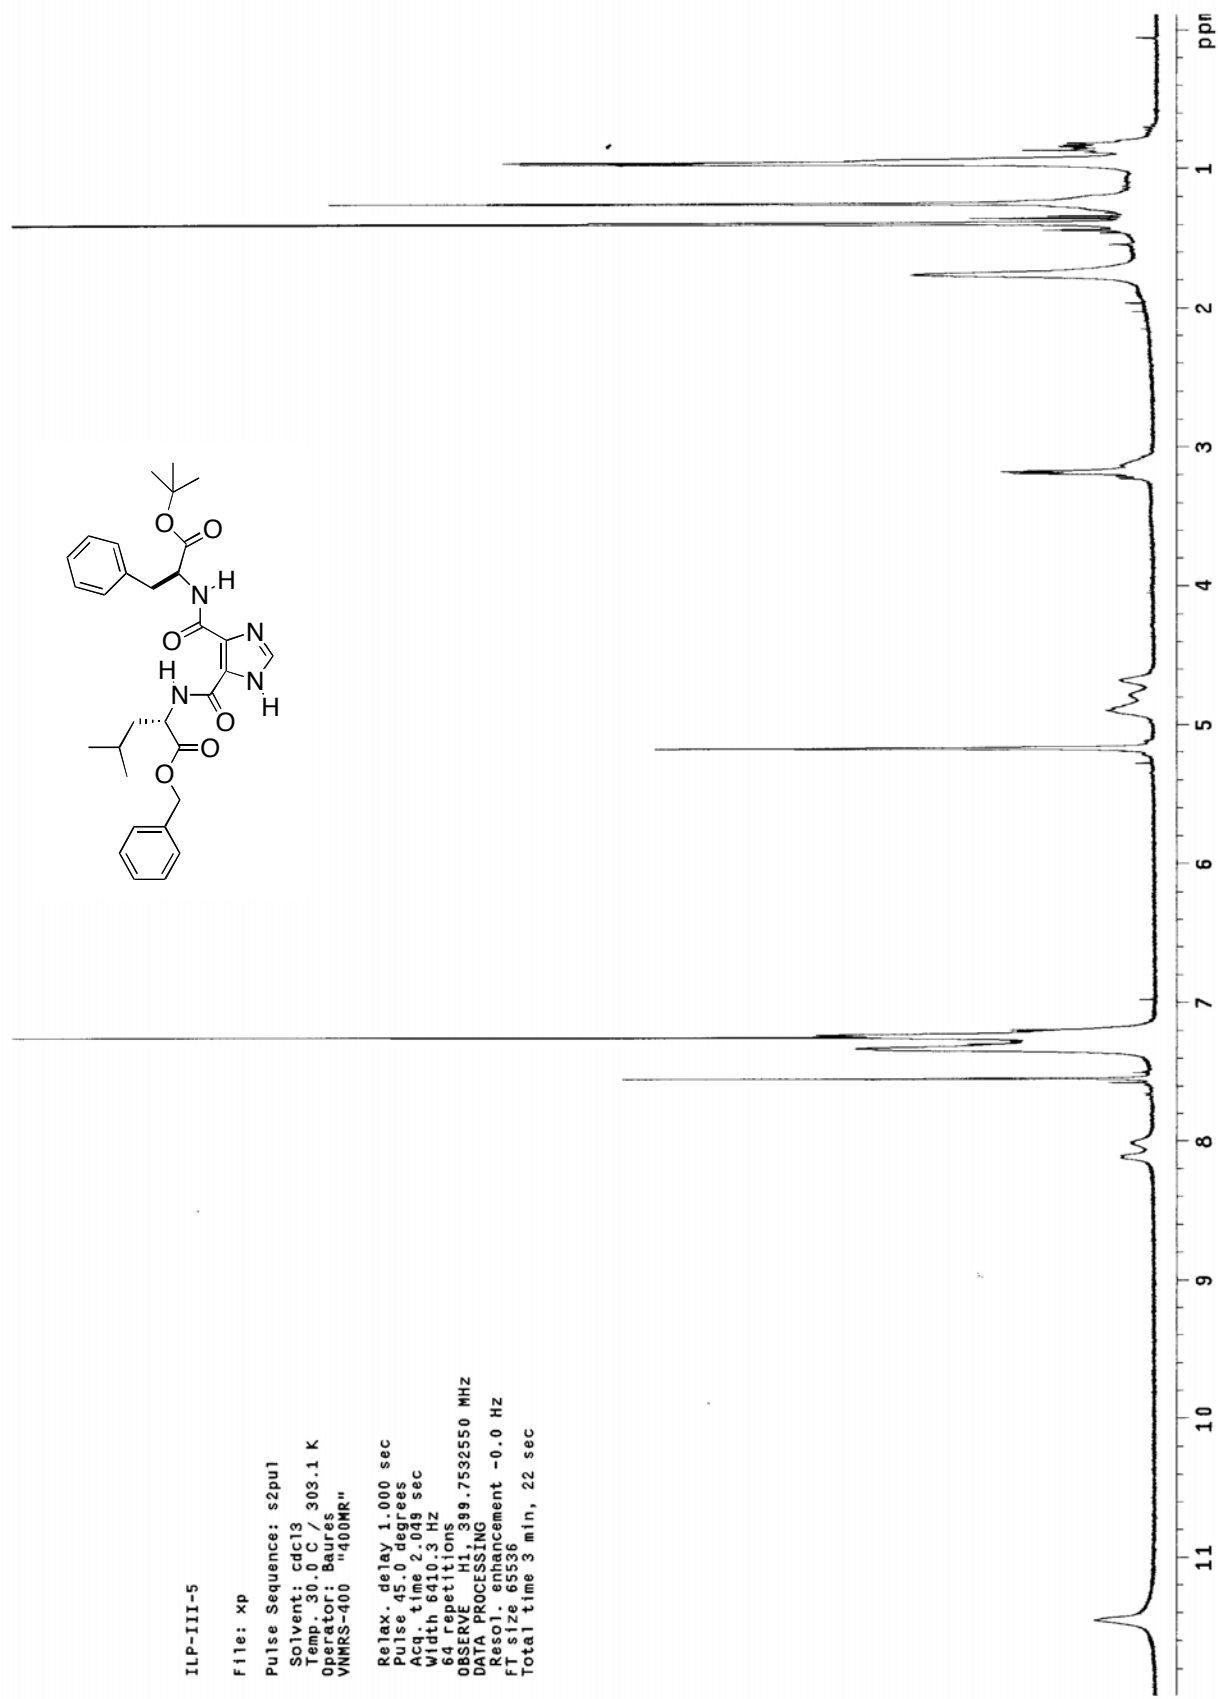

Figure S68.  $^1\text{H-NMR}$  for 4{40}.

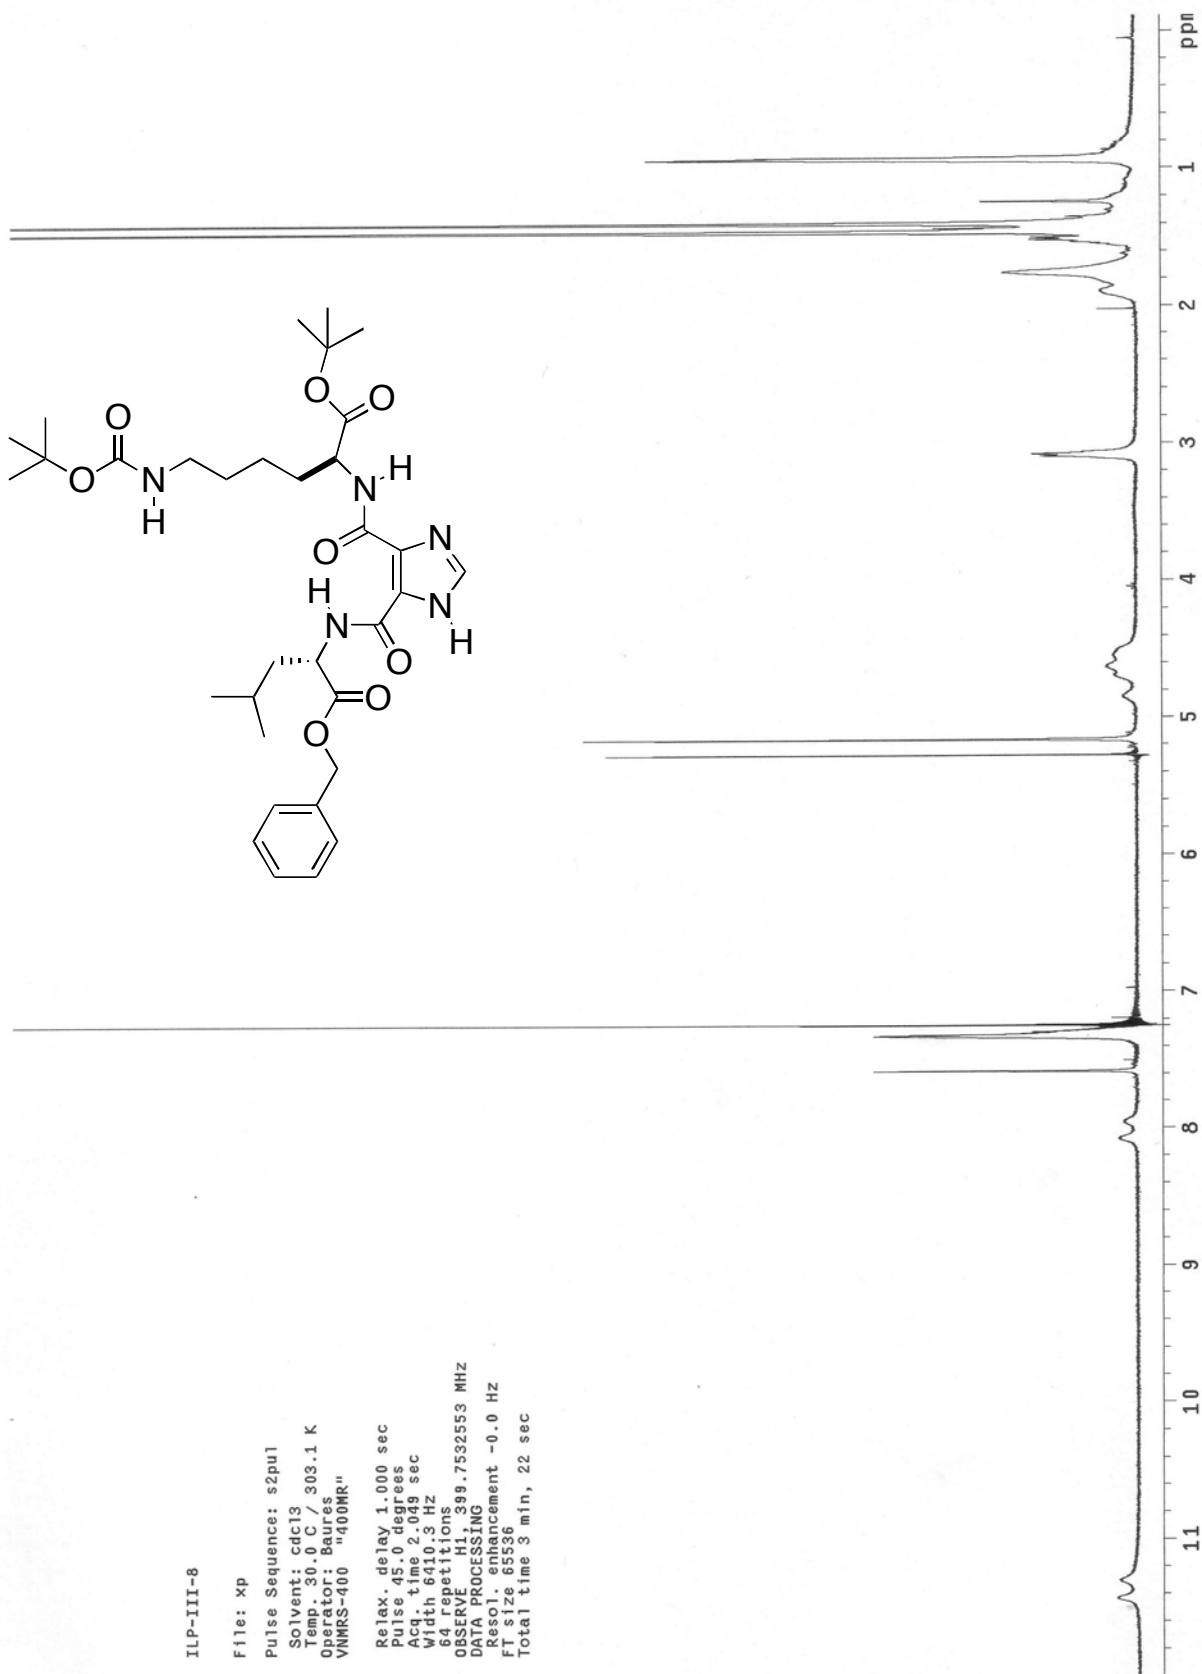

Figure S69. <sup>1</sup>H-NMR for 4{42}.

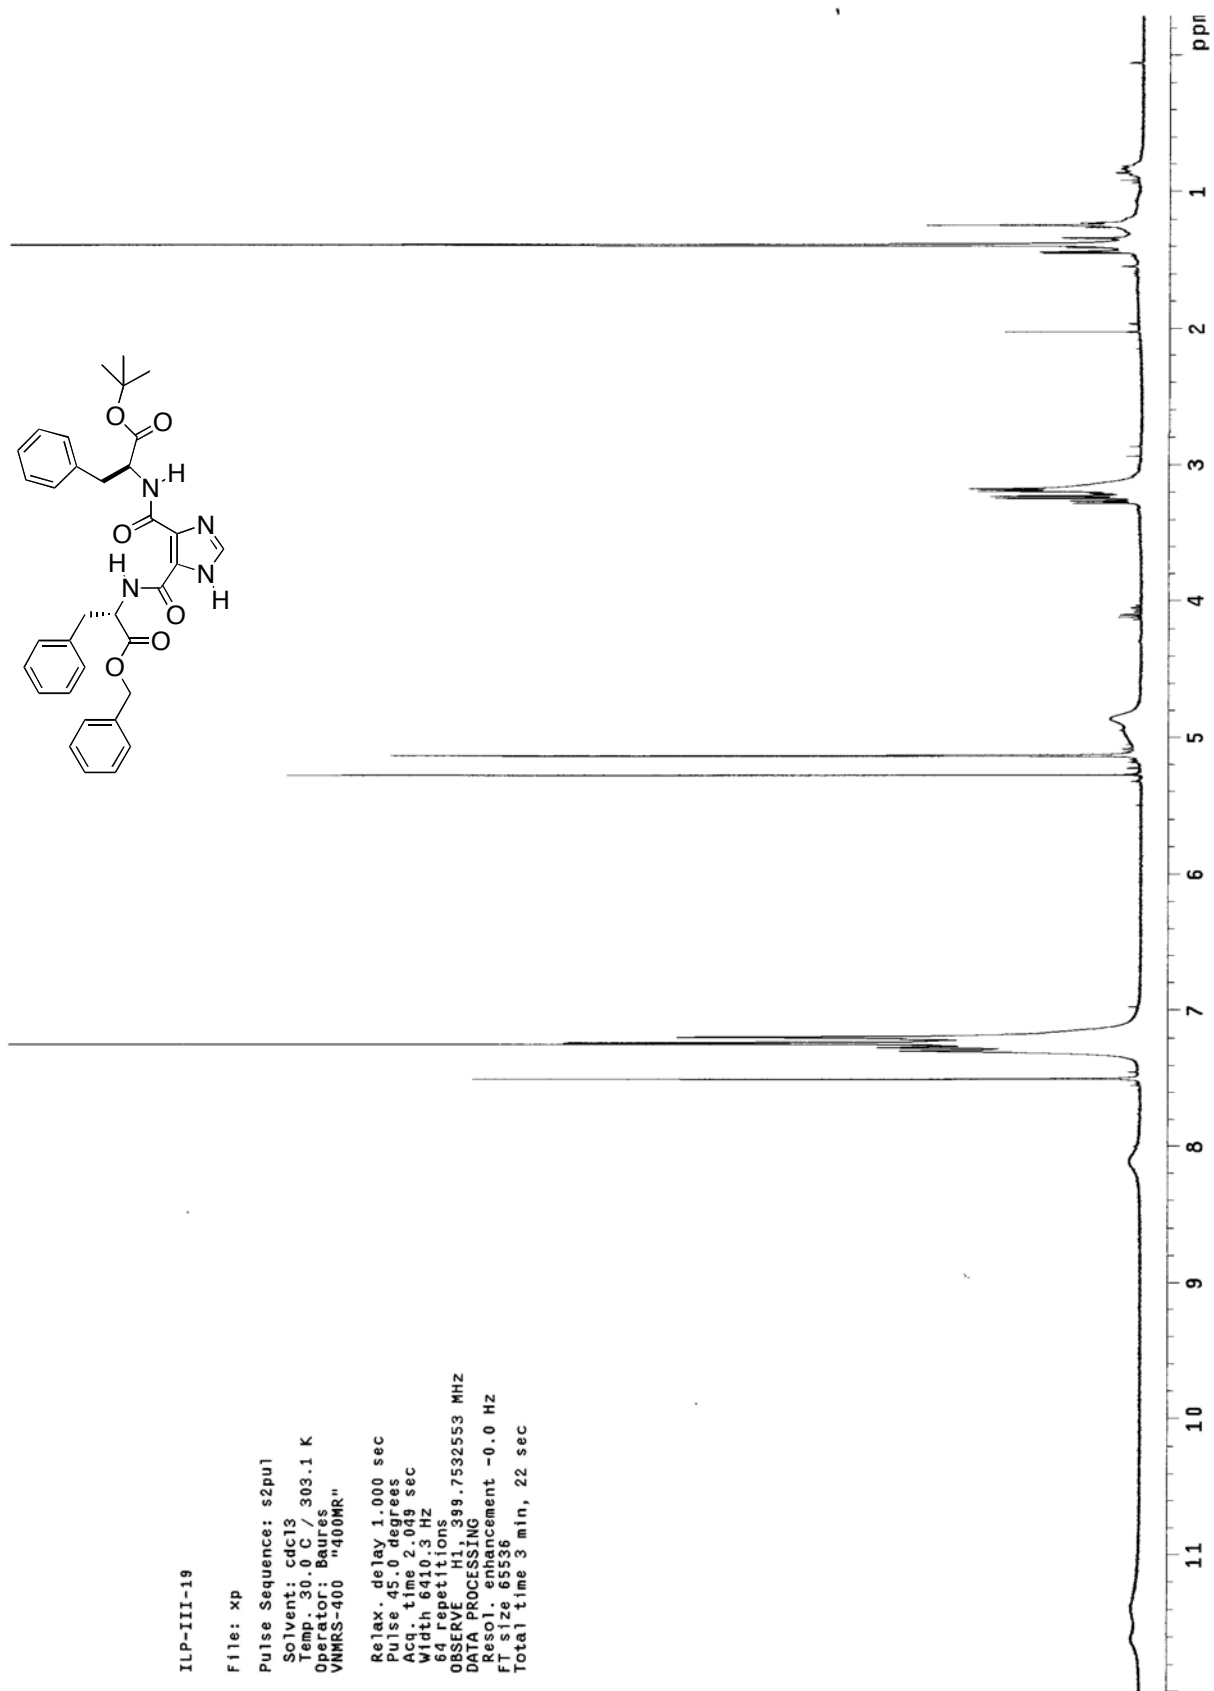

Figure S70. <sup>1</sup>H-NMR for 4{43}.



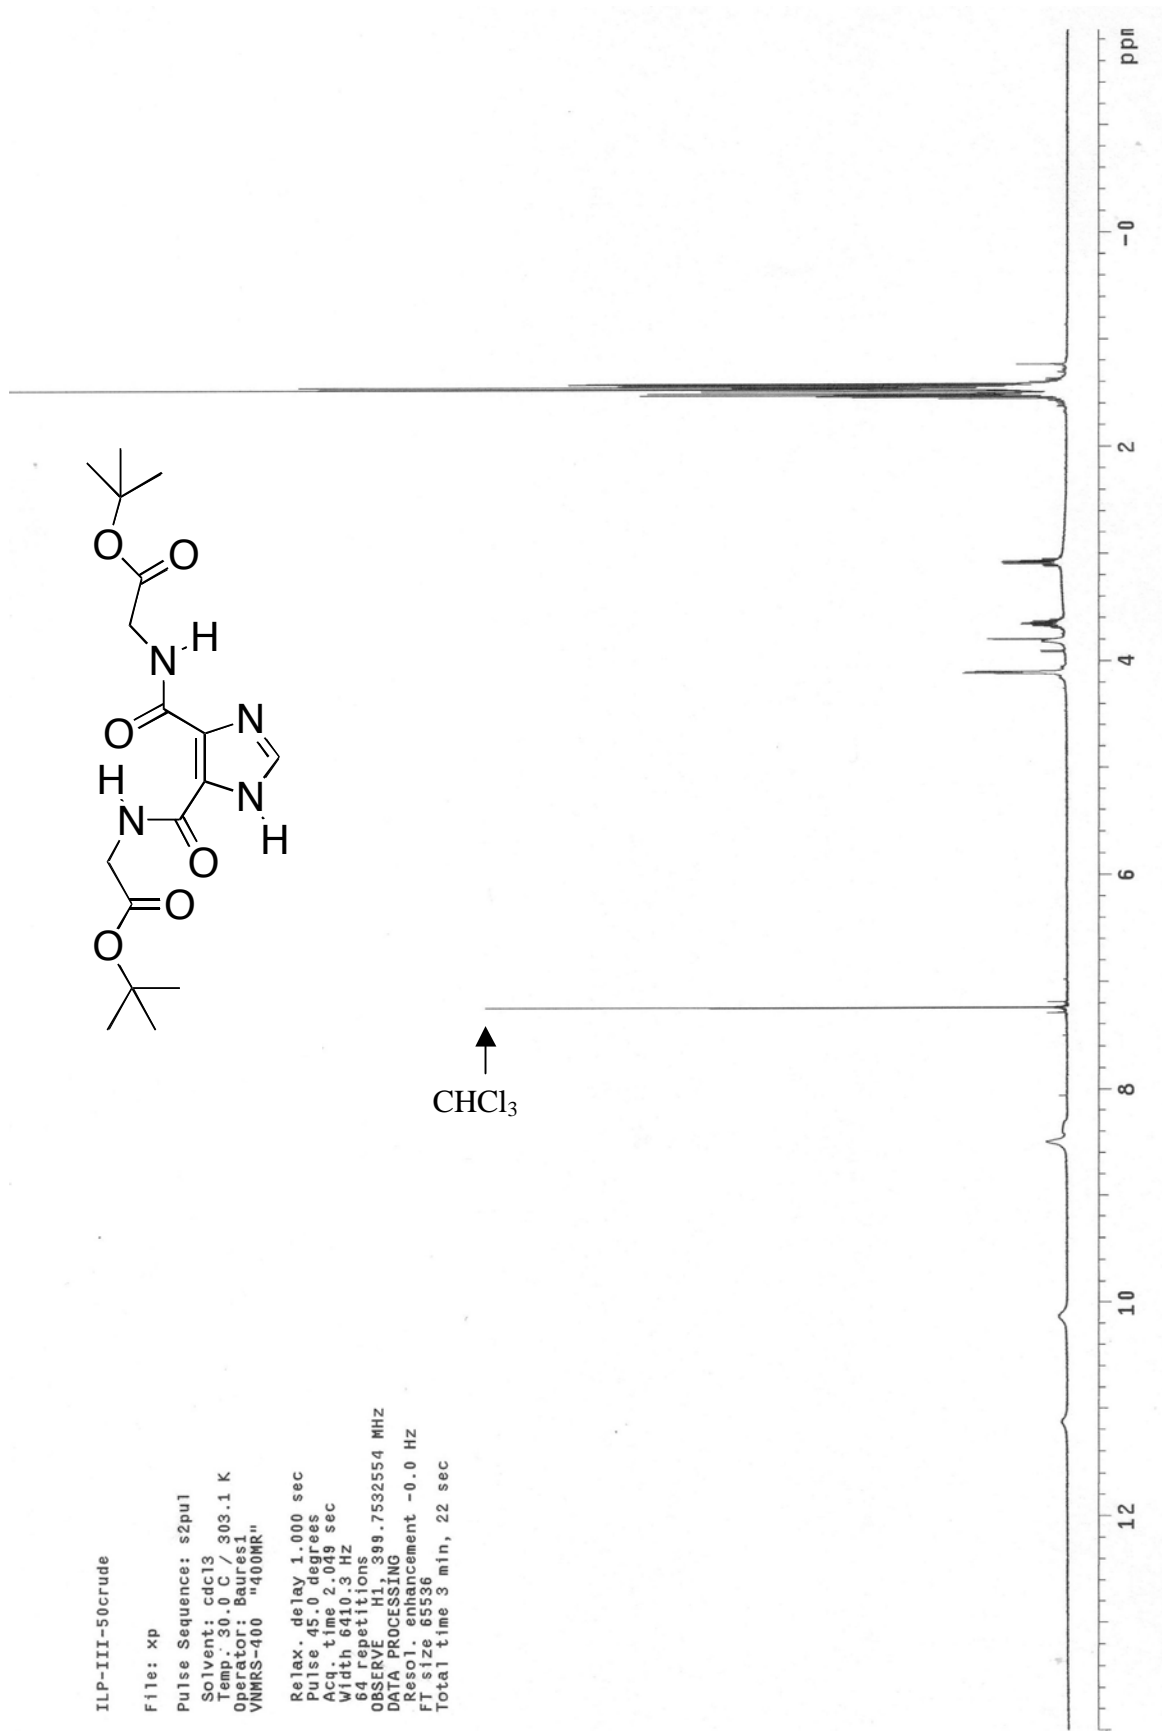

**Figure S71.**  $^1\text{H-NMR}$  for the crude reaction to yield **4{1}**.

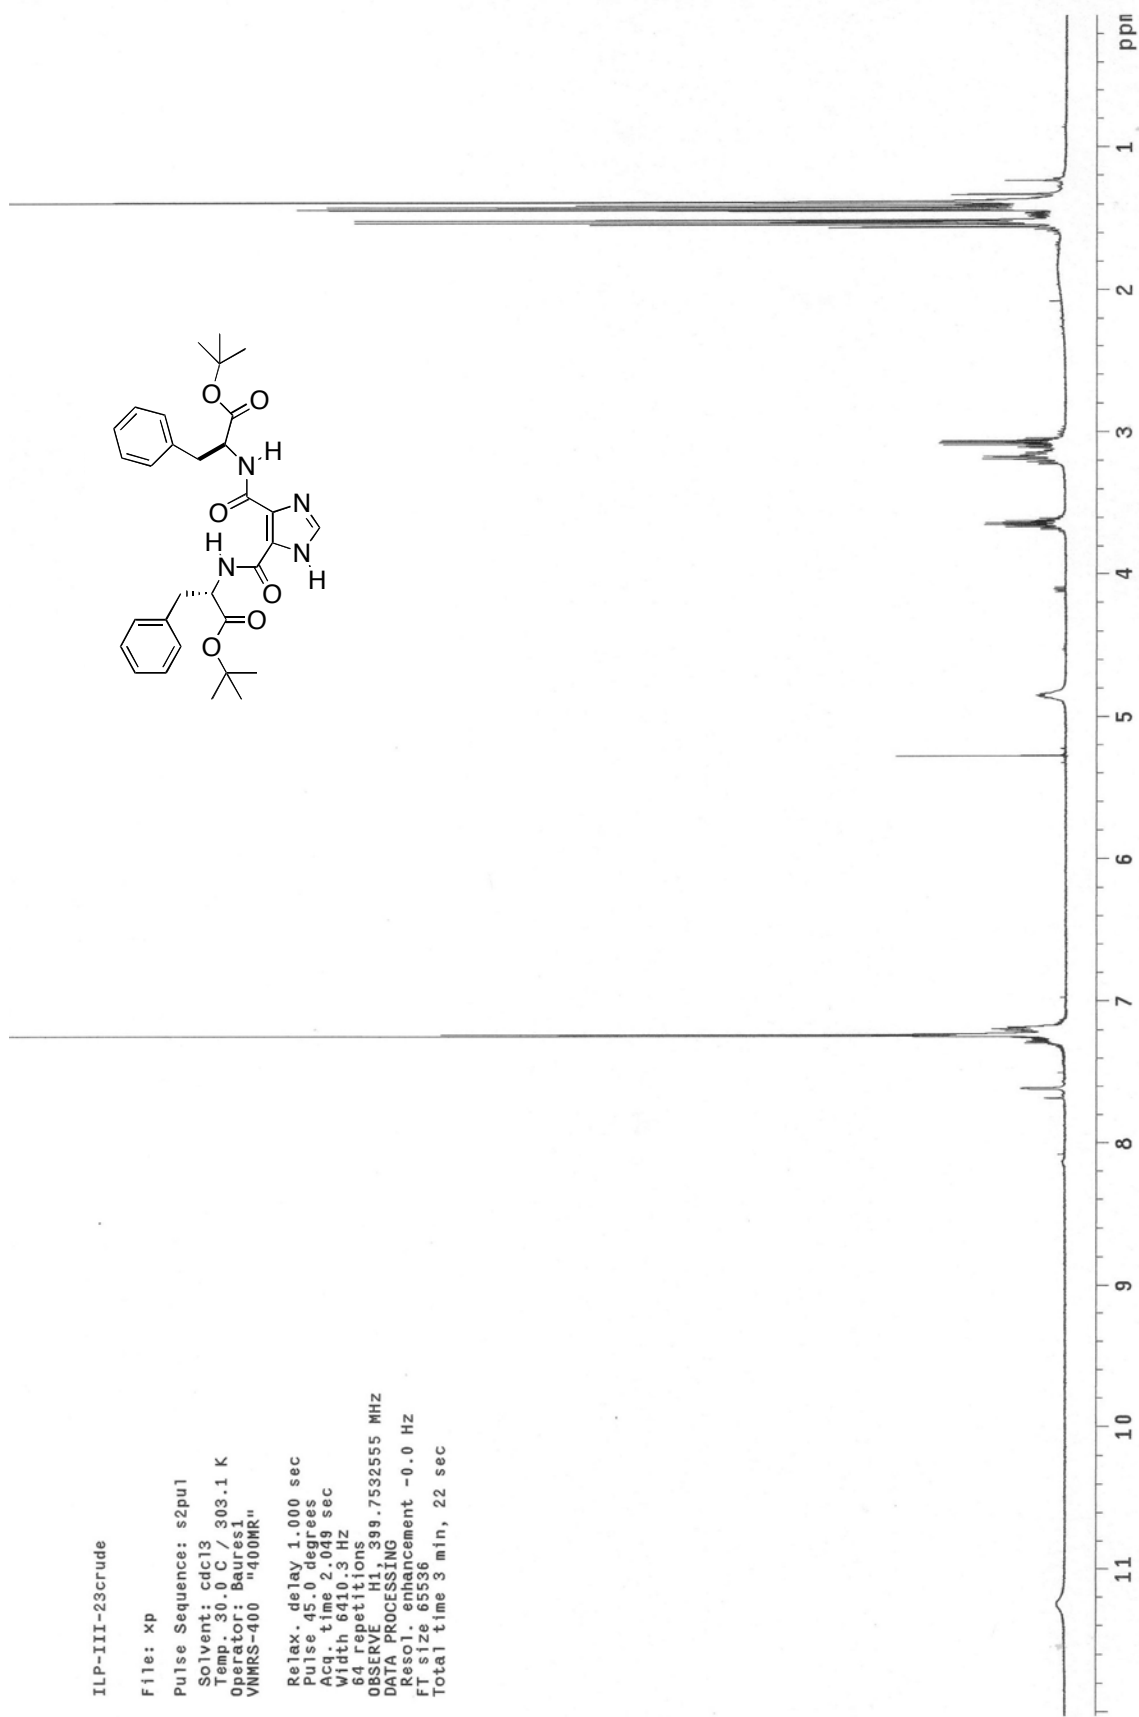

Figure S72. <sup>1</sup>H-NMR for the crude reaction to yield **4{7}**.

ILP-III-17crude

File: xp

Pulse Sequence: s2pu1

Solvent: cdc13  
Temp. 30.0 C / 303.1 K  
Operator: Baures1  
VNMR-400 "400MR"

Relax. delay 1.000 sec  
Pulse 45.0 degrees  
Acq. time 2.049 sec  
Width 6410.3 Hz  
64 repetitions  
OBSERVE H1, 399.7532553 MHz  
DATA PROCESSING  
Resol. enhancement -0.0 Hz  
F1 size 65536  
Total time 3 min, 22 sec

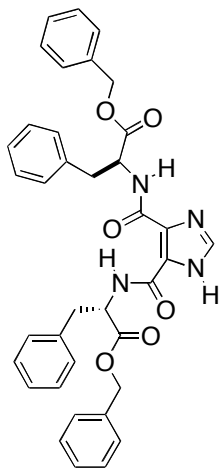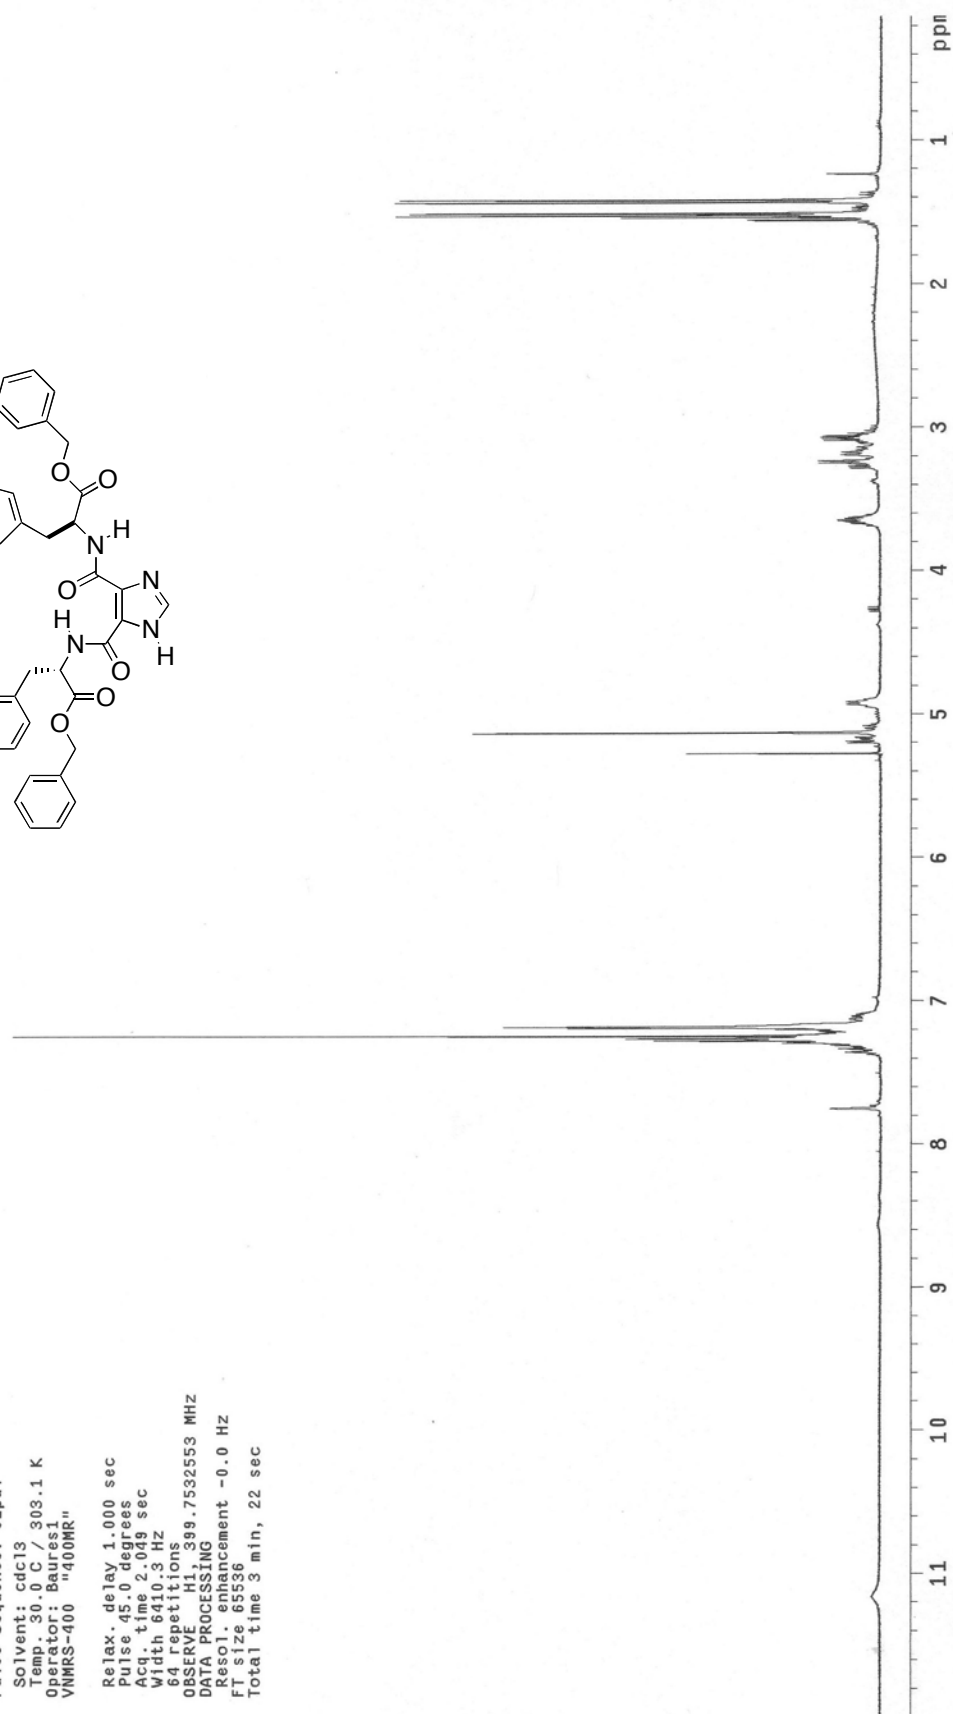

Figure S73. <sup>1</sup>H-NMR for the crude reaction to yield 4{8}.

ILP-III-47crude

File: xp

Pulse Sequence: s2pu1

Solvent: cdCl3

Temp. 30.0 C / 303.1 K

Operator: Baures1

VNMR5-400

"400MR"

Relax. delay 1.000 sec

Pulse 45.0 degrees

Acq. time 2.049 sec

Width 6410.3 Hz

64 repetitions

OBSERVE H1, 399.7532553 MHz

DATA PROCESSING

Resol. enhancement -0.0 Hz

FT size 65536

Total time 3 min, 22 sec

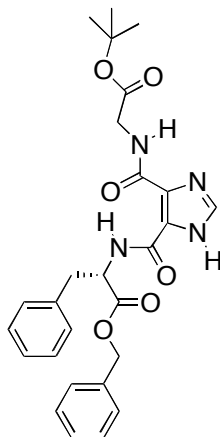

CHCl<sub>3</sub>

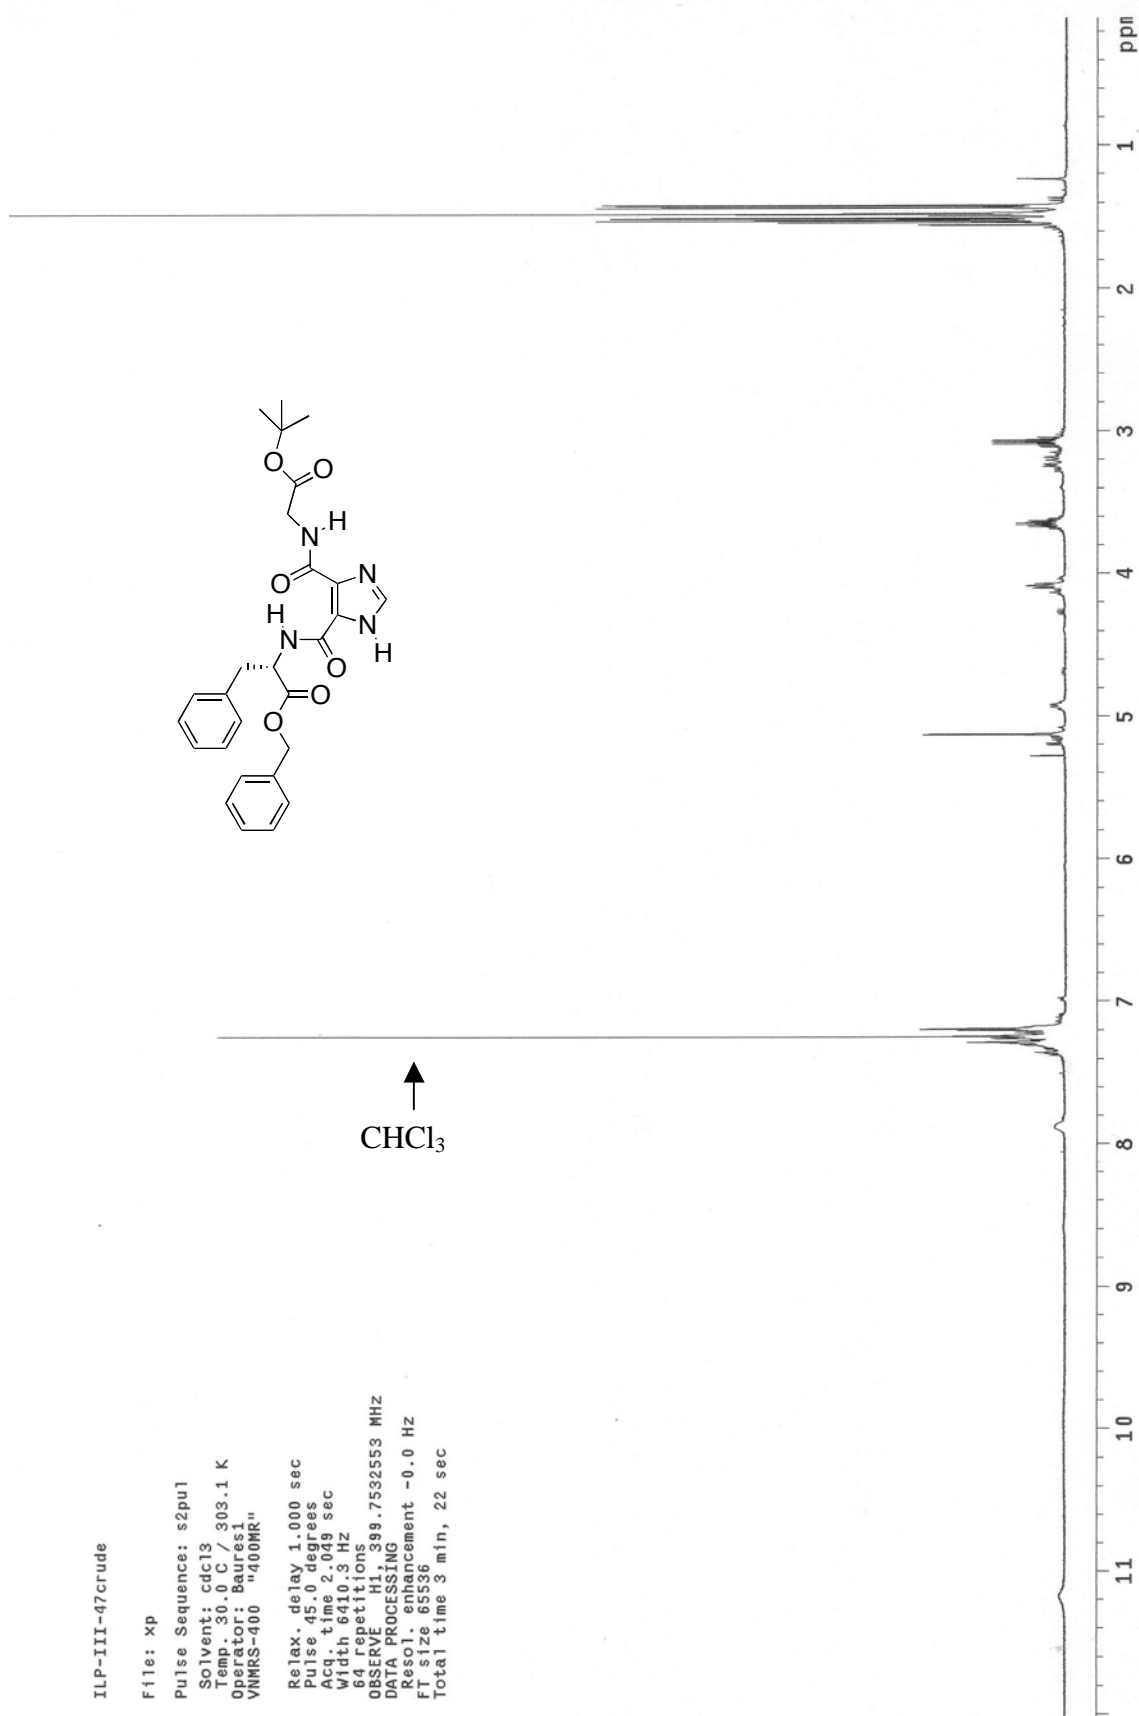

Figure S74. <sup>1</sup>H-NMR for the crude reaction to yield 4{16}.

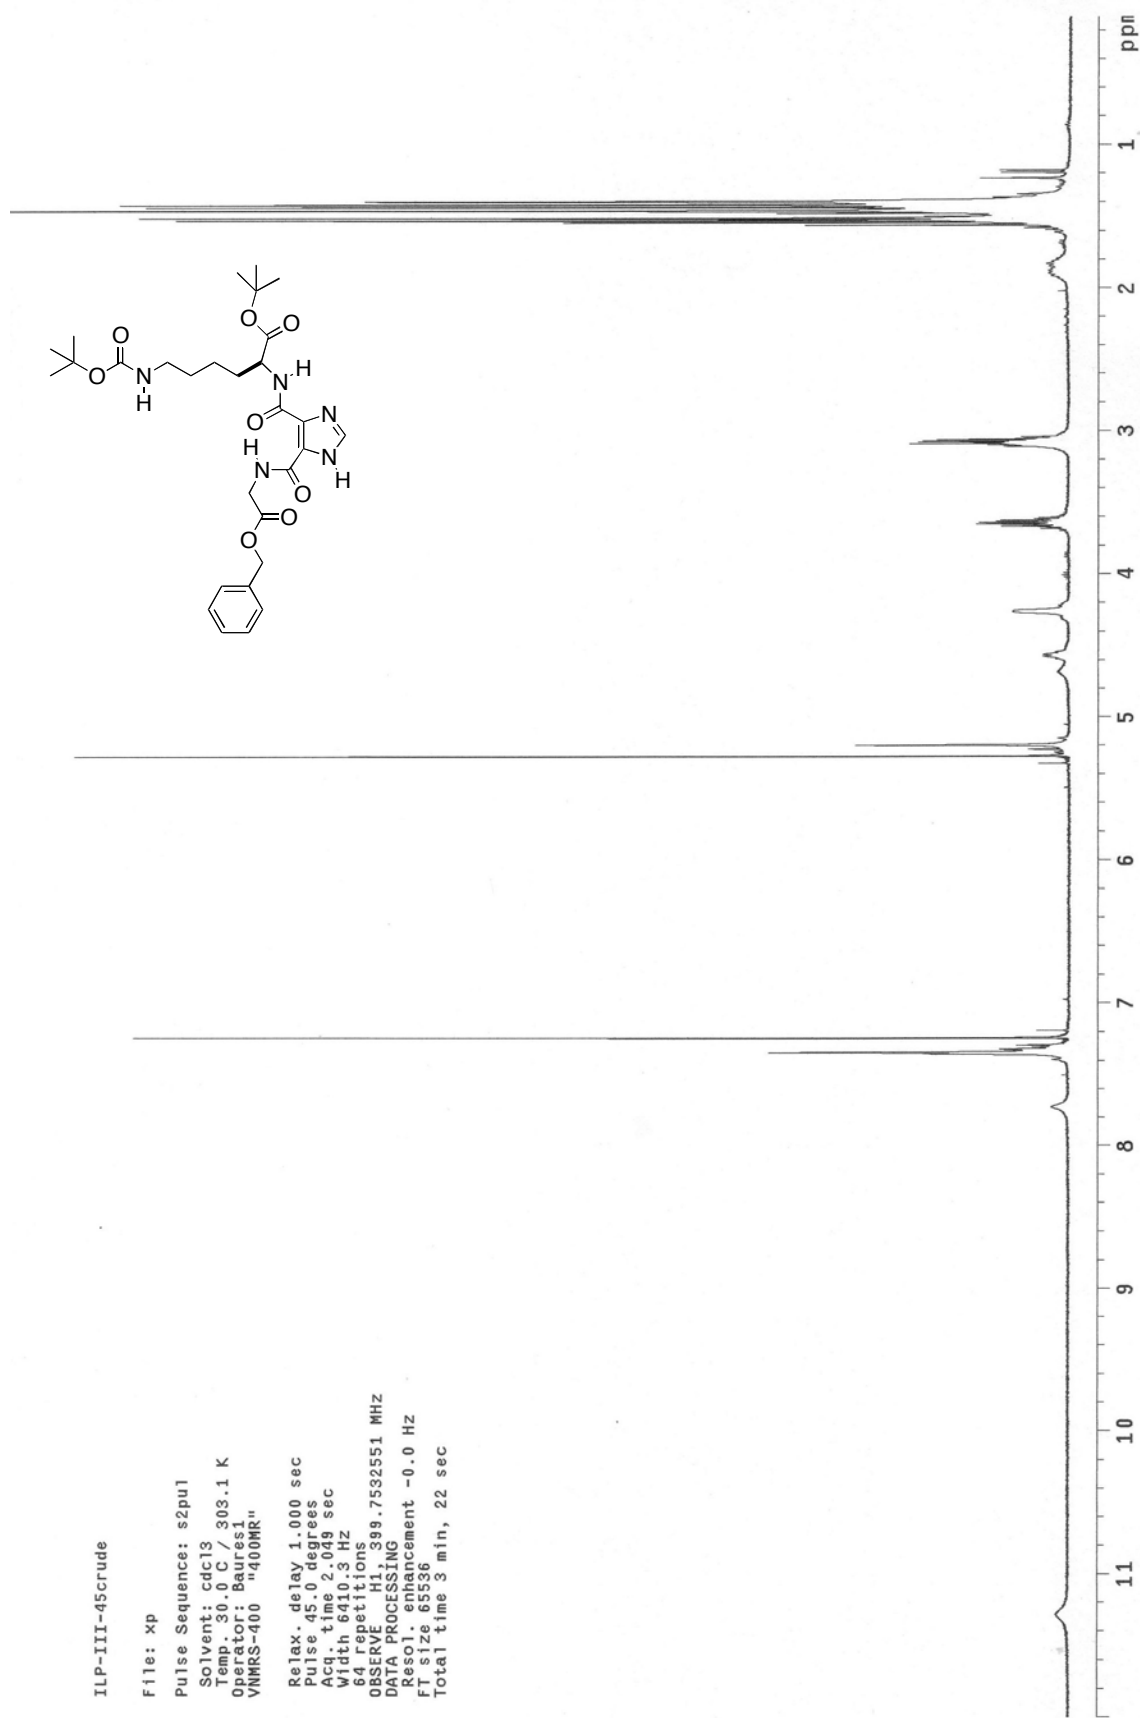

Figure S75. <sup>1</sup>H-NMR for the crude reaction to yield 4{24}.

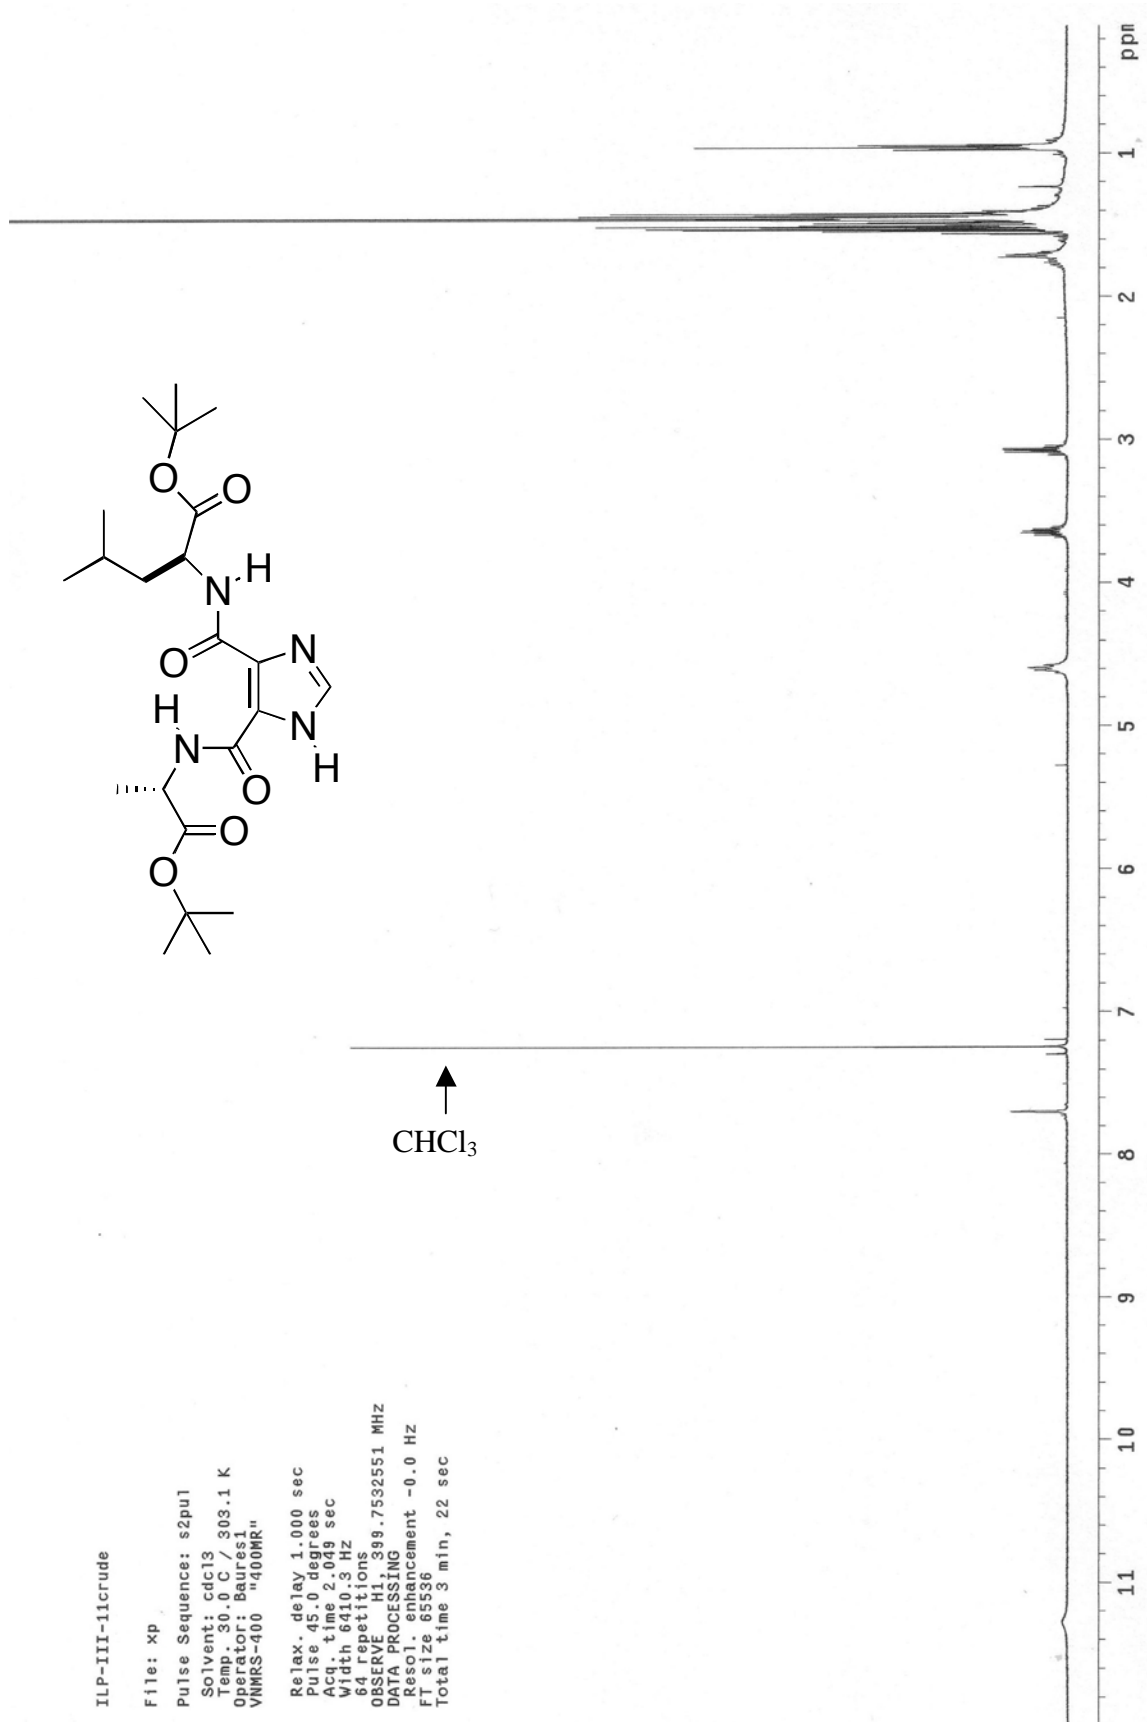

**Figure S76.**  $^1\text{H-NMR}$  for the crude reaction to yield **4{26}**.

ILP-III-27crude

File: xp

Pulse Sequence: s2pul

Solvent: cdc13

Temp: 30.0 C / 303.1 K

Operator: Baures1

VNMR5-400 "400MR"

Relax. delay 1.000 sec

Pulse 45.0 degrees

Acq. time 2.049 sec

Width 6410.3 Hz

64 repetitions

OBSERVE H1, 399.7532545 MHz

DATA PROCESSING

Resol. enhancement -0.0 Hz

FT size 65536

Total time 3 min, 22 sec

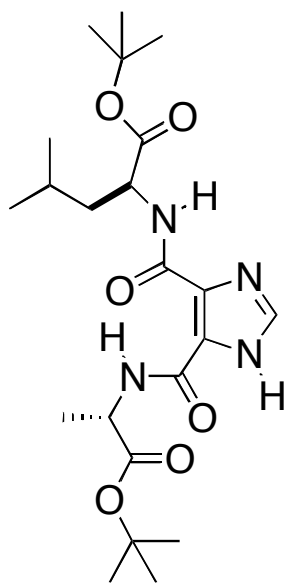

↑  
CHCl<sub>3</sub>

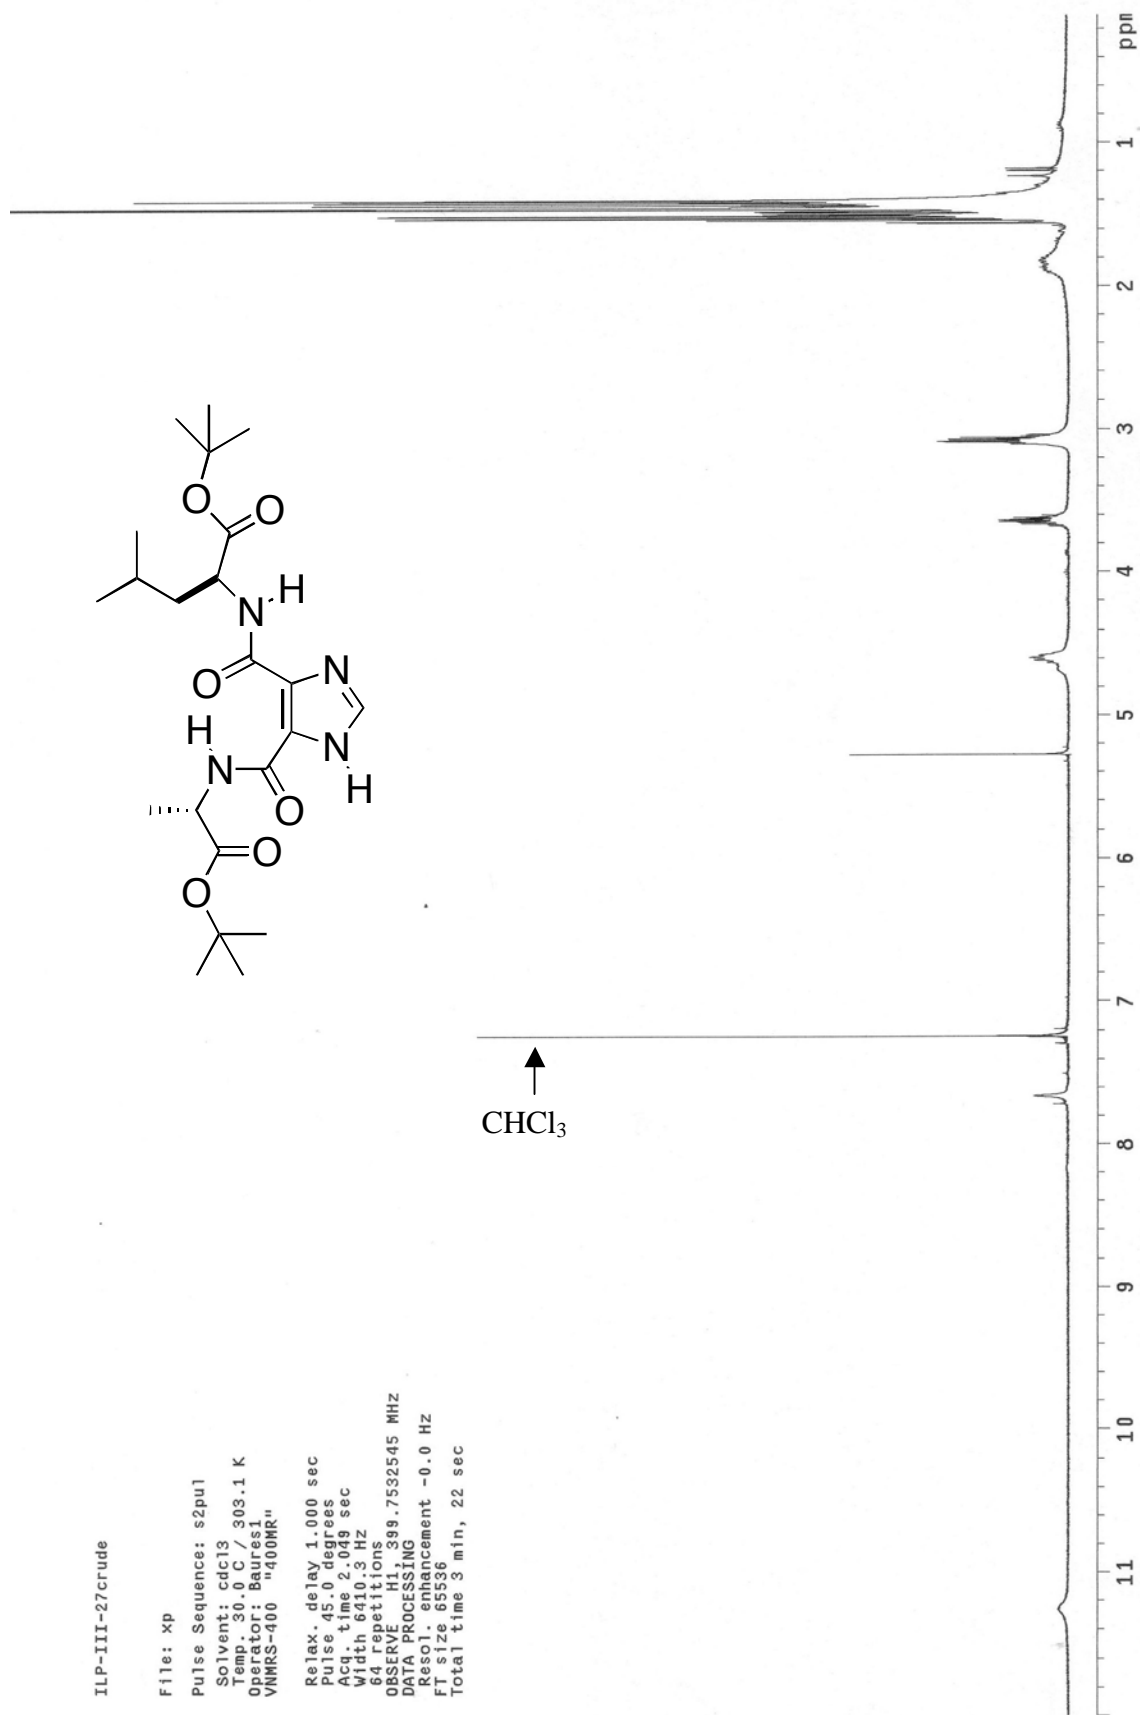

Figure S77. <sup>1</sup>H-NMR for the crude reaction to yield 4{30}.

ILP-III-1crude

File: xp

Pulse Sequence: s2pul

Solvent: cdcl3

Temp. 30.0 C / 303.1 K

Operator: Baures1

VNMR5-400 "400MR"

Relax. delay 1.000 sec

Pulse 45.0 degrees

Acq. time 2.049 sec

Width 6410.3 Hz

64 repetitions

OBSERVE H1, 399.7532548 MHz

DATA PROCESSING

Resol. enhancement -0.0 Hz

FT size 65536

Total time 3 min, 22 sec

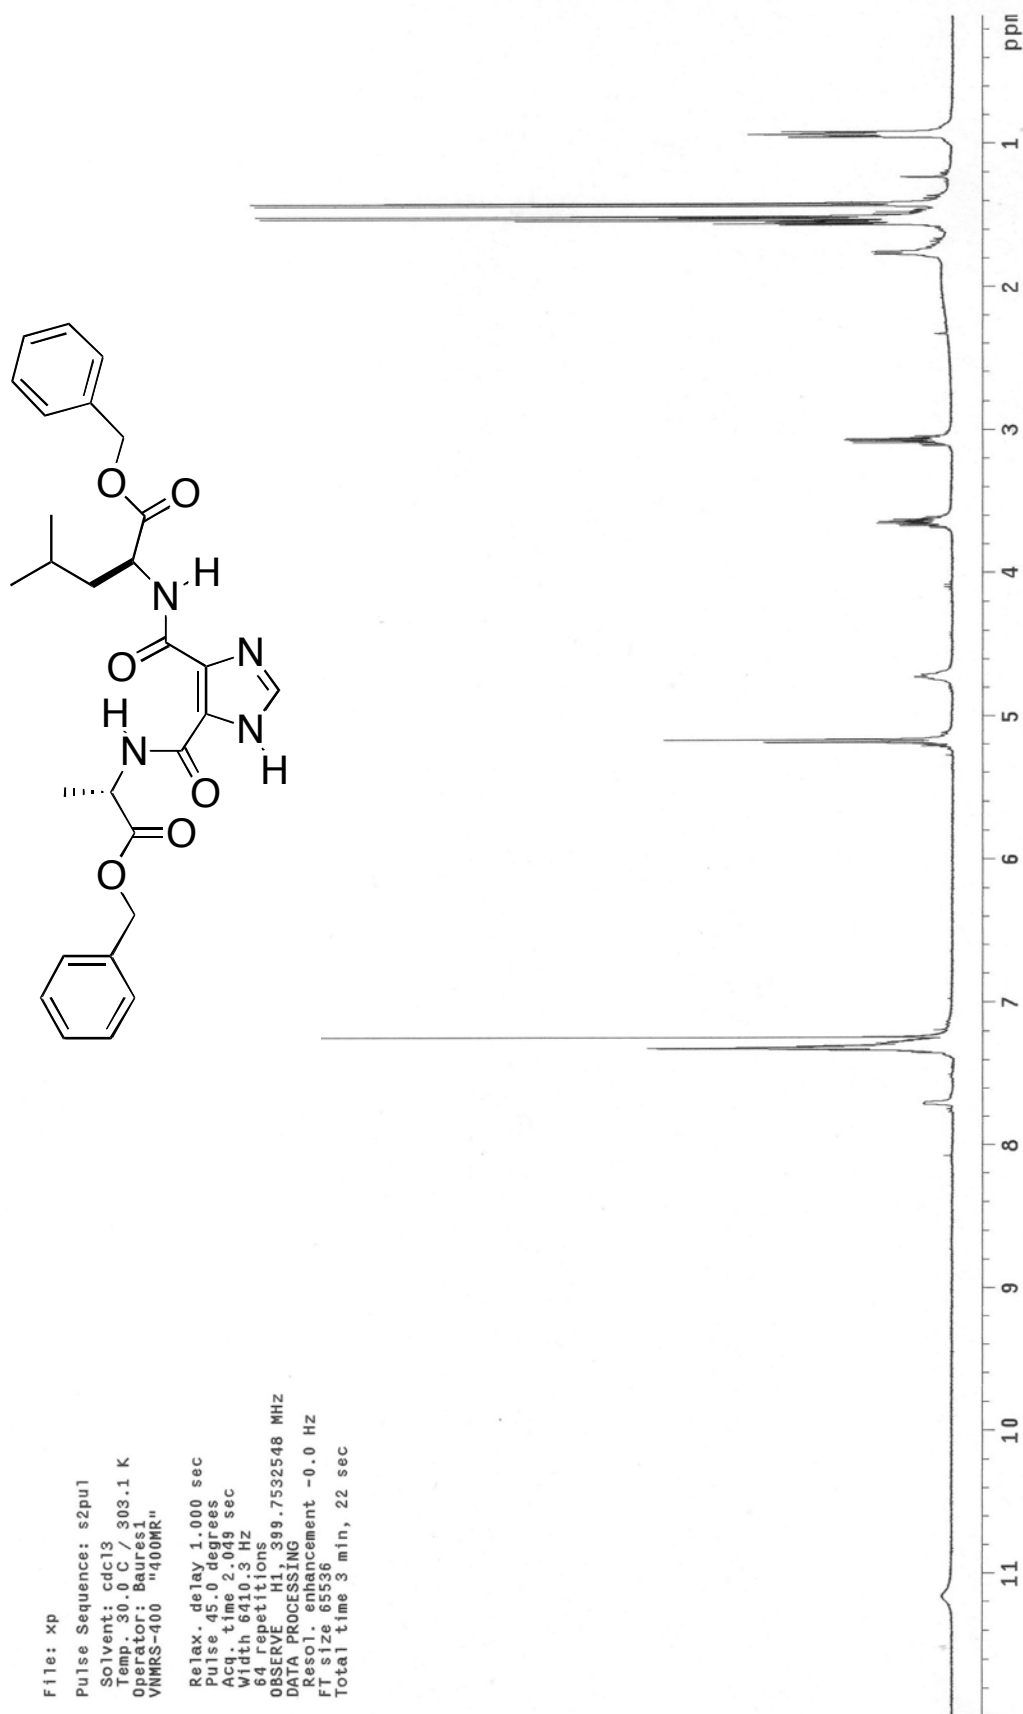

Figure S78. <sup>1</sup>H-NMR for the crude reaction to yield 4{32}.



ILP-III-29crude

File: xp

Pulse Sequence: s2pu1

Solvent: cdcl3

Temp. 30.0 C / 303.1 K

Operator: Baires1

VNMR5-400 "400MR"

Relax. delay 1.000 sec

Pulse 45.0 degrees

Acq. time 2.049 sec

Width 6410.3 Hz

64 repetitions

OBSERVE H1, 399.7532553 MHz

DATA PROCESSING

Resol. enhancement -0.0 Hz

FT size 65536

Total time 3 min, 22 sec

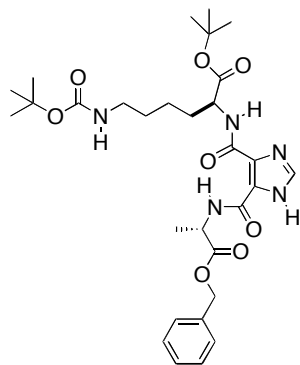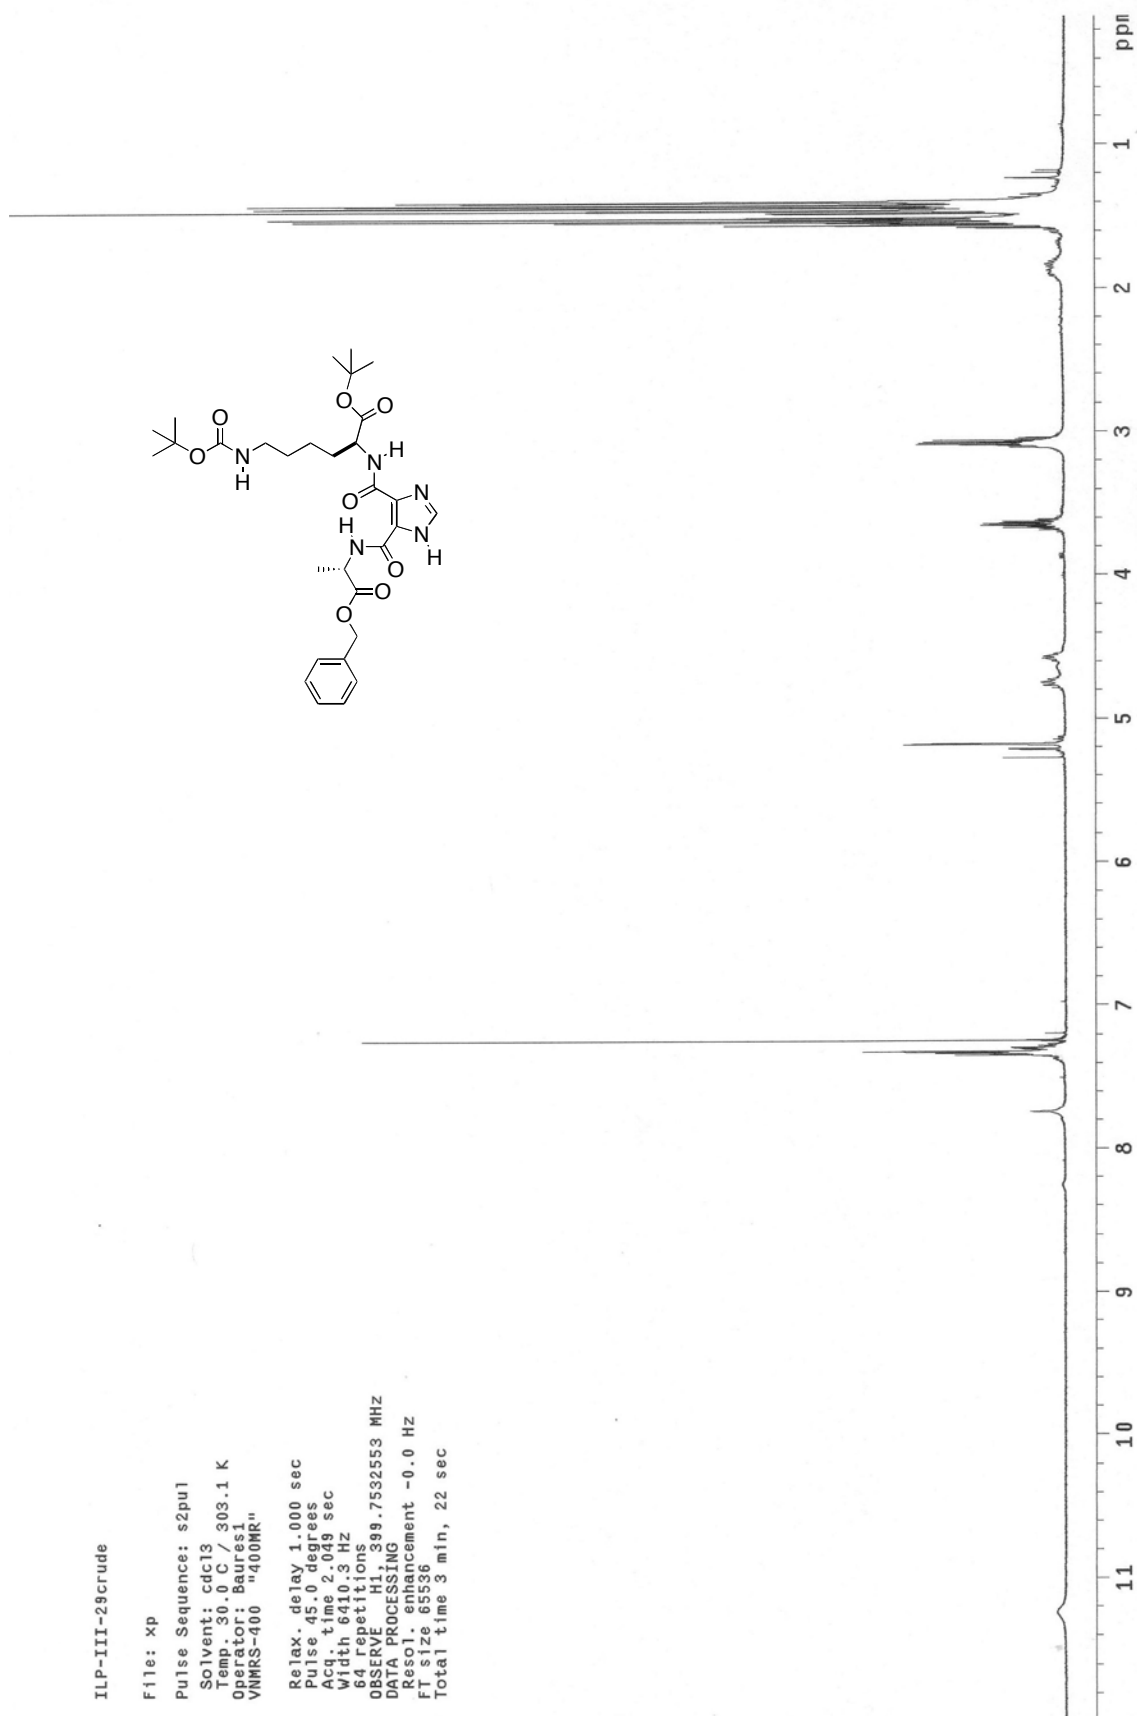

Figure S79. <sup>1</sup>H-NMR for the crude reaction to yield 4{35}.
